# Supplementary material for: Visible-light mediated cascade cyclization of ene-vinylidenecyclopropanes: access to fluorinated heterocyclic compounds
Source: Royal Society of Chemistry journal article supplement (doi:10.1039/d1qo00540e), 2021-01-01

## Supporting Information

# Visible-light mediated cascade cyclization of ene-vinylidenecyclopropanes: access to fluorinated heterocyclic compounds

Zhe Meng,<sup>a</sup> Xiaoyu Zhang,<sup>a</sup> Min Shi<sup>a,b\*</sup>

<sup>a</sup> Key Laboratory for Advanced Materials and Institute of Fine Chemicals, School of Chemistry & Molecular Engineering, East China University of Science and Technology, 130 Meilong Road, Shanghai 200237, China. [mshi@mail.sioc.ac.cn](mailto:mshi@mail.sioc.ac.cn).

<sup>b</sup> State Key Laboratory of Organometallic Chemistry, Center for Excellence in Molecular Synthesis, University of Chinese Academy of Sciences, Shanghai Institute of Organic Chemistry, Chinese Academy of Sciences, 345 Lingling Road, Shanghai 200032, China.

# Contents

|                                                                   |    |
|-------------------------------------------------------------------|----|
| 1. General remarks .....                                          | 2  |
| 2. Optimization of reaction conditions .....                      | 3  |
| 3. General procedure for the preparation of 1 .....               | 5  |
| 4. General procedure for the preparation of 2 & 3.....            | 7  |
| 5. Luminescence quenching experiments (Stern-Volmer studies)..... | 8  |
| 6. Light on/off experiments and quantum yield .....               | 9  |
| 7. Spectroscopy of compounds 1 .....                              | 14 |
| 8. Spectroscopy of compounds 2 .....                              | 19 |
| 9. Spectroscopy of compounds 3 .....                              | 24 |
| 10. X-Ray molecular structure.....                                | 28 |
| 11. Reference .....                                               | 30 |
| 12. NMR spectroscopy .....                                        | 31 |

## 1. General remarks

$^1\text{H}$ ,  $^{13}\text{C}$  and  $^{19}\text{F}$  NMR spectra were recorded at 400 MHz or 600 MHz, respectively. HRMS spectra were recorded by EI or ESI method. Infrared spectra were recorded on a Perkin-Elmer PE-983 spectrometer with absorption in  $\text{cm}^{-1}$ . Mass spectra were recorded by EI, ESI, and HRMS was measured on an Agilent Technologies 6224 TOF LC/MS instrument and a Waters Micromass GCT Premier. Melting points were determined on a digital melting point apparatus and temperatures were uncorrected. X-ray structure was determined on a Bruker Smart-1000 X-ray Diffraction meter. The employed solvents were dried up by standard methods when necessary. Commercially obtained reagents were used without further purification. All reactions were monitored by TLC with silica gel coated plates (Huanghai GF254). Flash column chromatography was performed by using 300-400 mesh silica gel eluting with ethyl acetate and petroleum ether at increased pressure. The products **1e**, **2f**, **2g**, **2l**, and **2n** contain trace of impurity, such as plasticizer or silicone grease.

## 2. Optimization of reaction conditions

**Table S1.** Optimization of reaction conditions using **1a** as a template substrate to furnish **2a** without photocatalyst.

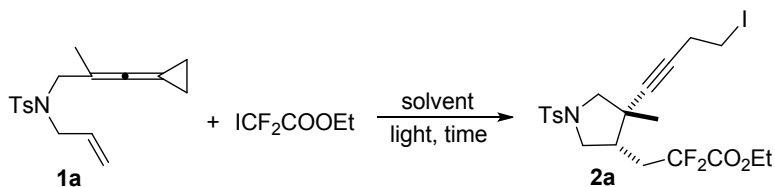

| entry <sup>[a]</sup> | solvent | light         | time | yield <sup>[b]</sup> /[%] |
|----------------------|---------|---------------|------|---------------------------|
| 1                    | DMF     | 15 W blue LED | 12 h | trace                     |
| 2                    | DMSO    | 15 W blue LED | 12 h | trace                     |
| 3                    | Dioxane | 30 W blue LED | 12 h | 80 <sup>[c]</sup>         |
| 4                    | MeCN    | 30 W blue LED | 12 h | 52 <sup>[c]</sup>         |
| 5                    | DCM     | 30 W blue LED | 12 h | 73 <sup>[c]</sup>         |
| 6                    | THF     | 30 W blue LED | 12 h | 48 <sup>[c]</sup>         |
| 7                    | MeCN    | 30 W CFL      | 12 h | trace                     |
| 8                    | MeCN    | 15 W blue LED | 24 h | 12.8 <sup>[c]</sup>       |
| 9                    | MeCN    | 15 W blue LED | 12 h | 39 <sup>[c][d]</sup>      |
| 10                   | MeCN    | 15 W blue LED | 12 h | nd <sup>[c][e]</sup>      |

<sup>[a]</sup> Reaction conditions: **1a** (0.10 mmol),  $\text{ICF}_2\text{CO}_2\text{Et}$  (0.12 mmol), and solvent 10 mL were used. <sup>[b]</sup>  $^{19}\text{F}$  NMR yield using fluorobenzene as an internal standard. <sup>[c]</sup> Containing other unidentified byproducts. <sup>[d]</sup> **1a**:  $\text{ICF}_2\text{CO}_2\text{Et}$  = 1: 2.5. <sup>[e]</sup> **1a**(0.10 mmol),  $\text{BrCF}_2\text{CO}_2\text{Et}$  (0.12 mmol).

Without adding photocatalyst, we found that the desired product **2a** can be formed in 80%  $^{19}\text{F}$  NMR yield. However, it contains several side-products with similar polarities and the desired product **2a** could not be afforded in pure form (see TLC spot shown below). At the present stage, we can not isolate these side-products to identify their structures.

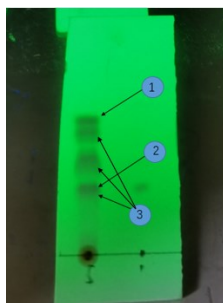

**Figure S1.** 1) Substrate **1a**; 2) Desired product **2a**; 3) Side-product

### 3. General procedure for the preparation of **1**<sup>[1], [2]</sup>

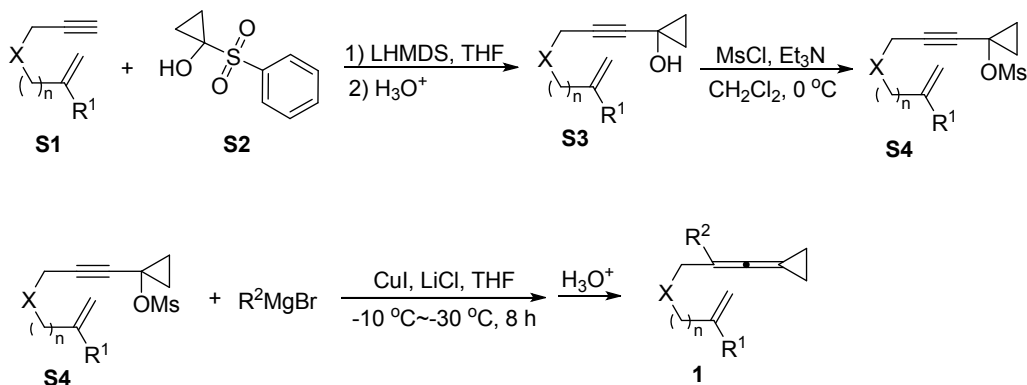

X = NTs, NBs  
n = 1, 2

#### General synthetic method for **1**:

To a solution of compounds **S1** (20 mmol) in THF (30 mL) was slowly added LHMDS (24 mmol, 1 M in THF) at  $-78\text{ }^\circ\text{C}$  under the protection of argon. The resulting solution was allowed to stir at  $-78\text{ }^\circ\text{C}$  for 30 min before a solution of **S2** (10 mmol) in THF (10 mL) was added into the above mixture. Consequently, the reaction mixture was allowed to warm up to room temperature and the mixture was left standing overnight. Then, saturated  $\text{NH}_4\text{Cl}$  solution was added to quench the reaction. Extracted with EA, dried over anhydrous  $\text{Na}_2\text{SO}_4$ , filtered, the organic phase was purified by a flash column chromatography on silica gel to give the desired products **S3** (PE/EA: 4/1~2/1).

To a solution of **S3** (5.0 mmol) and anhydrous  $\text{Et}_3\text{N}$  (2.0 equiv) in  $\text{CH}_2\text{Cl}_2$  (20 mL) was added  $\text{MsCl}$  (2.0 equiv) at  $0\text{ }^\circ\text{C}$  under the protection of argon. The resulting solution was allowed to stir at  $0\text{ }^\circ\text{C}$  for 1 h before some amounts of water were added to quench the reaction. Extracted with  $\text{CH}_2\text{Cl}_2$  (20 mL $\times$ 3), dried over anhydrous  $\text{Na}_2\text{SO}_4$ , filtered, the organic phase was purified by a flash column chromatography on silica gel to give the desired products **S4** (PE/EA: 2/1).

To a flame dried 50 mL three-neck flask was added anhydrous  $\text{CuI}$  (8.8 mmol),  $\text{LiCl}$  (8.8 mmol) and the solvent THF (20 mL) under the protection of argon. Then, the flask was cooled to  $-10\text{ }^\circ\text{C}$  before the solution of  $\text{RMgBr}$  or  $\text{RMgCl}$  (2.0 M, 4 mL) was added dropwise into the flask under argon. 5 minutes later, the flask was moved into a  $-30\sim-40\text{ }^\circ\text{C}$  bath and stirred for a while before a solution of **S4** (4 mmol) in THF (10 mL) was added dropwise into the above flask. The resulting solution was allowed

to stir at -40 °C for 8 h before saturated  $\text{NH}_4\text{Cl}$  solution was added to quench the reaction. Extracted with EA (20 mL  $\times$  3), dried over anhydrous  $\text{Na}_2\text{SO}_4$ , filtered, the organic phase was purified by a flash column chromatography on silica gel to give the desired products (PE/EA: 10/1).

#### 4. General procedure for the preparation of 2 & 3.

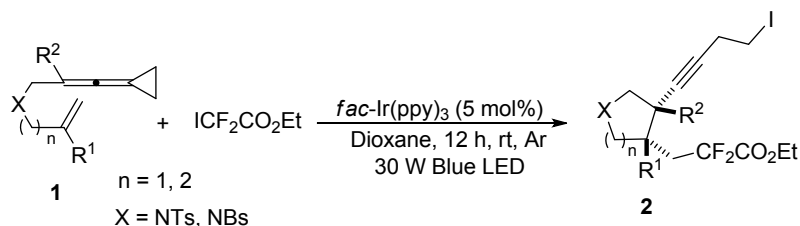

VDCPs **1** (0.2 mmol, 1 equiv) and Ir(ppy)<sub>3</sub> (5 mol %, 0.01 mmol) were added in an flame dried 25 mL Schlenk tube. The reaction tube was placed under vacuum and backfilled with argon three times. Then, ICF<sub>2</sub>CO<sub>2</sub>Et (0.24 mmol) and dioxane (10 mL) were added in the Schlenk tube via a syringe. Next, the tube was placed 5 cm away from blue LEDs (30 W), and stirred vigorously under the irradiation of blue light for 12 h. After completion, the solvent was removed under reduced pressure. The crude product residue was purified by a column chromatography on silica gel (PE/EA: 10/1 to 4/1) to afford the purified product.

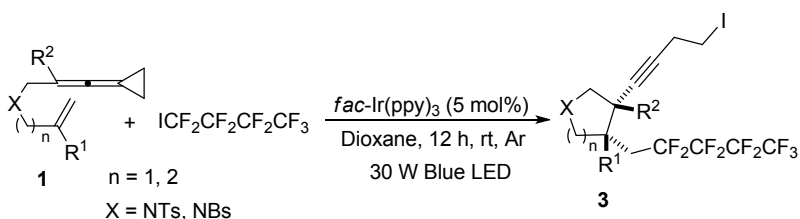

VDCPs **1** (0.2 mmol, 1 equiv) and Ir(ppy)<sub>3</sub> (5 mol %, 0.01 mmol) were added in an flame dried 25 mL Schlenk tube. The reaction tube was placed under vacuum and backfilled with argon three times. Then ICF<sub>2</sub>CF<sub>2</sub>CF<sub>2</sub>CF<sub>3</sub> (0.24 mmol) and dioxane (10 mL) were added in the Schlenk tube via a syringe. Next, the tube was placed 5 cm away from blue LEDs (30 W), and stirred vigorously under the irradiation of blue light for 12 h. After completion, the solvent was removed under reduced pressure. The crude product residue was purified by a column chromatography on silica gel (PE/EA: 10/1 to 4/1) to afford the purified product.

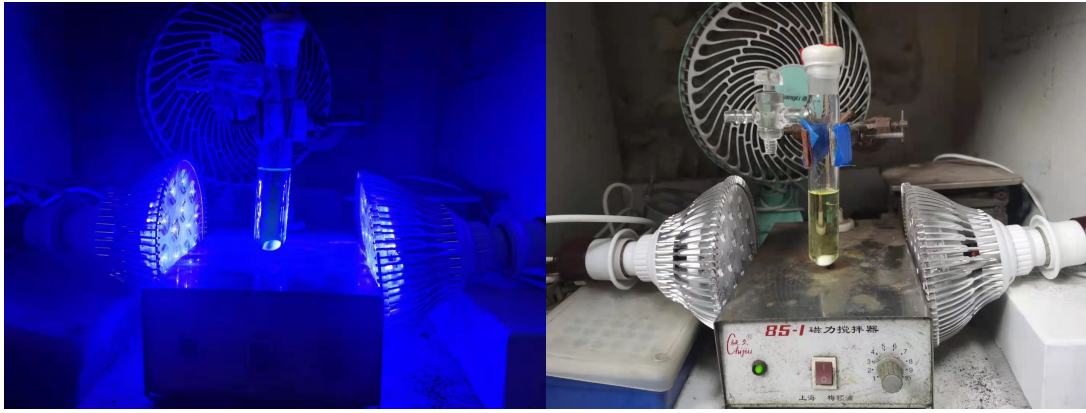



#### 4. Luminescence quenching experiments (Stern-Volmer Studies)<sup>[3]</sup>

Emission intensities were recorded using Varian Cary Eclipse spectrometer for all experiments. All Ir[ppy]<sub>3</sub> solutions were excited at 380 nm and the emission intensity was collected at 510 nm. Solutions of different concentration of ICF<sub>2</sub>CO<sub>2</sub>Et were prepared and introduced to a 1 cm path length quartz cuvette equipped with a Teflon® septum. In a typical experiment, to a 0.005 M solution of **1h** in dioxane was added the appropriate amount photocatalyst in screw-top quartz cuvette and the emission of the sample was collected.

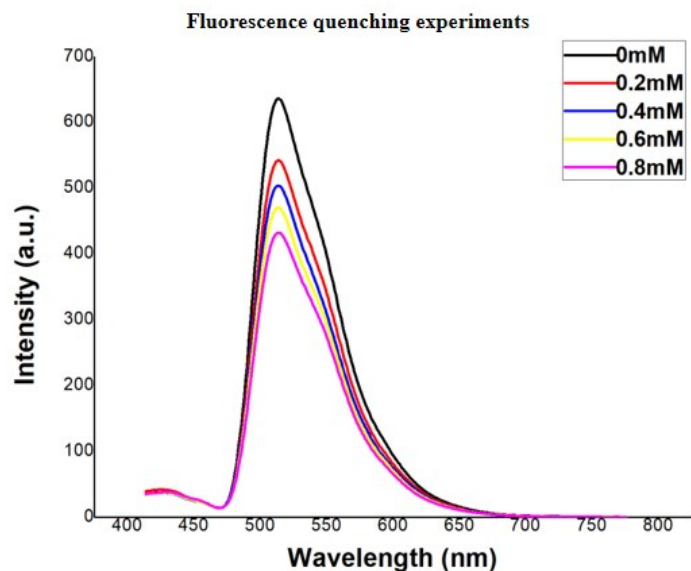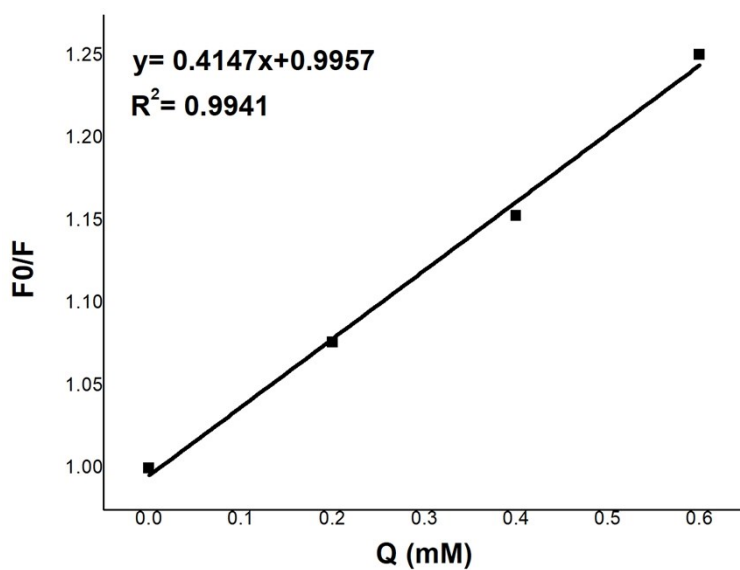

## 6. Light on/off experiments and quantum yield<sup>[4]</sup>

To study the necessity of continuous irradiation with visible light for the progress of the reaction, the reaction proceeding was monitored by <sup>1</sup>H NMR spectroscopy using 1,3,5-trimethoxybenzene as an internal standard before and after light irradiation and dark periods.

The control experiments shown below with successive intervals of irradiation and dark periods did not result in interruption of the reaction progress in the absence of light, demonstrating that light is not a necessary component for the reaction after triggering the reaction in the first part.

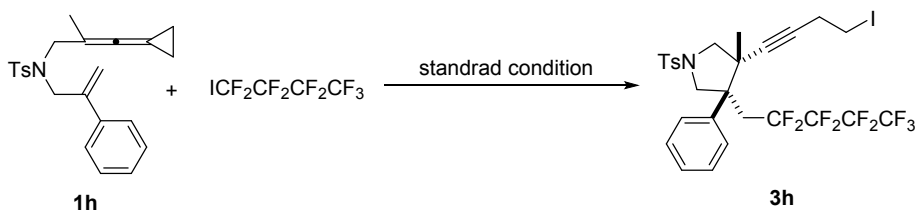

### Light on/off experiments

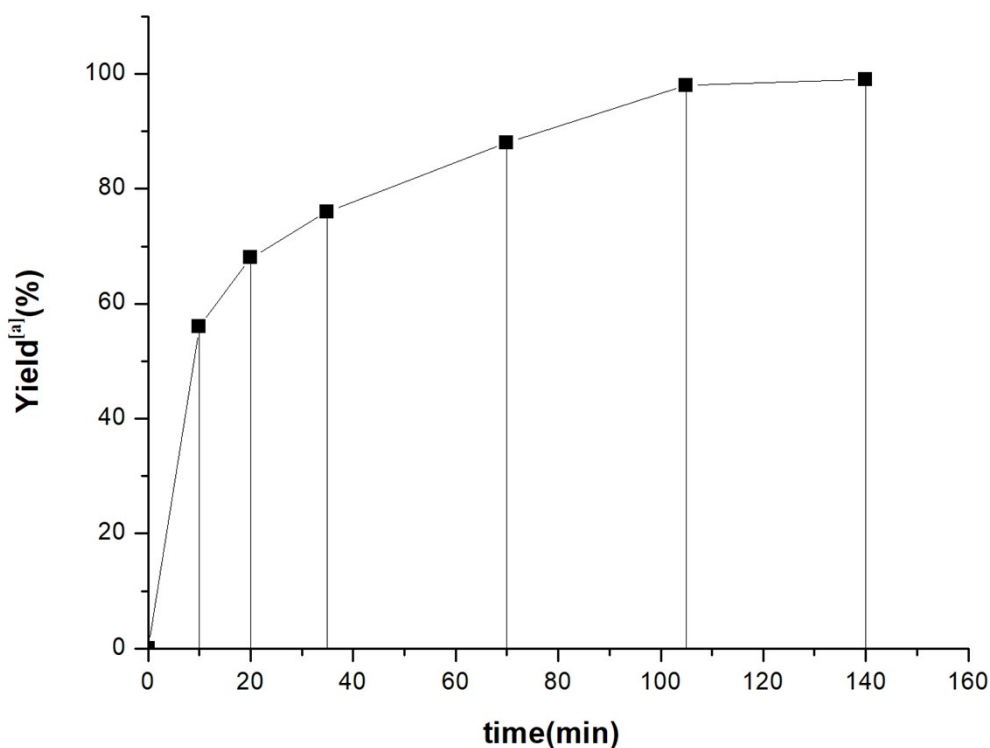

[a] Determined by <sup>1</sup>H NMR analysis with 1,3,5-trimethoxybenzene as an internal standard

To further investigate whether the chain process is involved upon light irradiation, we measured the quantum yield of the template reaction of 1 h to 3 h.

$$\Phi = \frac{n_x}{n_p} = \frac{n_x}{\frac{\Delta E \times S \times t}{N_A h \nu}}$$

$n_x$  is the amount of photochemical or photophysical events  $x$  occurred during irradiation,  $n_p$  is the number of photons absorbed by the reactant.  $E$  is the radiant power.  $S$  is the irradiated area.  $t$  is the irradiated time.  $N_A$  is the A. F. Gageiro constant.  $h$  is the Planck constant.  $\nu$  is the frequency of incident light.  $n_x$  was analyzed by  $^1\text{H}$  NMR,  $\Delta E$  was measured by ILT1400 Portable Radiometer/Photometer.

Compound **1h** (0.10 mmol, 1.0 equiv),  $\text{ICF}_2\text{CF}_2\text{CF}_2\text{CF}_3$  (0.12 mmol, 1.2 equiv) were added to 2 mL dioxane with blue LED irradiation for 10 min. The reaction mixture was concentrated in vacuo and analyzed by  $^1\text{H}$  NMR spectrum using 1,3,5-trimethoxybenzene as an internal standard. The quantum yield is calculated to be 23.

## 7. Spectroscopy of compounds 1

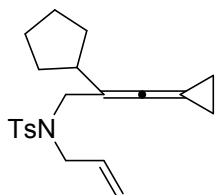

**Compound 1a:** colorless oil (357 mg, 50%).  $^1\text{H}$  NMR (400 MHz,  $\text{CDCl}_3$ , TMS)  $\delta$  7.70 (d,  $J = 8.0$  Hz, 2H), 7.27 (d,  $J = 8.4$  Hz, 2H), 5.54 (td,  $J = 16.8, 6.6$  Hz, 1H), 5.14 - 5.06 (m, 2H), 3.86 - 3.82 (m, 4H), 2.42 (s, 3H), 2.39 - 2.33 (m, 1H), 1.85 - 1.77 (m, 2H), 1.65 - 1.59 (m, 2H), 1.53 - 1.50 (m, 2H), 1.46 - 1.43 (m, 2H), 1.39 - 1.33 (m, 4H).  $^{13}\text{C}$  NMR (100 MHz,  $\text{CDCl}_3$ )  $\delta$  187.1, 142.9, 137.6, 132.3, 129.5, 127.2, 125.2, 119.1, 106.6, 105.0, 79.6, 49.5, 49.1, 39.9, 31.8, 29.7, 24.9, 21.5, 6.9. IR (neat)  $\nu$  2868, 2342, 2017, 1597, 1492, 1341, 1301, 1259, 1161, 1105, 1088, 1049, 1025, 923, 907, 870, 816, 802, 769, 708  $\text{cm}^{-1}$ . HRMS (ESI) Calcd. for  $\text{C}_{21}\text{H}_{27}\text{NO}_2\text{SNa}$  requires  $[\text{M}+\text{Na}]^+$ : 380.1651, Found: 380.1655. 2990, 2952,

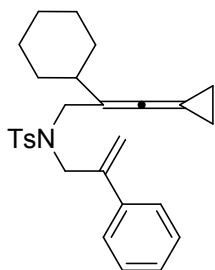

**Compound 1b:** colorless oil (385 mg, 43%).  $^1\text{H}$  NMR (400 MHz,  $\text{CDCl}_3$ , TMS)  $\delta$  7.63 (d,  $J = 8.0$  Hz, 2H), 7.34 (d,  $J = 7.6$  Hz, 2H), 7.27 - 7.26 (m, 3H), 7.23 (d,  $J = 8.0$  Hz, 2H), 5.39 (s, 1H), 5.24 (s, 1H), 4.25 (s, 2H), 3.84 (s, 2H), 2.41 (s, 3H), 1.67 - 1.58 (m, 5H), 1.39 - 1.36 (m, 2H), 1.28 - 1.24 (m, 2H), 1.15 - 0.88 (m, 6H).  $^{13}\text{C}$  NMR (150 MHz,  $\text{CDCl}_3$ )  $\delta$  187.8, 142.8, 142.7, 139.2, 137.4, 129.4, 128.2, 127.7, 127.3, 126.5, 115.8, 108.0, 79.7, 50.6, 48.8, 38.2, 32.1, 26.3, 26.2, 21.4, 6.9. IR (neat)  $\nu$  2988, 2912, 2341, 2014, 1496, 1448, 1394, 1259, 1168, 1160, 1096, 1066, 1046, 946, 905, 878, 858, 811, 781, 709, 688, 668, 660  $\text{cm}^{-1}$ . HRMS (ESI) Calcd. for  $\text{C}_{28}\text{H}_{33}\text{NO}_2\text{SNa}$  requires  $[\text{M}+\text{Na}]^+$ : 470.2127, Found: 470.2124.

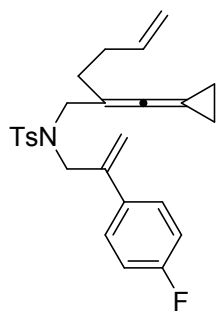

**Compound 1c:** colorless oil (180 mg, 40%).  $^1\text{H}$  NMR (400 MHz,  $\text{CDCl}_3$ , TMS)  $\delta$  7.62 (d,  $J = 8.1$  Hz, 2H), 7.33 - 7.29 (m, 2H), 7.24 (d,  $J = 8.0$  Hz, 3H), 6.94 (t,  $J = 8.6$  Hz, 2H), 5.76 - 5.63 (m, 1H), 5.32 (s, 1H), 5.19 (s, 1H), 4.93 - 4.89 (m, 2H), 4.21 (s, 2H), 3.78 (s, 2H), 2.42 (s, 3H), 2.03 - 1.98 (m, 2H), 1.87 - 1.84 (m, 2H), 1.42 - 1.37 (m, 2H), 1.36 - 1.31 (m, 2H).  $^{13}\text{C}$  NMR (100 MHz,  $\text{CDCl}_3$ )  $\delta$  188.4, 162.5 (d,  $J = 245.2$  Hz) 143.0, 141.9, 138.2, 137.0, 134.9 (d,  $J = 3.2$  Hz), 129.5, 128.3 (d,  $J = 8.0$  Hz), 127.2, 116.2, 115.0 (d,  $J = 21.2$  Hz), 114.5, 102.1, 79.3, 51.3, 50.9, 31.6, 29.5, 21.5, 6.8.  $^{19}\text{F}$  NMR (376 MHz,  $\text{CDCl}_3$ )  $\delta$  -114.6 (s). IR (neat)  $\nu$  3073, 2985, 2919, 2259, 2022, 1639, 1601, 1509, 1333, 1304, 1232, 1156, 1091, 1016, 906, 840, 814  $\text{cm}^{-1}$ . HRMS (ESI) Calcd. for  $\text{C}_{26}\text{H}_{28}\text{NO}_2\text{FSNa}$  requires  $[\text{M}+\text{Na}]^+$ : 460.1734, Found: 460.1717.

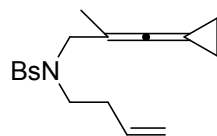

**Compound 1d:** colorless oil (120 mg, 30%).  $^1\text{H}$  NMR (400 MHz,  $\text{CDCl}_3$ , TMS)  $\delta$  7.67 - 7.62 (m, 4H), 5.72 - 5.61 (m, 1H), 5.04 - 4.99 (m, 2H), 3.83 (s, 2H), 3.24 - 3.20 (m, 2H), 2.27 (q,  $J = 7.4$  Hz, 2H), 1.72 (s, 3H), 1.48 - 1.43 (m, 2H), 1.41 - 1.36 (m, 2H).  $^{13}\text{C}$  NMR (100 MHz,  $\text{CDCl}_3$ )  $\delta$  188.8, 139.5, 134.7, 132.2, 128.6, 127.2, 117.0, 97.2, 77.9, 52.4, 46.9, 32.6, 17.0, 7.1. IR (neat)  $\nu$  2981, 2905, 2019, 1638, 1575, 1389, 1339, 1278, 1156, 1129, 1085, 1061, 1007, 906, 820, 777, 755, 730  $\text{cm}^{-1}$ . HRMS (ESI) Calcd. for  $\text{C}_{17}\text{H}_{20}\text{NO}_2\text{SNaBr}$  requires  $[\text{M}+\text{Na}]^+$ : 404.0287, Found: 404.0290.

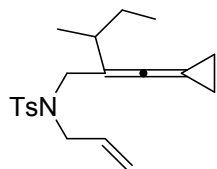

**Compound 1e:** colorless oil (250 mg, 55%).  $^1\text{H}$  NMR (400 MHz,  $\text{CDCl}_3$ , TMS)  $\delta$  7.70 (d,  $J = 8.2$  Hz, 2H), 7.27 (d,  $J = 8.0$  Hz, 2H), 5.58 - 5.48 (m, 1H), 5.13 - 5.06 (m, 2H), 3.86 - 3.81 (m, 4H), 2.42 (s, 3H), 2.03 - 1.98 (m, 1H), 1.50 - 1.40 (m, 3H), 1.37 - 1.24 (m, 3H), 1.00 (d,  $J = 6.8$  Hz, 3H), 0.86 (t,  $J =$

7.4 Hz, 3H).  $^{13}\text{C}$  NMR (100 MHz,  $\text{CDCl}_3$ )  $\delta$  187.9, 142.9, 137.7, 132.4, 129.5, 127.2, 119.1, 107.1, 79.6, 49.0, 48.6, 35.1, 28.2, 21.5, 19.0, 11.5, 6.9, 6.8. IR (neat)  $\nu$  3084, 2921, 2024, 1472, 1345, 1160, 1088, 1009, 754  $\text{cm}^{-1}$ . HRMS (ESI) Calcd. for  $\text{C}_{20}\text{H}_{27}\text{NO}_2\text{NaS}$  requires  $[\text{M}+\text{Na}]^+$ : 368.1660, Found: 368.1655.

## 8. Spectroscopy of compounds 2

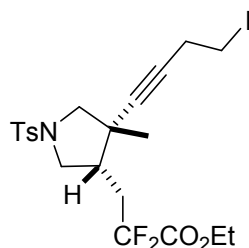

**Compound 2a:** colorless oil (91.8 mg, 83%). <sup>1</sup>H NMR (600 MHz, CDCl<sub>3</sub>, TMS) δ 7.74 (d, *J* = 8.3 Hz, 2H), 7.33 (d, *J* = 7.9 Hz, 2H), 4.33 (q, *J* = 7.1 Hz, 2H), 3.76 (t, *J* = 8.4 Hz, 1H), 3.60 (d, *J* = 10.0 Hz, 1H), 3.15 (d, *J* = 10.1 Hz, 1H), 3.10 (t, *J* = 10.1 Hz, 1H), 3.01 - 2.94 (m, 2H), 2.49 - 2.41 (m, 5H), 2.31 - 2.12 (m, 2H), 2.01 - 1.95 (m, 1H), 1.35 (t, *J* = 7.2 Hz, 3H), 1.21 (s, 3H). <sup>13</sup>C NMR (150 MHz, CDCl<sub>3</sub>) δ 163.8 (t, *J*<sub>CF</sub> = 32.1 Hz), 143.3, 134.3, 129.6, 127.7, 115.6 (t, *J*<sub>CF</sub> = 249.6 Hz), 83.2, 82.1, 63.2, 59.9, 52.1, 42.2, 41.5, 33.6 (t, *J*<sub>CF</sub> = 23.4 Hz), 23.5, 22.9, 21.6, 14.0, 1.8. <sup>19</sup>F NMR (564 MHz, CDCl<sub>3</sub>) δ -103.5 (ddd, *J*<sub>1</sub> = 263.3 Hz, *J*<sub>2</sub> = 24.3 Hz, *J*<sub>3</sub> = 10.2 Hz), -106.0 (ddd, *J*<sub>1</sub> = 263.3 Hz, *J*<sub>2</sub> = 24.3 Hz, *J*<sub>3</sub> = 10.2 Hz). IR (neat) ν 2977, 2861, 1763, 1597, 1493, 1478, 1434, 1400, 1337, 1302, 1238, 1197, 1191, 1060, 1008, 842, 738, 706 cm<sup>-1</sup>. HRMS (ESI) Calcd. for C<sub>21</sub>H<sub>27</sub>NO<sub>4</sub>SIF<sub>2</sub> requires [M+H]<sup>+</sup>: 554.0668, Found: 554.0668.

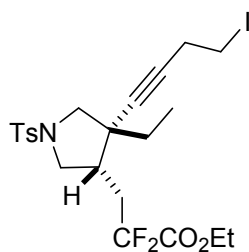

**Compound 2b:** colorless oil (88.5 mg, 78%). <sup>1</sup>H NMR (400 MHz, CDCl<sub>3</sub>, TMS) δ 7.74 (d, *J* = 8.0 Hz, 2H), 7.34 (d, *J* = 7.9 Hz, 2H), 4.32 (q, *J* = 7.1 Hz, 2H), 3.76 (t, *J* = 8.4 Hz, 1H), 3.56 (d, *J* = 10.0 Hz, 1H), 3.16 (d, *J* = 10.0 Hz, 1H), 3.10 (t, *J* = 10.0 Hz, 1H), 3.01 - 2.96 (m, 2H), 2.50 - 2.45 (m, 5H), 2.32 - 2.12 (m, 2H), 2.06 - 1.98 (m, 1H), 1.68 - 1.60 (m, 1H), 1.35 (t, *J* = 7.1 Hz, 3H), 1.29 - 1.24 (m, 1H), 0.97 (t, *J* = 7.4 Hz, 3H). <sup>13</sup>C NMR (150 MHz, CDCl<sub>3</sub>) δ 163.8 (t, *J*<sub>CF</sub> = 32.7 Hz), 143.3, 134.2, 129.6, 127.7, 115.7 (t, *J*<sub>CF</sub> = 249.8 Hz), 84.2, 81.1, 63.1, 58.4, 52.2, 46.6, 41.3, 33.9 (t, *J*<sub>CF</sub> = 23.3 Hz), 30.1, 23.6, 21.6, 14.0, 10.1, 2.0. <sup>19</sup>F NMR (564 MHz, CDCl<sub>3</sub>) δ -103.3 (ddd, *J*<sub>1</sub> = 261.8 Hz, *J*<sub>2</sub> = 25.0 Hz, *J*<sub>3</sub> = 10.1 Hz), -106.1 (ddd, *J*<sub>1</sub> = 262.0 Hz, *J*<sub>2</sub> = 22.9 Hz, *J*<sub>3</sub> = 15.2 Hz). IR (neat) ν 2973, 2919, 2849, 1763, 1645, 1597, 1458, 1337, 1250, 1235, 1193, 1160, 1091, 1059, 1012, 817, 773, 707 cm<sup>-1</sup>. HRMS (ESI) Calcd. for C<sub>22</sub>H<sub>29</sub>NO<sub>4</sub>SIF<sub>2</sub> requires [M+H]<sup>+</sup>: 568.0825, Found: 568.0823.

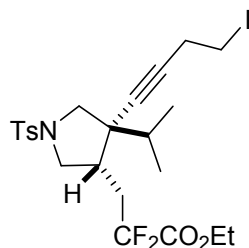

**Compound 2c:** colorless oil (84.9 mg, 73%). <sup>1</sup>H NMR (400 MHz, CDCl<sub>3</sub>, TMS) δ 7.74 (d, *J* = 8.1 Hz, 2H), 7.34 (d, *J* = 8.0 Hz, 2H), 4.32 (q, *J* = 7.1 Hz, 2H), 3.75 (t, *J* = 8.1 Hz, 1H), 3.35 (d, *J* = 10.1 Hz, 1H), 3.28 (d, *J* = 10.1 Hz, 1H), 3.05 (t, *J* = 9.9 Hz, 1H), 3.01 - 2.98 (m, 2H), 2.51 - 2.48 (m, 3H), 2.45 (s, 3H), 2.35 - 2.10 (m, 3H), 1.78 - 1.71 (m, 1H), 1.35 (t, *J* = 7.2 Hz, 3H), 1.01 (d, *J* = 6.8 Hz, 3H), 0.86 (d, *J* = 6.8 Hz, 3H). <sup>13</sup>C NMR (150 MHz, CDCl<sub>3</sub>) δ 163.8 (t, *J*<sub>CF</sub> = 32.0 Hz), 143.4, 133.8, 129.6, 127.7, 115.7 (t, *J*<sub>CF</sub> = 248.7 Hz), 84.2, 81.6, 63.1, 55.3, 52.6, 49.8, 38.0, 34.2 (t, *J*<sub>CF</sub> = 23.4 Hz), 33.2, 23.6, 21.6, 19.3, 17.1, 13.9, 2.1. <sup>19</sup>F NMR (564 MHz, CDCl<sub>3</sub>) δ -103.0 (ddd, *J*<sub>1</sub> = 261.9 Hz, *J*<sub>2</sub> = 24.2 Hz, *J*<sub>3</sub> = 9.8 Hz), -106.1 (ddd, *J*<sub>1</sub> = 261.6 Hz, *J*<sub>2</sub> = 22.7 Hz, *J*<sub>3</sub> = 15.6 Hz). IR (neat) ν 2966, 2920, 2848, 2360, 2339, 1464, 1646, 1598, 1469, 373, 1345, 1306, 1248, 1158, 1095, 1057, 1016, 849, 813, 741 cm<sup>-1</sup>. HRMS (ESI) Calcd. for C<sub>23</sub>H<sub>31</sub>NO<sub>4</sub>SIF<sub>2</sub> requires [M+H]<sup>+</sup>: 582.0981, Found: 582.0982.

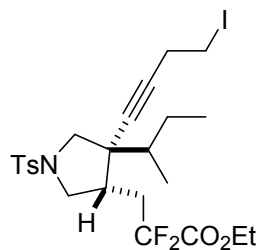

**Compound 2d:** colorless oil (83.4 mg, 70%). <sup>1</sup>H NMR (400 MHz, CDCl<sub>3</sub>, TMS) δ 7.73 (d, *J* = 7.9 Hz, 2H), 7.34 (d, *J* = 7.9 Hz, 2H), 4.32 (q, *J* = 7.1 Hz, 2H), 3.77 - 3.72 (m, 2H), 3.39 - 3.36 (m, 2H), 3.08 - 2.95 (m, 3H), 2.52 - 2.45 (m, 5H), 2.37 - 2.08 (m, 3H), 1.35 (t, *J* = 7.2 Hz, 5H), 0.99 (d, *J* = 6.7 Hz, 3H), 0.94 - 0.84 (m, 3H), 0.79 (d, *J* = 6.8 Hz, 1H). <sup>13</sup>C NMR (150 MHz, CDCl<sub>3</sub>) δ 163.8 (t, *J*<sub>CF</sub> = 32.0 Hz), 143.4, 143.3, 133.9, 133.7, 129.6, 129.5, 127.70, 127.67, 115.7 (t, *J*<sub>CF</sub> = 249.8 Hz), 84.2, 83.9, 82.3, 81.9, 63.1, 55.9, 54.3, 52.6, 52.1, 50.1, 49.9, 40.2, 39.2, 37.6, 37.5, 34.4 (t, *J*<sub>CF</sub> = 23.1 Hz), 33.7 (t, *J*<sub>CF</sub> = 22.7 Hz), 25.9, 23.8, 23.6, 23.5, 21.6, 15.3, 13.9, 12.6, 12.25, 12.22, 2.1, 2.0. <sup>19</sup>F NMR (376 MHz, CDCl<sub>3</sub>) δ -102.5 - -103.4 (m), -105.6 - -106.5 (m). IR (neat) ν 663, 730, 774, 814, 841, 907, 1017, 1040, 1091, 1156, 1232, 1305, 1333, 1445, 1510, 1601, 1640, 2023, 2260, 2850, 2920, 2985, 3074 cm<sup>-1</sup>. HRMS (ESI) Calcd. for C<sub>24</sub>H<sub>33</sub>NO<sub>4</sub>F<sub>2</sub>SI requires [M+H]<sup>+</sup>: 596.1142, Found: 596.1138.



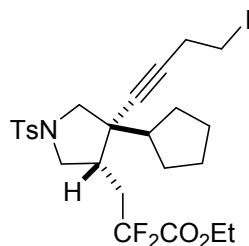

**Compound 2e:** colorless oil (81.4 mg, 67%).  $^1\text{H}$  NMR (400 MHz,  $\text{CDCl}_3$ , TMS)  $\delta$  7.74 (d,  $J = 8.2$  Hz, 2H), 7.34 (d,  $J = 8.0$  Hz, 2H), 4.32 (q,  $J = 7.1$  Hz, 2H), 3.74 (t,  $J = 7.1$  Hz, 1H), 3.45 (d,  $J = 10.1$  Hz, 1H), 3.26 (d,  $J = 10.1$  Hz, 1H), 3.06 (t,  $J = 9.6$  Hz, 2H), 3.02 - 2.98 (m, 2H), 2.50 (t,  $J = 7.5$  Hz, 2H), 2.45 (s, 3H), 2.42 - 2.32 (m, 1H), 2.18 - 2.08 (m, 2H), 1.84 - 1.74 (m, 2H), 1.65 - 1.48 (m, 6H), 1.35 (t,  $J = 7.1$  Hz, 5H).  $^{13}\text{C}$  NMR (150 MHz,  $\text{CDCl}_3$ )  $\delta$  163.9 (t,  $J_{\text{CF}} = 31.8$  Hz), 143.3, 133.9, 129.6, 127.7, 115.7 (t,  $J_{\text{CF}} = 249.9$  Hz), 84.3, 80.9, 63.1, 57.4, 52.6, 48.9, 46.6, 40.7, 34.5 (t,  $J_{\text{CF}} = 23.0$  Hz), 29.2, 28.3, 25.5, 24.8, 21.6, 14.0, 2.2.  $^{19}\text{F}$  NMR (565 MHz,  $\text{CDCl}_3$ ) -102.9 (ddd,  $J_1 = 261.0$  Hz,  $J_2 = 24.8$  Hz,  $J_3 = 8.2$  Hz), -105.9 - -106.5 (m). IR (neat)  $\nu$  813, 1056, 1093, 1163, 1305, 1375, 1395, 1457, 1521, 1540, 1597, 1653, 1717, 1768, 1966, 2160, 2342, 2834, 2865, 2918  $\text{cm}^{-1}$ . HRMS (ESI) Calcd. for  $\text{C}_{25}\text{H}_{33}\text{F}_2\text{INO}_4\text{S}$  requires  $[\text{M}+\text{H}]^+$ : 608.1147, Found: 608.1138.

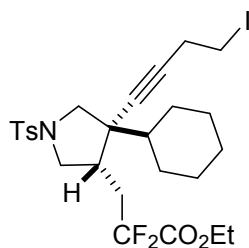

**Compound 2f:** colorless oil (74.6 mg, 60%).  $^1\text{H}$  NMR (600 MHz,  $\text{CDCl}_3$ , TMS)  $\delta$  7.73 (d,  $J = 8.2$  Hz, 2H), 7.34 (d,  $J = 7.8$  Hz, 2H), 4.32 (q,  $J = 7.1$  Hz, 2H), 3.74 (dd,  $J = 9.5, 7.1$  Hz, 1H), 3.34 (d,  $J = 10.0$  Hz, 1H), 3.30 (d,  $J = 10.1$  Hz, 1H), 3.05 (t,  $J = 9.8$  Hz, 1H), 3.02 - 2.96 (m, 2H), 2.50 - 2.47 (m, 2H), 2.45 (s, 3H), 2.32 - 2.10 (m, 3H), 1.97 - 1.95 (m, 1H), 1.78 - 1.76 (m, 2H), 1.68 - 1.65 (m, 1H), 1.54 (d,  $J = 12.4$  Hz, 1H), 1.35 (t,  $J = 7.1$  Hz, 4H), 1.21 - 0.92 (m, 5H).  $^{13}\text{C}$  NMR (150 MHz,  $\text{CDCl}_3$ )  $\delta$  163.9 (t,  $J_{\text{CF}} = 31.8$  Hz), 143.3, 133.9, 129.6, 127.7, 115.7 (t,  $J_{\text{CF}} = 249.6$  Hz), 84.0, 82.0, 63.2, 55.6, 52.3, 49.5, 42.8, 37.1, 34.2 (t,  $J_{\text{CF}} = 23.3$  Hz), 29.4, 26.8, 26.5, 26.2, 26.1, 23.6, 21.6, 13.9, 2.1.  $^{19}\text{F}$  NMR (376 MHz,  $\text{CDCl}_3$ )  $\delta$  -102.9 (ddd,  $J_1 = 261.9$  Hz,  $J_2 = 23.1$  Hz,  $J_3 = 9.8$  Hz), -106.0 (ddd,  $J_1 = 261.8$  Hz,  $J_2 = 22.7$  Hz,  $J_3 = 15.4$  Hz). IR (neat)  $\nu$  2927, 2853, 1765, 1598, 1449, 1345, 1305, 1247, 1160, 1093, 1056,

1017, 896, 848, 814, 708, 664  $\text{cm}^{-1}$ . HRMS (ESI) Calcd. for  $\text{C}_{26}\text{H}_{35}\text{NO}_4\text{ISF}_2$  requires  $[\text{M}+\text{H}]^+$ : 622.1294, Found: 622.1293.

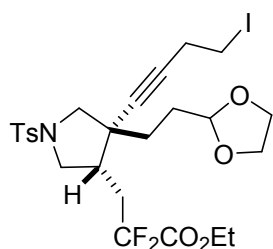

**Compound 2g:** colorless oil (72.9 mg, 57%).  $^1\text{H}$  NMR (400 MHz,  $\text{CDCl}_3$ , TMS)  $\delta$  7.73 (d,  $J = 7.9$  Hz, 2H), 7.34 (d,  $J = 8.0$  Hz, 2H), 4.84 (t,  $J = 4.4$  Hz, 1H), 4.32 (q,  $J = 7.2$  Hz, 2H), 3.97 - 3.91 (m, 2H), 3.89 - 3.83 (m, 2H), 3.77 (t,  $J = 8.5$  Hz, 1H), 3.56 (d,  $J = 10.0$  Hz, 1H), 3.18 - 3.09 (m, 2H), 3.03 - 2.93 (m, 2H), 2.45 (s, 5H), 2.31 - 2.15 (m, 2H), 2.08 - 2.01 (m, 1H), 1.98 - 1.92 (m, 1H), 1.75 - 1.68 (m, 1H), 1.62 - 1.55 (m, 2H), 1.35 (t,  $J = 7.2$  Hz, 4H).  $^{13}\text{C}$  NMR (100 MHz,  $\text{CDCl}_3$ )  $\delta$  163.8 (t,  $J_{\text{CF}} = 32.3$  Hz), 143.3, 134.2, 129.6, 127.6, 115.6 (t,  $J_{\text{CF}} = 250.0$  Hz), 103.6, 84.6, 80.7, 64.9, 63.1, 58.7, 52.0, 45.6, 41.6, 33.8 (t,  $J_{\text{CF}} = 23.7$  Hz), 31.0, 30.3, 23.5, 21.6, 13.9, 1.8.  $^{19}\text{F}$  NMR (376 MHz,  $\text{CDCl}_3$ )  $\delta$  -103.4 (ddd,  $J_1 = 261.2$  Hz,  $J_2 = 24.7$  Hz,  $J_3 = 10.2$  Hz), -106.2 (ddd,  $J_1 = 261.2$  Hz,  $J_2 = 22.9$  Hz,  $J_3 = 14.6$  Hz). IR (neat)  $\nu$  2940, 2878, 1765, 1597, 1474, 1450, 1344, 1306, 1160, 1093, 1059, 942, 814, 708  $\text{cm}^{-1}$ . HRMS (ESI) Calcd. for  $\text{C}_{25}\text{H}_{32}\text{NO}_6\text{F}_2\text{NaSI}$  requires  $[\text{M}+\text{Na}]^+$ : 662.0852, Found: 622.0855.

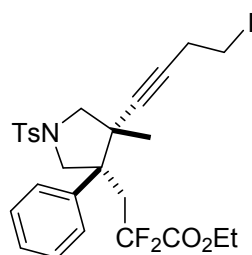

**Compound 2h:** colorless oil (100.7 mg, 80%).  $^1\text{H}$  NMR (400 MHz,  $\text{CDCl}_3$ , TMS)  $\delta$  7.81 (d,  $J = 8.0$  Hz, 2H), 7.40 (d,  $J = 7.6$  Hz, 2H), 7.36 (d,  $J = 8.0$  Hz, 2H), 7.30 - 7.23 (m, 3H), 3.95 (q,  $J = 10.5$  Hz, 2H), 3.79 - 3.61 (m, 2H), 3.54 (d,  $J = 10.2$  Hz, 1H), 3.24 (d,  $J = 10.2$  Hz, 1H), 3.20 - 3.07 (m, 3H), 2.69 - 2.60 (m, 2H), 2.45 (s, 4H), 1.13 (t,  $J = 7.1$  Hz, 3H), 0.81 (s, 3H).  $^{13}\text{C}$  NMR (150 MHz,  $\text{CDCl}_3$ )  $\delta$  163.3 (t,  $J_{\text{CF}} = 31.8$  Hz), 136.8, 129.8, 128.1, 128.0, 127.7, 127.5, 110.8 (dd,  $J_1 = 262.2$  Hz,  $J_2 = 300.5$  Hz), 84.7, 83.5, 62.7, 58.2, 53.5, 51.0, 50.9, 45.7, 39.6 (dd,  $J_1 = 21.0$  Hz,  $J_2 = 24.8$  Hz), 23.8, 22.2, 21.6, 13.6, 1.7.  $^{19}\text{F}$  NMR (564 MHz,  $\text{CDCl}_3$ )  $\delta$  -93.1 (dt,  $J_1 = 264.8$  Hz,  $J_2 = 12.6$  Hz), -105.5 (ddd,  $J_1 = 265.9$  Hz,  $J_2 = 27.2$  Hz,  $J_3 = 12.7$  Hz). IR (neat)  $\nu$  2950, 2917, 2870, 2837, 2341, 2160, 1974, 1717,

1653, 1636, 1559, 1540, 1457, 1376, 1347, 1168, 1057, 973, 893, 815  $\text{cm}^{-1}$ . HRMS (ESI) Calcd. for  $\text{C}_{27}\text{H}_{30}\text{NO}_4\text{F}_2\text{NaSI}$  requires  $[\text{M}+\text{Na}]^+$ : 652.0798, Found: 652.0801.

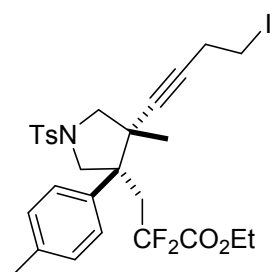

**Compound 2j:** colorless oil (106.8 mg, 83%).  $^1\text{H}$  NMR (400 MHz,  $\text{CDCl}_3$ , TMS)  $\delta$  7.81 (d,  $J = 8.2$  Hz, 2H), 7.36 (d,  $J = 8.0$  Hz, 2H), 7.28 (d,  $J = 6.0$  Hz, 2H), 7.08 (d,  $J = 8.0$  Hz, 2H), 3.96 - 3.89 (m, 2H), 3.79 - 3.61 (m, 2H), 3.52 (d,  $J = 10.2$  Hz, 1H), 3.22 (d,  $J = 10.2$  Hz, 1H), 3.18 - 3.04 (m, 3H), 2.65 - 2.60 (m, 2H), 2.44 (s, 4H), 2.30 (s, 3H), 1.13 (t,  $J = 7.2$  Hz, 3H), 0.80 (s, 3H).  $^{13}\text{C}$  NMR (150 MHz,  $\text{CDCl}_3$ )  $\delta$  163.3 (t,  $J_{\text{CF}} = 32.6$  Hz), 143.6, 137.3, 134.2, 133.6, 129.7, 128.7, 128.0, 127.8, 127.5, 115.8 (dd,  $J_1 = 244.2$  Hz,  $J_2 = 255.3$  Hz), 84.6, 83.5, 62.6, 58.1, 53.6, 50.7, 45.7, 39.6 (dd,  $J_1 = 20.6$  Hz,  $J_2 = 24.9$  Hz), 23.7, 22.1, 21.5, 20.9, 13.5, 1.7.  $^{19}\text{F}$  NMR (564 MHz,  $\text{CDCl}_3$ )  $\delta$  -93.1 (dt,  $J_1 = 264.3$  Hz,  $J_2 = 12.0$  Hz), -105.6 (ddd,  $J_1 = 264.5$  Hz,  $J_2 = 27.6$  Hz,  $J_3 = 12.6$  Hz). IR (neat)  $\nu$  2360, 2342, 1763, 1717, 1684, 1653, 1559, 1540, 1507, 1457, 1375, 1346, 1198, 1167, 1090, 1057, 1027  $\text{cm}^{-1}$ . HRMS (ESI) Calcd. for  $\text{C}_{28}\text{H}_{32}\text{NO}_4\text{F}_2\text{NaSI}$  requires  $[\text{M}+\text{Na}]^+$ : 666.0959, Found: 666.0957.

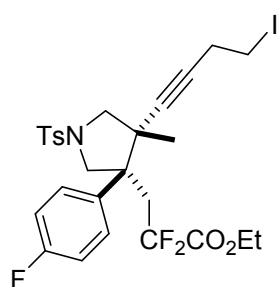

**Compound 2k:** colorless oil (94.5 mg, 73%).  $^1\text{H}$  NMR (400 MHz,  $\text{CDCl}_3$ , TMS)  $\delta$  7.81 (d,  $J = 8.0$  Hz, 2H), 7.42 - 7.36 (m, 4H), 6.98 (t,  $J = 8.5$  Hz, 2H), 3.97 (d,  $J = 10.4$  Hz, 1H), 3.88 (d,  $J = 10.1$  Hz, 1H), 3.85 - 3.75 (m, 2H), 3.54 (d,  $J = 10.2$  Hz, 1H), 3.23 (d,  $J = 10.2$  Hz, 1H), 3.14 - 3.03 (m, 3H), 2.71 - 2.58 (m, 2H), 2.44 (s, 4H), 1.17 (t,  $J = 7.2$  Hz, 3H), 0.80 (s, 3H).  $^{13}\text{C}$  NMR (100 MHz,  $\text{CDCl}_3$ )  $\delta$  163.3 (t,  $J_{\text{CF}} = 32.1$  Hz), 161.9 (d,  $J_{\text{CF}} = 246.4$  Hz), 143.7, 134.0, 132.7 (d,  $J_{\text{CF}} = 8.5$  Hz), 129.75, 129.70 (d,  $J_{\text{CF}} = 3.4$  Hz), 127.5, 115.6 (dd,  $J_1 = 246.0$  Hz,  $J_2 = 255.5$  Hz), 114.9 (d,  $J_{\text{CF}} = 21.0$  Hz), 84.9, 83.1, 62.8, 58.1, 53.6, 50.6, 45.7, 39.4 (dd,  $J_1 = 20.6$  Hz,  $J_2 = 24.9$  Hz), 23.7, 22.1, 21.5, 13.6, 1.8.  $^{19}\text{F}$  NMR (376 MHz,  $\text{CDCl}_3$ )  $\delta$  -94.1 (dt,  $J_1 = 265.7$  Hz,  $J_2 = 13.0$  Hz), -105.2 (ddd,  $J_1 = 265.3$  Hz,  $J_2 = 24.6$  Hz,

$J_3 = 13.9$  Hz), -114.1 - -114.2 (m). IR (neat)  $\nu$  2359, 2257, 1764, 1599, 1514, 1377, 1347, 1305, 1226, 1205, 1166, 1091, 1058, 1017  $\text{cm}^{-1}$ . HRMS (ESI) Calcd. for  $\text{C}_{27}\text{H}_{30}\text{NO}_4\text{F}_3\text{SI}$  requires  $[\text{M}+\text{H}]^+$ : 648.0891, Found: 648.0887.

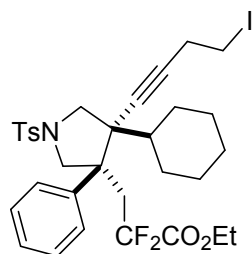

**Compound 2l:** colorless oil (69.8 mg, 50%).  $^1\text{H}$  NMR (600 MHz,  $\text{CDCl}_3$ , TMS)  $\delta$  7.82 (d,  $J = 8.3$  Hz, 2H), 7.46 (d,  $J = 7.7$  Hz, 2H), 7.38 (d,  $J = 7.9$  Hz, 2H), 7.34 (t,  $J = 7.5$  Hz, 2H), 7.29 (t,  $J = 7.3$  Hz, 1H), 4.16 (d,  $J = 10.3$  Hz, 1H), 3.73 (dq,  $J_1 = 10.8$ ,  $J_2 = 7.2$  Hz, 1H), 3.67 (d,  $J = 10.4$  Hz, 1H), 3.56 (dq,  $J_1 = 10.7$ ,  $J_2 = 7.2$  Hz, 1H), 3.49 (d,  $J = 10.5$  Hz, 1H), 3.23 - 3.14 (m, 1H), 3.00 - 2.96 (m, 4H), 2.48 (s, 3H), 2.36 (td,  $J_1 = 7.1$ ,  $J_2 = 2.7$  Hz, 2H), 1.89 (d,  $J = 12.4$  Hz, 1H), 1.72 - 1.70 (m, 1H), 1.56 - 1.54 (m, 2H), 1.43 - 1.37 (m, 1H), 1.26 - 1.19 (m, 1H), 1.13 (t,  $J = 7.2$  Hz, 4H), 1.10 - 1.06 (m, 2H), 0.98 - 0.95 (m, 2H).  $^{13}\text{C}$  NMR (150 MHz,  $\text{CDCl}_3$ )  $\delta$  163.8 (t,  $J_{\text{CF}} = 31.8$  Hz), 143.2, 136.8, 134.8, 129.6, 128.3, 127.9, 127.80, 127.78, 115.6 (dd,  $J_1 = 246.9$  Hz,  $J_2 = 256.4$  Hz), 85.9, 81.4, 62.8, 56.6, 55.6, 55.3, 52.5, 41.0 (dd,  $J_1 = 21.9$  Hz,  $J_2 = 26.1$  Hz), 40.6, 29.7, 29.6, 26.1, 25.7, 25.6, 23.7, 21.7, 13.6, 1.5.  $^{19}\text{F}$  NMR (564 MHz,  $\text{CDCl}_3$ )  $\delta$  -94.5 (dt,  $J_1 = 256.5$  Hz,  $J_2 = 12.5$  Hz), -103.3 (ddd,  $J_1 = 255.8$  Hz,  $J_2 = 24.9$  Hz,  $J_3 = 15.9$  Hz). IR (neat)  $\nu$  2360, 2341, 1762, 1649, 1597, 1553, 1471, 1450, 1308, 1295, 1233, 1099, 1053, 1019, 844  $\text{cm}^{-1}$ . HRMS (ESI) Calcd. for  $\text{C}_{32}\text{H}_{39}\text{NO}_4\text{SIF}_2$  requires  $[\text{M}+\text{H}]^+$ : 698.1608, Found: 698.1607.

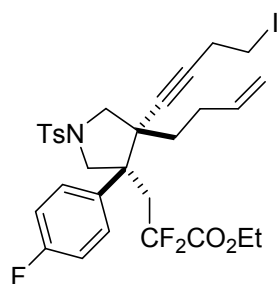

**Compound 2m:** colorless oil (74.3 mg, 54%).  $^1\text{H}$  NMR (400 MHz,  $\text{CDCl}_3$ , TMS)  $\delta$  7.81 (d,  $J = 8.1$  Hz, 2H), 7.40 - 7.36 (m, 4H), 6.99 (t,  $J = 8.6$  Hz, 2H), 5.58 - 5.48 (m, 1H), 4.89 - 4.84 (m, 2H), 3.96 (d,  $J = 10.3$  Hz, 1H), 3.90 - 3.77 (m, 3H), 3.49 (d,  $J = 10.5$  Hz, 1H), 3.20 (d,  $J = 10.5$  Hz, 1H), 3.12 - 3.03 (m, 3H), 2.61 - 2.57 (m, 2H), 2.46 (s, 4H), 2.27 - 2.20 (m, 1H), 1.84 - 1.74 (m, 1H), 1.18 (t,  $J = 7.1$  Hz,

4H), 0.74 (td,  $J_1 = 12.4$ ,  $J_2 = 5.1$  Hz, 1H).  $^{13}\text{C}$  NMR (100 MHz,  $\text{CDCl}_3$ )  $\delta$  163.5 (t,  $J_{\text{CF}} = 31.9$  Hz), 160.8 (d,  $J_{\text{CF}} = 283.3$  Hz), 143.7, 137.3, 134.2, 132.4, 130.0 (d,  $J_{\text{CF}} = 8.0$  Hz), 129.8, 127.5, 115.7 (dd,  $J_1 = 259.0$  Hz,  $J_2 = 283.3$  Hz), 115.2, 115.0 (d,  $J_{\text{CF}} = 20.6$  Hz), 86.5, 81.6, 62.9, 55.5, 54.2, 51.4, 51.3, 50.5, 39.6 (dd,  $J_1 = 22.7$  Hz,  $J_2 = 27.1$  Hz), 32.6, 30.3, 23.7, 21.6, 13.7, 1.5.  $^{19}\text{F}$  NMR (376 MHz,  $\text{CDCl}_3$ )  $\delta$  -94.6 (dt,  $J_1 = 267.5$  Hz,  $J_2 = 13.1$  Hz), -104.4 (ddd,  $J_1 = 263.6$  Hz,  $J_2 = 24.0$  Hz,  $J_3 = 14.8$  Hz), -114.0 - -114.2. (m). IR (neat)  $\nu$  2920, 2848, 1765, 1514, 1347, 1305, 1232, 1164, 1094, 1016, 815  $\text{cm}^{-1}$ . HRMS (ESI) Calcd. for  $\text{C}_{30}\text{H}_{33}\text{NO}_4\text{F}_3\text{NaSI}$  requires  $[\text{M}+\text{Na}]^+$ : 710.1016, Found: 710.1019.

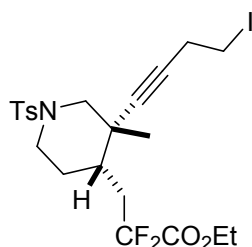

**Compound 2m:** colorless oil (48.8 mg, 43%).  $^1\text{H}$  NMR (400 MHz,  $\text{CDCl}_3$ , TMS)  $\delta$  7.64 (d,  $J = 8.0$  Hz, 2H), 7.32 (d,  $J = 7.8$  Hz, 2H), 4.30 (q,  $J = 7.1$  Hz, 3H), 3.72 (t,  $J = 12.1$  Hz, 2H), 3.24 (t,  $J = 7.1$  Hz, 2H), 2.77 (td,  $J = 7.1$ , 3.2 Hz, 2H), 2.44 (s, 4H), 2.38 - 2.20 (m, 2H), 2.08 - 2.01 (m, 2H), 1.87 - 1.84 (m, 2H), 1.34 (t,  $J = 7.1$  Hz, 4H), 1.15 (s, 3H).  $^{13}\text{C}$  NMR (150 MHz,  $\text{CDCl}_3$ )  $\delta$  164.2 (t,  $J_{\text{CF}} = 31.7$  Hz), 143.5, 133.6, 129.6, 127.6, 116.2 (t,  $J_{\text{CF}} = 249.6$  Hz), 83.2, 82.5, 63.0, 56.6, 46.0, 38.7, 36.3, 35.8 (t,  $J_{\text{CF}} = 22.2$  Hz), 29.3, 24.8, 23.9, 21.5, 14.0, 2.9.  $^{19}\text{F}$  NMR (564 MHz,  $\text{CDCl}_3$ )  $\delta$  -103.4 (ddd,  $J_1 = 259.3$  Hz,  $J_2 = 24.1$  Hz,  $J_3 = 12.5$  Hz), -105.4 (ddd,  $J_1 = 259.0$  Hz,  $J_2 = 22.7$  Hz,  $J_3 = 16.0$  Hz). HRMS (ESI) Calcd. for  $\text{C}_{22}\text{H}_{32}\text{N}_2\text{O}_4\text{SIF}_2$  requires  $[\text{M}+\text{NH}_4]^+$ : 585.1090, Found: 585.1088.

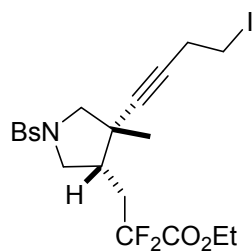

**Compound 2n:** colorless oil (94.0 mg, 76%).  $^1\text{H}$  NMR (400 MHz,  $\text{CDCl}_3$ , TMS)  $\delta$  7.74 - 7.67 (m, 4H), 4.33 (q,  $J = 7.1$  Hz, 2H), 3.78 (t,  $J = 8.1$  Hz, 1H), 3.58 (d,  $J = 10.1$  Hz, 1H), 3.17 (d,  $J = 10.2$  Hz, 1H), 3.12 - 2.98 (m, 3H), 2.55 - 2.40 (m, 2H), 2.32 - 2.13 (m, 2H), 2.07 - 1.99 (m, 1H), 1.36 (t,  $J = 7.1$  Hz, 3H), 1.23 (s, 3H).  $^{13}\text{C}$  NMR (150 MHz,  $\text{CDCl}_3$ )  $\delta$  163.8 (t,  $J_{\text{CF}} = 32.3$  Hz), 136.2, 132.3, 129.1, 127.6, 115.6 (t,  $J_{\text{CF}} = 250.4$  Hz), 83.4, 82.0, 63.2, 59.9, 52.2, 42.3, 41.6, 34.1, 33.6 (t,  $J_{\text{CF}} = 23.4$  Hz), 23.4, 22.8, 22.3, 14.1, 14.0, 2.3.  $^{19}\text{F}$  NMR (564 MHz,  $\text{CDCl}_3$ )  $\delta$  -103.5 (ddd,  $J_1 = 262.0$  Hz,  $J_2 = 25.3$  Hz,  $J_3$

= 10.1 Hz), -106.1 (ddd,  $J_1 = 262.0$  Hz,  $J_2 = 22.9$  Hz,  $J_3 = 15.3$  Hz). IR (neat)  $\nu$  2977, 2920, 2850, 2360, 2339, 1765, 1658, 1574, 1471, 1430, 1389, 1341, 1300, 1275, 1197, 1166, 1090, 1066, 1009, 824, 810, 770, 737, 704  $\text{cm}^{-1}$ . HRMS (ESI) Calcd. for  $\text{C}_{20}\text{H}_{24}\text{NO}_4\text{BrSIF}_2$  requires  $[\text{M}+\text{H}]^+$ : 617.9617, Found: 617.9615.

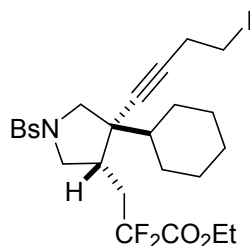

**Compound 2o:** colorless oil (78.2 mg, 57%).  $^1\text{H}$  NMR (400 MHz,  $\text{CDCl}_3$ , TMS)  $\delta$  7.73 - 7.66 (m, 4H), 4.33 (q,  $J = 7.2$  Hz, 2H), 3.75 (t,  $J = 8.2$  Hz, 1H), 3.31 (s, 2H), 3.09 - 2.99 (m, 3H), 2.51 (q,  $J = 6.8$  Hz, 2H), 2.38 - 2.18 (m, 3H), 1.98 (d,  $J = 12.7$  Hz, 1H), 1.78 (d,  $J = 12.6$  Hz, 2H), 1.67 (d,  $J = 11.6$  Hz, 1H), 1.54 (s, 1H), 1.36 (t,  $J = 7.1$  Hz, 4H), 1.26 - 1.11 (m, 3H), 1.03 - 0.88 (m, 3H).  $^{13}\text{C}$  NMR (150 MHz,  $\text{CDCl}_3$ )  $\delta$  163.8 (t,  $J_{\text{CF}} = 31.8$  Hz), 135.9, 132.2, 129.1, 127.6, 115.7 (t,  $J_{\text{CF}} = 249.6$  Hz), 84.1, 81.9, 63.2, 55.5, 52.3, 49.6, 42.7, 37.1, 34.1 (t,  $J_{\text{CF}} = 23.4$  Hz), 29.5, 26.7, 26.5, 26.2, 26.1, 23.5, 14.0, 2.6.  $^{19}\text{F}$  NMR (564 MHz,  $\text{CDCl}_3$ )  $\delta$  -102.8 (ddd,  $J_1 = 262.3$  Hz,  $J_2 = 24.2$  Hz,  $J_3 = 9.2$  Hz), -106.1 (ddd,  $J_1 = 261.9$  Hz,  $J_2 = 23.0$  Hz,  $J_3 = 15.4$  Hz). IR (neat)  $\nu$  2954, 2921, 2852, 2360, 1766, 1575, 1471, 1389, 1350, 1289, 1253, 1196, 1068, 1008, 888, 848, 814, 737, 705  $\text{cm}^{-1}$ . HRMS (ESI) Calcd. for  $\text{C}_{25}\text{H}_{32}\text{NO}_4\text{BrSIF}_2$  requires  $[\text{M}+\text{H}]^+$ : 686.0243, Found: 686.0243.

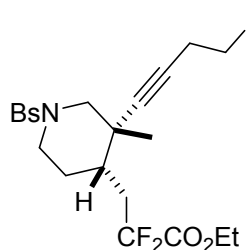

**Compound 2p:** colorless oil (50.6 mg, 40%).  $^1\text{H}$  NMR (400 MHz,  $\text{CDCl}_3$ , TMS)  $\delta$  7.68 - 7.61 (m, 4H), 4.31 (q,  $J = 7.1$  Hz, 2H), 3.77 - 3.69 (m, 2H), 3.24 (t,  $J = 7.0$  Hz, 2H), 2.77 (td,  $J = 7.0, 1.8$  Hz, 2H), 2.42 - 2.24 (m, 2H), 2.14 - 1.98 (m, 2H), 1.93 - 1.85 (m, 2H), 1.34 (t,  $J = 7.1$  Hz, 4H), 1.16 (s, 3H).  $^{13}\text{C}$  NMR (100 MHz,  $\text{CDCl}_3$ )  $\delta$  164.1 (t,  $J_{\text{CF}} = 32.6$  Hz), 135.9, 132.4, 129.0, 127.8, 118.7, 116.2 (t,  $J_{\text{CF}} = 249.8$  Hz), 113.7, 83.4, 82.4, 63.0, 56.5, 46.0, 38.8, 35.8 (t,  $J_{\text{CF}} = 22.5$  Hz), 29.3, 24.8, 23.9, 14.0, 2.8.  $^{19}\text{F}$  NMR (376 MHz,  $\text{CDCl}_3$ )  $\delta$  -103.3 (ddd,  $J_1 = 258.6$  Hz,  $J_2 = 24.3$  Hz,  $J_3 = 11.7$  Hz), -105.4 (ddd,  $J_1$

= 259.8 Hz,  $J_2 = 23.0$  Hz,  $J_3 = 15.5$  Hz). IR (neat)  $\nu$  2961, 2909, 2853, 2244, 1715, 1683, 1453, 1366, 1289, 1254, 1118, 1082, 1048, 917  $\text{cm}^{-1}$ . HRMS (ESI) Calcd. for  $\text{C}_{21}\text{H}_{26}\text{NO}_4\text{BrSIF}_2$  requires  $[\text{M}+\text{H}]^+$ : 631.9783, Found: 631.9773.

## 9. Spectroscopy of compounds 3

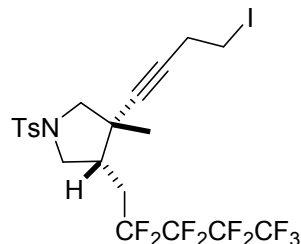

**Compound 3a:** colorless oil (90.9 mg, 70%). <sup>1</sup>H NMR (400 MHz, CDCl<sub>3</sub>, TMS) δ 7.75 (d, *J* = 8.1 Hz, 2H), 7.34 (d, *J* = 7.9 Hz, 2H), 3.78 (t, *J* = 8.4 Hz, 1H), 3.62 (d, *J* = 10.1 Hz, 1H), 3.18 (d, *J* = 10.5 Hz, 1H), 3.13 (d, *J* = 9.9 Hz, 1H), 3.04 - 2.93 (m, 2H), 2.50 - 2.40 (m, 5H), 2.31 - 2.05 (m, 3H), 1.24 (s, 3H). <sup>13</sup>C NMR (100 MHz, CDCl<sub>3</sub>) δ 143.4, 134.2, 129.6, 127.6, 83.6, 81.8, 59.8, 52.1 (d, *J*<sub>CF</sub> = 4.4 Hz), 41.6, 41.4, 30.9 (t, *J*<sub>CF</sub> = 21.9 Hz), 23.5, 22.9, 21.6, 1.8. <sup>19</sup>F NMR (376 MHz, CDCl<sub>3</sub>) δ -81.0 (t, *J* = 9.6 Hz), -111.1 - -112.1 (m), -113.4 - -114.4 (m), -124.1 (s), -125.8 - -126.0 (m). IR (neat) ν 2962, 2928, 2850, 1598, 1438, 1349, 1258, 1233, 1159, 1132, 1092, 1016, 880, 792, 737, 722, 707, 665 cm<sup>-1</sup>. HRMS (ESI) Calcd. for C<sub>21</sub>H<sub>22</sub>NO<sub>4</sub>SIF<sub>9</sub> requires [M+H]<sup>+</sup>: 650.0267, Found: 650.0273.

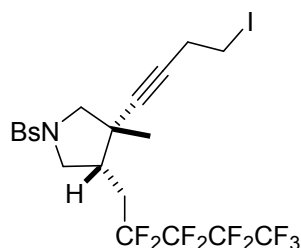

**Compound 3b:** colorless oil (92.9 mg, 65%). <sup>1</sup>H NMR (400 MHz, CDCl<sub>3</sub>, TMS) δ 7.75 - 7.68 (m, 4H), 3.80 (t, *J* = 6.9 Hz, 1H), 3.60 (d, *J* = 10.1 Hz, 1H), 3.20 (d, *J* = 10.1 Hz, 1H), 3.13 (t, *J* = 9.9 Hz, 1H), 3.06 - 2.97 (m, 2H), 2.57 - 2.40 (m, 2H), 2.32 - 2.15 (m, 3H), 1.26 (s, 3H). <sup>13</sup>C NMR (100 MHz, CDCl<sub>3</sub>) δ 136.2, 132.3, 129.0, 127.7, 83.7, 81.6, 59.8, 52.1 (d, *J*<sub>CF</sub> = 4.5 Hz), 41.6, 41.4, 30.3, 30.1 (t, *J*<sub>CF</sub> = 21.7 Hz), 29.9, 23.4, 22.7, 2.2. <sup>19</sup>F NMR (376 MHz, CDCl<sub>3</sub>) δ -81.0 (t, *J* = 10.3 Hz), -110.8 - -114.5 (m), -124.0 (s), -125.6 - -126.1 (m). IR (neat) ν 2976, 2920, 2863, 2360, 1763, 1574, 1466, 1387, 1350, 1302, 1300, 1214, 1196, 1161, 1134, 1096, 1088, 1045, 1019, 1005, 991, 906, 875, 855, 812, 737, 722, 704, 691, 668 cm<sup>-1</sup>. HRMS (ESI) Calcd. for C<sub>20</sub>H<sub>19</sub>NO<sub>4</sub>SBrIF<sub>2</sub> requires [M+H]<sup>+</sup>: 713.9215, Found: 713.9213.



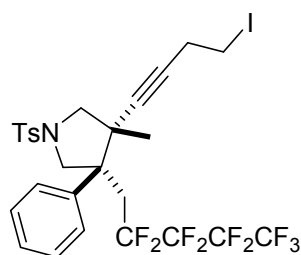

**Compound 3c:** colorless oil (133.5 mg, 92%).  $^1\text{H}$  NMR (400 MHz,  $\text{CDCl}_3$ , TMS)  $\delta$  7.81 (d,  $J = 8.2$  Hz, 2H), 7.42 (d,  $J = 6.7$  Hz, 2H), 7.36 (d,  $J = 8.0$  Hz, 2H), 7.33 - 7.29 (m, 3H), 4.03 (dd,  $J = 10.2$ , 1.9 Hz, 1H), 3.91 (d,  $J = 10.3$  Hz, 1H), 3.58 (d,  $J = 10.3$  Hz, 1H), 3.24 (d,  $J = 10.3$  Hz, 1H), 3.09 (td,  $J = 6.9$ , 1.9 Hz, 3H), 2.69 - 2.55 (m, 3H), 2.45 (s, 3H), 0.82 (s, 3H).  $^{13}\text{C}$  NMR (100 MHz,  $\text{CDCl}_3$ )  $\delta$  143.7, 137.4, 134.4, 129.7, 128.2, 127.6, 127.5, 127.2, 84.9, 83.3, 57.9, 53.5 (d,  $J = 7.6$  Hz), 51.0, 46.0, 35.1 (t,  $J_{\text{CF}} = 18.9$  Hz), 23.7, 22.0, 21.5, 1.4.  $^{19}\text{F}$  NMR (376 MHz,  $\text{CDCl}_3$ )  $\delta$  -81.1 (t,  $J = 10.0$  Hz), -108.4 - -111.8 (m), -124.1 (s), -125.8 (s). IR (neat)  $\nu$  2257, 1764, 1598, 1463, 1375, 1344, 1305, 1249, 1189, 1161, 1095, 1057, 1017  $\text{cm}^{-1}$ . HRMS (ESI) Calcd. for  $\text{C}_{27}\text{H}_{26}\text{NO}_2\text{F}_9\text{SI}$  requires  $[\text{M}+\text{H}]^+$ : 726.0576, Found: 726.0580.

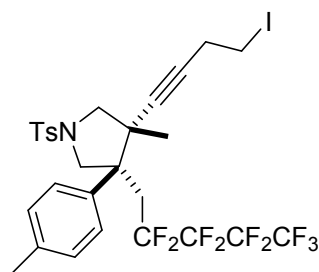

**Compound 3d:** colorless oil (137.5 mg, 93%).  $^1\text{H}$  NMR (400 MHz,  $\text{CDCl}_3$ , TMS)  $\delta$  7.81 (d,  $J = 8.0$  Hz, 2H), 7.36 (d,  $J = 7.9$  Hz, 2H), 7.29 (d,  $J = 8.1$  Hz, 2H), 7.11 (d,  $J = 8.0$  Hz, 2H), 4.01 (dd,  $J = 10.2$ , 2.0 Hz, 1H), 3.87 (d,  $J = 10.2$  Hz, 1H), 3.56 (d,  $J = 10.2$  Hz, 1H), 3.22 (d,  $J = 10.2$  Hz, 1H), 3.15-2.93 (m, 3H), 2.73 - 2.51 (m, 3H), 2.45 (s, 3H), 2.32 (s, 3H), 0.81 (s, 3H).  $^{13}\text{C}$  NMR (100 MHz,  $\text{CDCl}_3$ )  $\delta$  143.6, 137.3, 134.5, 134.2, 129.7, 128.9, 127.5, 127.1, 84.7, 83.4, 57.9, 53.7 (d,  $J_{\text{CF}} = 7.7$  Hz), 50.8, 46.0, 35.0 (t,  $J_{\text{CF}} = 18.4$  Hz), 23.7, 21.9, 21.6, 20.9, 1.4.  $^{19}\text{F}$  NMR (376 MHz,  $\text{CDCl}_3$ )  $\delta$  -81.1 (t,  $J = 9.6$  Hz), -108.9 - -111.6 (m), -124.1 (s), -125.8 (s). IR (neat)  $\nu$  2257, 1457, 1376, 1237, 1168, 904, 727, 667  $\text{cm}^{-1}$ . HRMS (ESI) Calcd. for  $\text{C}_{28}\text{H}_{28}\text{NO}_2\text{F}_9\text{SI}$  requires  $[\text{M}+\text{H}]^+$ : 740.0746, Found: 740.0736.

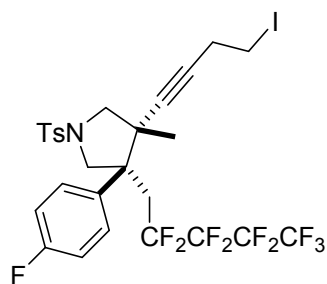

**Compound 3e:** colorless oil (121.9 mg, 82%).  $^1\text{H}$  NMR (400 MHz,  $\text{CDCl}_3$ , TMS)  $\delta$  7.80 (d,  $J = 8.0$  Hz, 2H), 7.43 - 7.36 (m, 4H), 7.01 (t,  $J = 8.5$  Hz, 2H), 3.98 (dd,  $J = 10.3, 1.9$  Hz, 1H), 3.90 (d,  $J = 10.3$  Hz, 1H), 3.58 (d,  $J = 10.3$  Hz, 1H), 3.24 (d,  $J = 10.3$  Hz, 1H), 3.09 (td,  $J = 6.8, 2.3$  Hz, 3H), 2.69 - 2.58 (m, 3H), 2.45 (s, 3H), 0.82 (s, 3H).  $^{13}\text{C}$  NMR (100 MHz,  $\text{CDCl}_3$ )  $\delta$  162.0 (d,  $J_{\text{CF}} = 245.9$  Hz), 143.8, 134.3, 133.1 (d,  $J_{\text{CF}} = 3.1$  Hz), 129.8, 129.0 (d,  $J_{\text{CF}} = 7.9$  Hz), 127.5, 115.2 (d,  $J_{\text{CF}} = 21.1$  Hz), 85.1, 83.0, 57.9, 53.7, 50.7, 46.0, 35.1 (t,  $J_{\text{CF}} = 19.0$  Hz), 23.7, 22.0, 21.5, 1.4.  $^{19}\text{F}$  NMR (376 MHz,  $\text{CDCl}_3$ )  $\delta$  -81.1 (t,  $J = 10.0$  Hz), -108.8 - -111.8 (m), -114.4 (s), -124.1 (s), -125.8 (s). IR (neat)  $\nu$  2249, 1607, 1514, 1456, 1376, 1351, 1234, 1166, 1134, 1093, 1057, 1018, 972, 907  $\text{cm}^{-1}$ . HRMS (ESI) Calcd. for  $\text{C}_{27}\text{H}_{25}\text{NO}_2\text{F}_{10}\text{SI}$  requires  $[\text{M}+\text{H}]^+$ : 744.0501, Found: 744.0486.

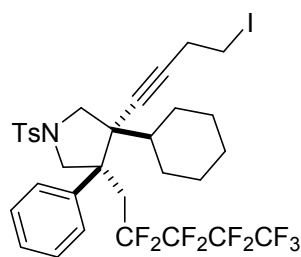

**Compound 3f:** colorless oil (76.2 mg, 48%).  $^1\text{H}$  NMR (400 MHz,  $\text{CDCl}_3$ , TMS)  $\delta$  7.82 (d,  $J = 8.2$  Hz, 2H), 7.43 (d,  $J = 6.6$  Hz, 2H), 7.39 - 7.31 (m, 5H), 4.16 (dd,  $J = 10.0, 3.0$  Hz, 1H), 3.71 (dd,  $J = 10.1, 2.1$  Hz, 1H), 3.54 (d,  $J = 10.4$  Hz, 1H), 3.29 - 3.16 (m, 1H), 3.07 (d,  $J = 10.4$  Hz, 1H), 3.03 - 2.91 (m, 3H), 2.49 (s, 3H), 2.42 - 2.36 (m, 2H), 1.85 - 1.82 (m, 1H), 1.73 - 1.71 (m, 1H), 1.62 - 1.55 (m, 4H), 1.44 - 1.38 (m, 1H), 1.28 - 1.17 (m, 3H), 1.10 - 0.96 (m, 4H).  $^{13}\text{C}$  NMR (100 MHz,  $\text{CDCl}_3$ )  $\delta$  143.3, 137.5, 134.9, 129.6, 128.5, 127.74, 127.70, 127.1, 86.1, 81.3, 56.5, 56.0 (d,  $J_{\text{CF}} = 8.6$  Hz), 55.3, 52.6, 40.6, 36.2 (t,  $J_{\text{CF}} = 19.4$  Hz), 29.6, 26.1, 25.6, 23.6, 21.7, 1.2.  $^{19}\text{F}$  NMR (376 MHz,  $\text{CDCl}_3$ )  $\delta$  -81.1 (t,  $J = 9.5$  Hz), -108.8 - -111.8 (m), -114.4 (s), -124.1 (s), -125.8 (s). IR (neat)  $\nu$  2255, 1598, 1483, 1449, 1350, 1233, 1219, 1163, 1074, 1018, 877  $\text{cm}^{-1}$ . HRMS (ESI) Calcd. for  $\text{C}_{32}\text{H}_{34}\text{NO}_2\text{F}_9\text{SI}$  requires  $[\text{M}+\text{H}]^+$ : 794.1198, Found: 794.1206.

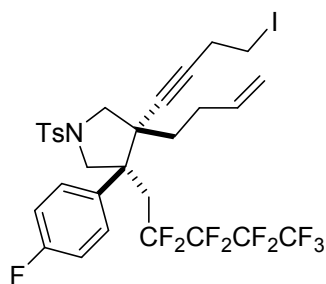

**Compound 3g:** colorless oil (75.1 mg, 45%).  $^1\text{H}$  NMR (400 MHz,  $\text{CDCl}_3$ , TMS)  $\delta$  7.81 (d,  $J = 8.2$  Hz, 2H), 7.39 - 7.36 (m, 4H), 7.01 (t,  $J = 8.6$  Hz, 2H), 5.60 - 5.50 (m, 1H), 4.89 - 4.85 (m, 2H), 4.03 (dd,  $J = 10.2, 2.3$  Hz, 1H), 3.84 (d,  $J = 10.2$  Hz, 1H), 3.54 (d,  $J = 10.5$  Hz, 1H), 3.19 (d,  $J = 10.5$  Hz, 1H), 3.08 - 2.97 (m, 3H), 2.84 - 2.70 (m, 1H), 2.58 (td,  $J = 6.9, 4.3$  Hz, 2H), 2.46 (s, 3H), 2.29 - 2.20 (m, 1H), 1.84 - 1.75 (m, 1H), 1.33 - 1.20 (m, 2H), 0.82 - 0.74 (m, 1H).  $^{13}\text{C}$  NMR (100 MHz,  $\text{CDCl}_3$ )  $\delta$  162.0 (d,  $J = 246.6$  Hz), 143.7, 137.2, 134.4, 132.8, 129.8, 129.2 (d,  $J = 7.9$  Hz), 127.5, 115.33, 115.25 (d,  $J = 21.1$  Hz), 115.2, 86.7, 81.5, 55.5, 54.3 (d,  $J = 7.6$  Hz), 51.4, 50.7, 35.1 (t,  $J = 18.9$  Hz), 32.8, 30.3, 23.7, 21.6, 1.1.  $^{19}\text{F}$  NMR (376 MHz,  $\text{CDCl}_3$ )  $\delta$  -81.1 (t,  $J = 10.2$  Hz), -108.7 - -109.4 (m), -110.0 - -110.7 (m), -114.3 (s), -124.2 (s), -125.8 (s). IR (neat)  $\nu$  1606, 1514, 1351, 1164, 1134, 1105, 1047, 1019, 913, 879  $\text{cm}^{-1}$ . HRMS (EI) Calcd. for  $\text{C}_{30}\text{H}_{29}\text{NO}_2\text{F}_{10}\text{SI}$  requires  $[\text{M}+\text{H}]^+$ : 784.0801, Found: 784.0799.

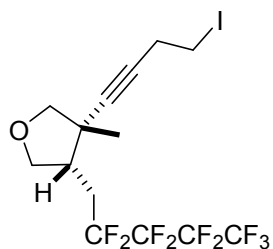

**Compound 3h:** colorless oil (22.8 mg, 23%).  $^1\text{H}$  NMR (400 MHz,  $\text{CDCl}_3$ , TMS)  $\delta$  4.24 - 4.14 (m, 1H), 3.99 (d,  $J = 8.1$  Hz, 1H), 3.70 (t,  $J = 9.0$  Hz, 1H), 3.60 (d,  $J = 8.1$  Hz, 1H), 3.21 (t,  $J = 6.9$  Hz, 2H), 2.78 (t,  $J = 6.9$  Hz, 2H), 2.56 - 2.18 (m, 3H), 1.33 (s, 3H).  $^{13}\text{C}$  NMR (150 MHz,  $\text{CDCl}_3$ )  $\delta$  83.34, 83.27, 79.6, 72.9 (d,  $J = 4.1$  Hz), 42.5, 42.2, 30.6 (t,  $J = 21.8$  Hz), 23.8, 23.1, 2.5.  $^{19}\text{F}$  NMR (564 MHz,  $\text{CDCl}_3$ ) -80.99 (s), -111.57 - -112.24 (m), -113.39 - -114.02 (m), -124.07 (s), -125.88 (s). IR (neat)  $\nu$  2918, 2867, 1458, 1376, 1233, 1133, 1045, 1022, 931, 880  $\text{cm}^{-1}$ . HRMS (ESI) Calcd. for  $\text{C}_{14}\text{H}_{15}\text{OF}_9\text{I}$  requires  $[\text{M}+\text{H}]^+$ : 496.9901, Found: 496.9897.

## 10. X-Ray crystal structure

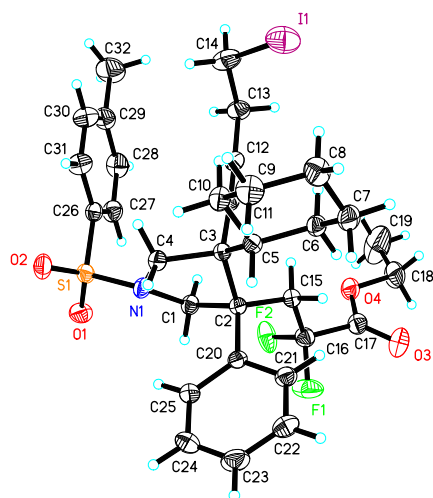

Single crystals of **2k** were grown in chloroform. Chloroform (ca. 2.0 mL) was added to **2k** (ca. 23 mg in a 4 mL vial). The 4 mL vial was capped with a needle and placed at room temperature in the experimental cabinet for 5 days, whereupon crystals formed.

The crystal data of **2k** have been deposited in CCDC with number 2047670. Empirical Formula:  $C_{32}H_{38}F_2NO_4S$ ; Formula Weight: 697.59; Crystal Color, Habit: colorless; Crystal Dimensions: 0.170 x 0.140 x 0.110 mm<sup>3</sup>; Crystal System: Monoclinic; Lattice Parameters:  $a = 34.6679(9)$  Å,  $\alpha = 90$  deg.  $b = 8.8212(2)$  Å,  $\beta = 112.0900(10)$  deg.  $c = 22.1563(5)$  Å,  $\gamma = 90$  deg;  $V = 6278.3(3)$  Å<sup>3</sup>; Space group:  $C 2/c$ ;  $Z = 8$ ;  $D_{calc} = 1.476$  g/cm<sup>3</sup>;  $F_{000} = 2848$ ; Diffractometer: Rigaku AFC7R; Residuals:  $R$ ;  $R_w$ : 0.0378, 0.0828.

|                                   |                                                                   |                    |
|-----------------------------------|-------------------------------------------------------------------|--------------------|
| Empirical formula                 | C <sub>32</sub> H <sub>38</sub> F <sub>2</sub> INO <sub>4</sub> S |                    |
| Formula weight                    | 697.59                                                            |                    |
| Temperature                       | 293(2) K                                                          |                    |
| Wavelength                        | 0.71073 Å                                                         |                    |
| Crystal system                    | Monoclinic                                                        |                    |
| Space group                       | C 2/c                                                             |                    |
| Unit cell dimensions              | a = 34.6679(9) Å                                                  | α = 90°.           |
|                                   | b = 8.8212(2) Å                                                   | β = 112.0900(10)°. |
|                                   | c = 22.1563(5) Å                                                  | γ = 90°.           |
| Volume                            | 6278.3(3) Å <sup>3</sup>                                          |                    |
| Z                                 | 8                                                                 |                    |
| Density (calculated)              | 1.476 Mg/m <sup>3</sup>                                           |                    |
| Absorption coefficient            | 1.135 mm <sup>-1</sup>                                            |                    |
| F(000)                            | 2848                                                              |                    |
| Crystal size                      | 0.170 x 0.140 x 0.110 mm <sup>3</sup>                             |                    |
| Theta range for data collection   | 2.499 to 25.998°.                                                 |                    |
| Index ranges                      | -42 ≤ h ≤ 42, -10 ≤ k ≤ 10, -27 ≤ l ≤ 27                          |                    |
| Reflections collected             | 31023                                                             |                    |
| Independent reflections           | 6139 [R(int) = 0.0369]                                            |                    |
| Completeness to theta = 25.242°   | 99.6 %                                                            |                    |
| Absorption correction             | Semi-empirical from equivalents                                   |                    |
| Max. and min. transmission        | 0.7456 and 0.6410                                                 |                    |
| Refinement method                 | Full-matrix least-squares on F <sup>2</sup>                       |                    |
| Data / restraints / parameters    | 6139 / 8 / 381                                                    |                    |
| Goodness-of-fit on F <sup>2</sup> | 1.027                                                             |                    |
| Final R indices [I > 2σ(I)]       | R1 = 0.0378, wR2 = 0.0828                                         |                    |
| R indices (all data)              | R1 = 0.0544, wR2 = 0.0933                                         |                    |
| Extinction coefficient            | n/a                                                               |                    |
| Largest diff. peak and hole       | 0.755 and -0.761 e.Å <sup>-3</sup>                                |                    |

## 11. Reference

- [1] K. Rui, S. Yang, Y. Wei, M. Shi, Rh(i)-catalyzed stereoselective intramolecular cycloaddition reactions of ene-vinylidenecyclopropanes for the construction of fused 6,5-bicyclic skeletons with a quaternary all-carbon stereocenter, *Org. Chem. Front.*, 2019, **6**, 2506-2513.
- [2] S. Yang, Q. Xu, M. Shi, Palladium-initiated radical cascade stereoselective iodofluoroalkylation/cycloisomerization of ene-vinylidenecyclopropanes, *Chem. Eur. J.*, 2016, **22**, 10387-10392.
- [3] J. Liu, Y. Wei, M. Shi, Visible light mediated synthesis of 4-aryl-1,2-dihydronaphthalene derivatives via single-electron oxidation or MHAT from methylenecyclopropanes, *Org. Chem. Front.*, 2021, **8**, 94-100.
- [4] J. Liu, Y. Wei, M. Shi, Mechanistic studies on propargyl alcohol-tethered alkylidenecyclopropane with aryldiazonium salt initiated by visible light, *Chin. J. Chem.*, 2021, **39**, 295-300.

## 12. NMR Spectroscopy

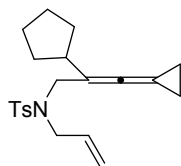

(<sup>1</sup>H NMR, 400 MHz, CDCl<sub>3</sub>)

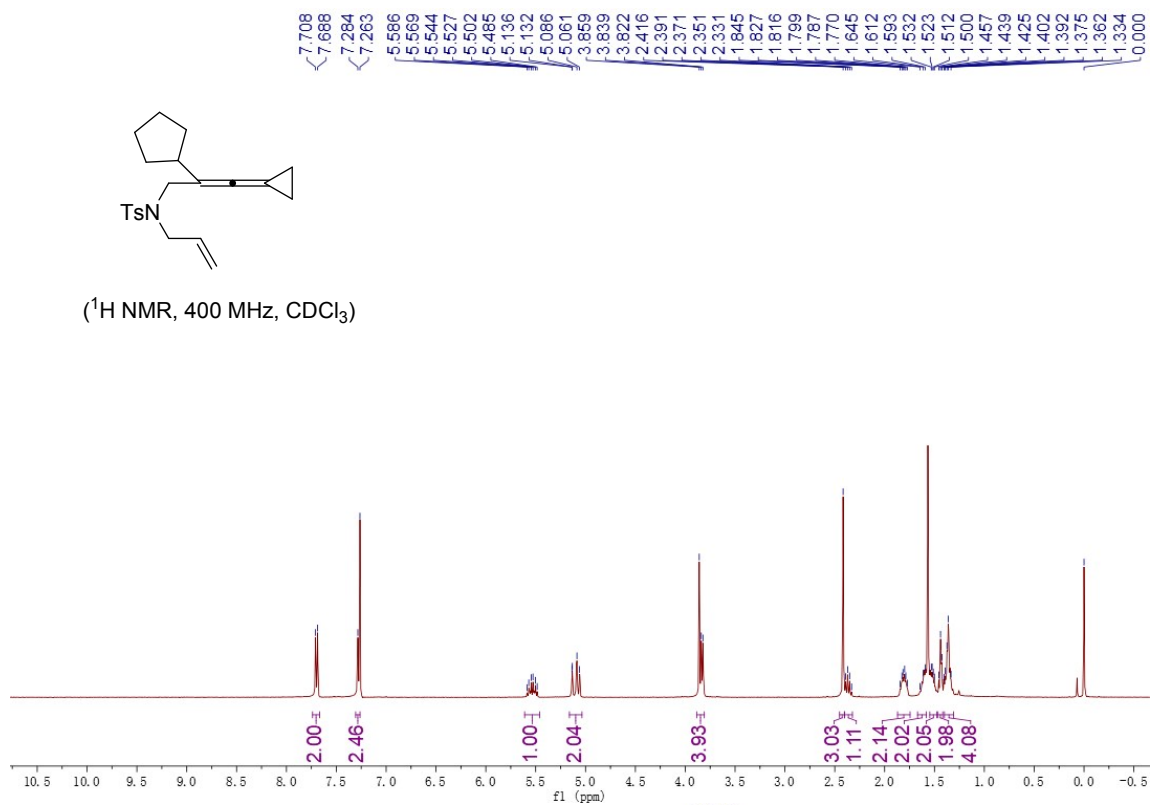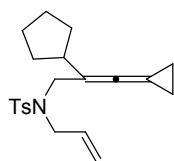

(<sup>13</sup>C NMR, 100 MHz, CDCl<sub>3</sub>)

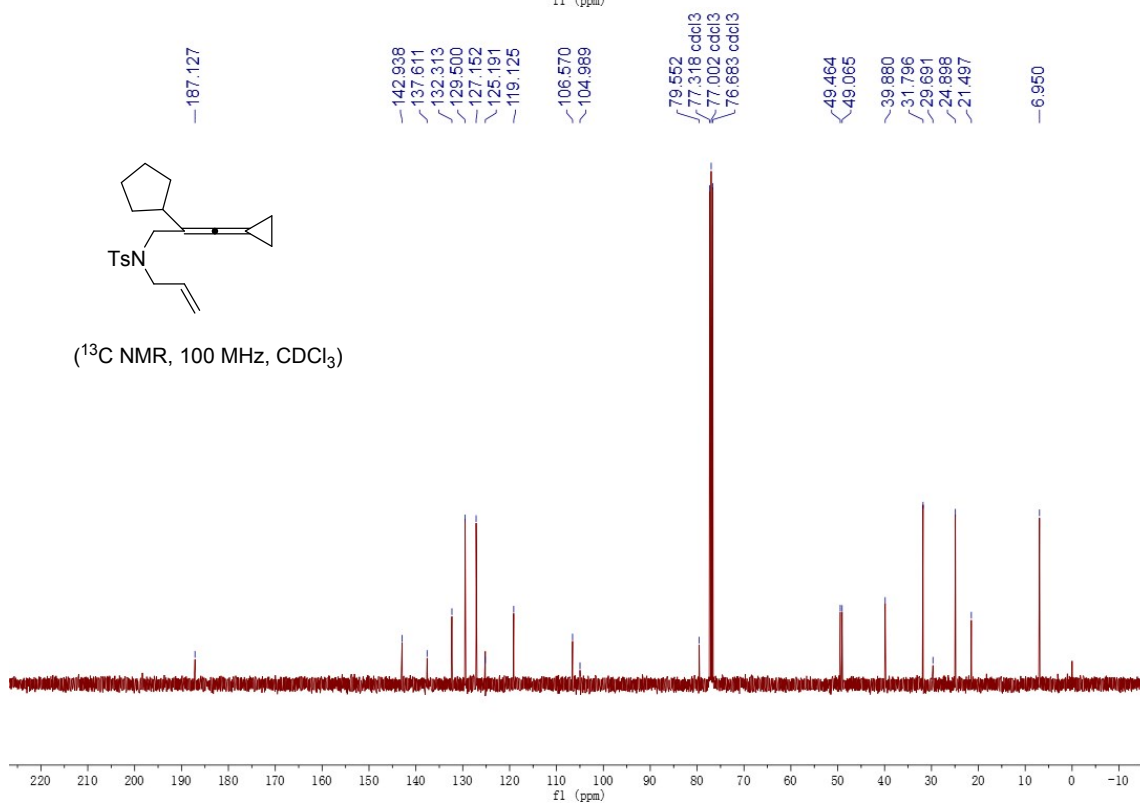

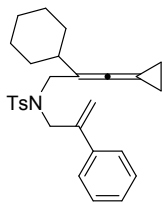

(<sup>1</sup>H NMR, 400 MHz, CDCl<sub>3</sub>)

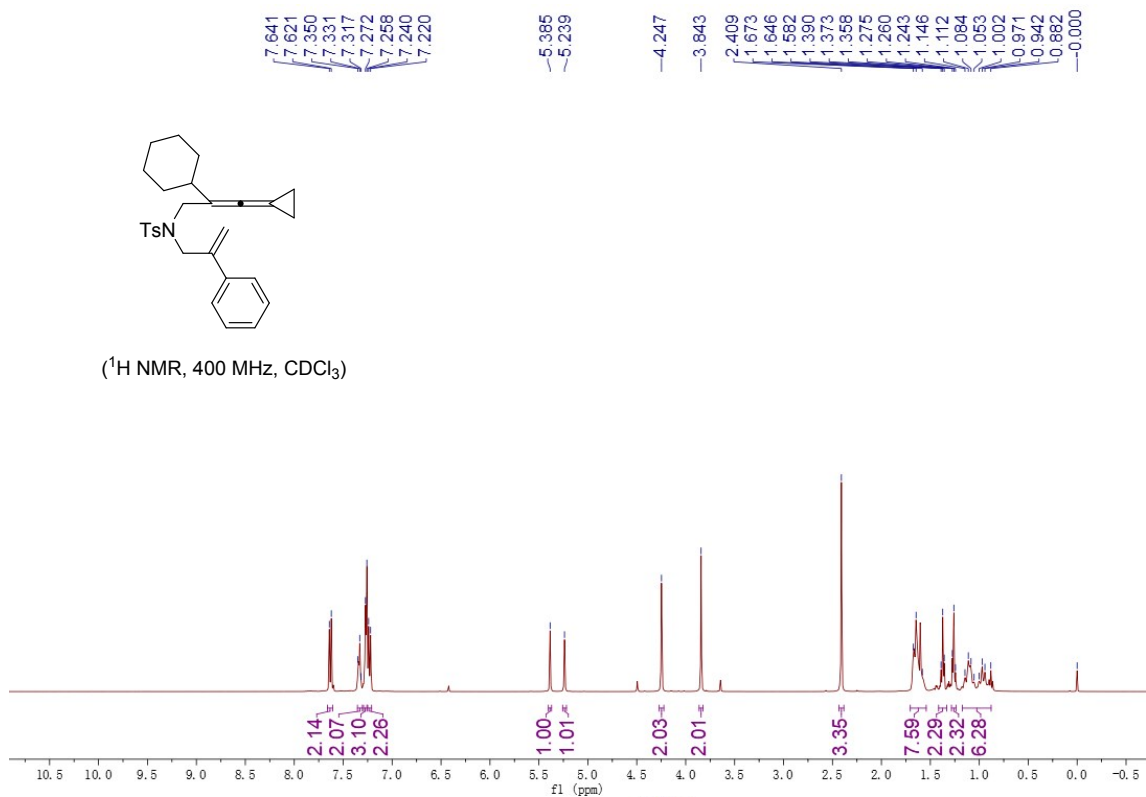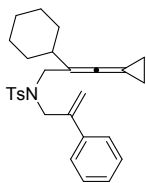

(<sup>13</sup>C NMR, 150 MHz, CDCl<sub>3</sub>)

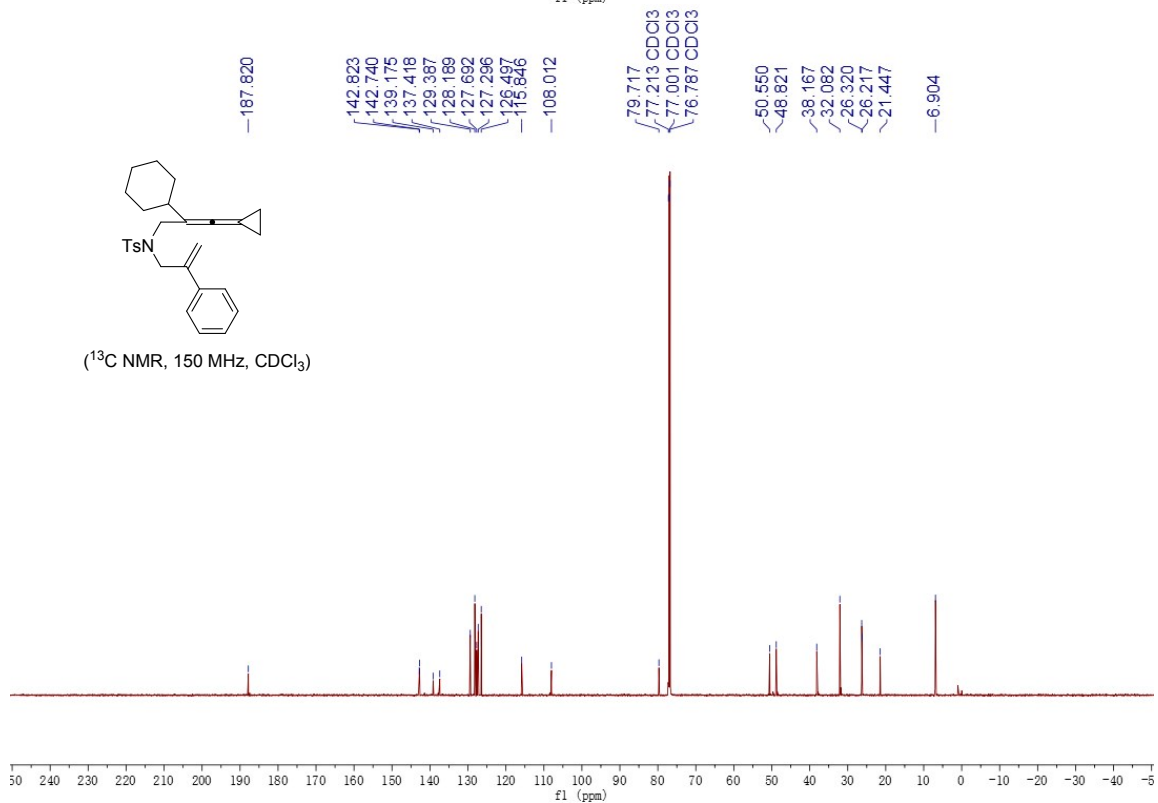



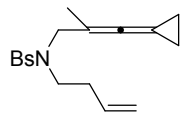

(<sup>1</sup>H NMR, 400 MHz, CDCl<sub>3</sub>)

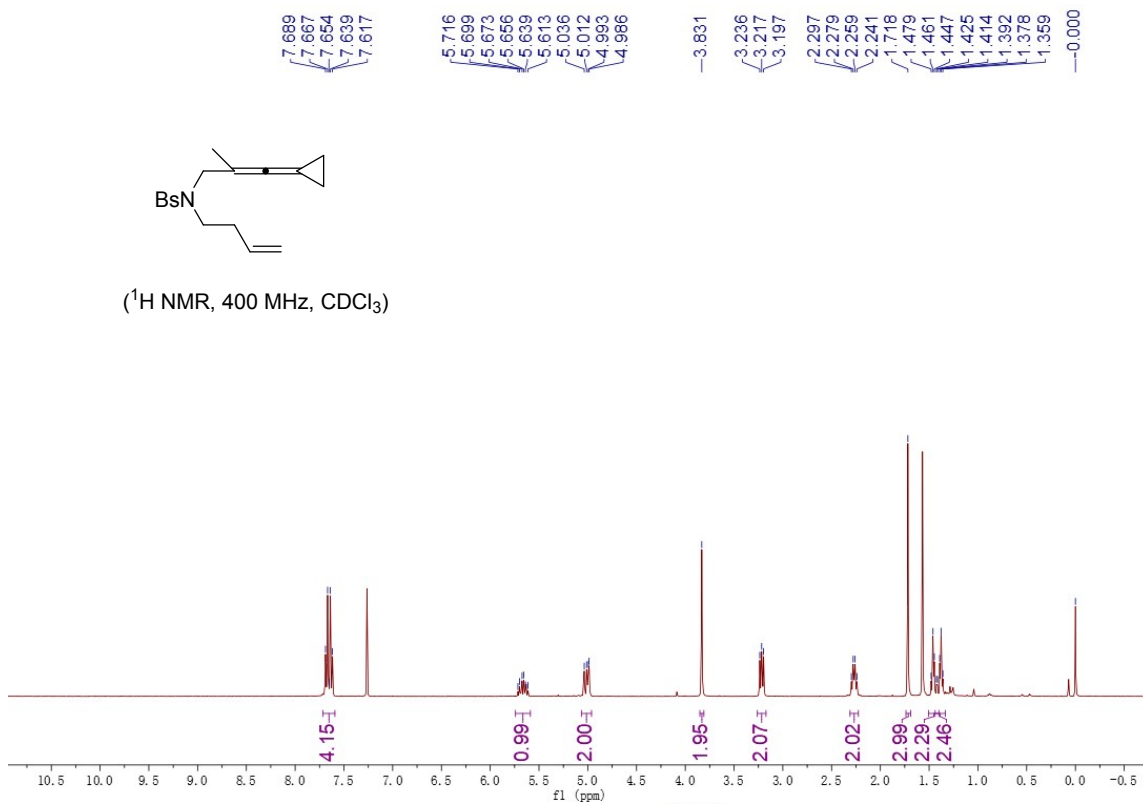

Chemical shift values (ppm): 188.755, 139.452, 134.748, 132.228, 128.646, 127.194, 117.038, 97.235, 77.862, 77.363 CDCl<sub>3</sub>, 77.045 CDCl<sub>3</sub>, 76.727 CDCl<sub>3</sub>, 52.415, 46.874, 32.567, 17.014, 7.058.

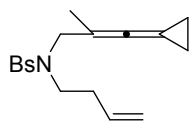

(<sup>13</sup>C NMR, 100 MHz, CDCl<sub>3</sub>)

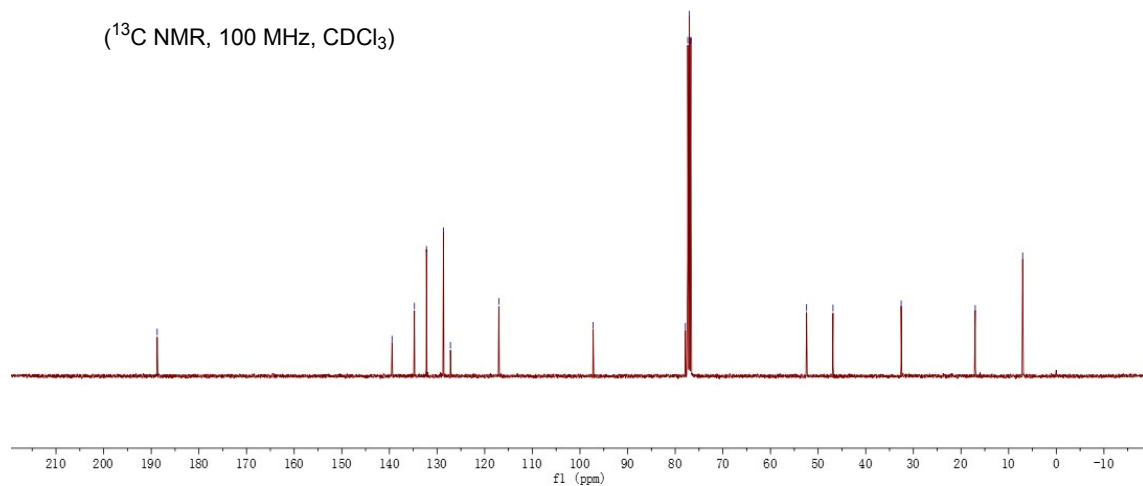

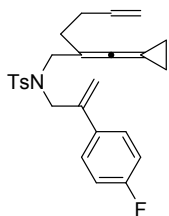

(<sup>1</sup>H NMR, 400 MHz, CDCl<sub>3</sub>)

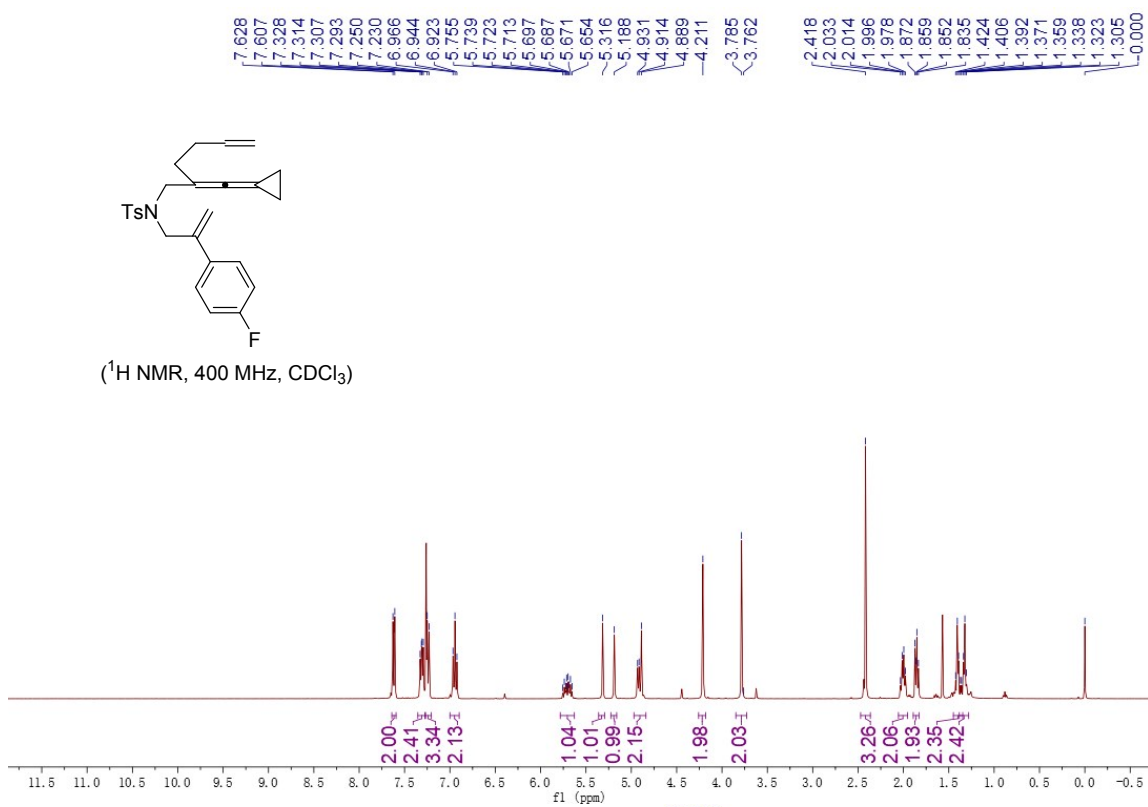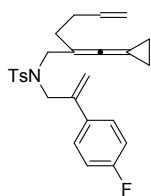

(<sup>13</sup>C NMR, 100 MHz, CDCl<sub>3</sub>)

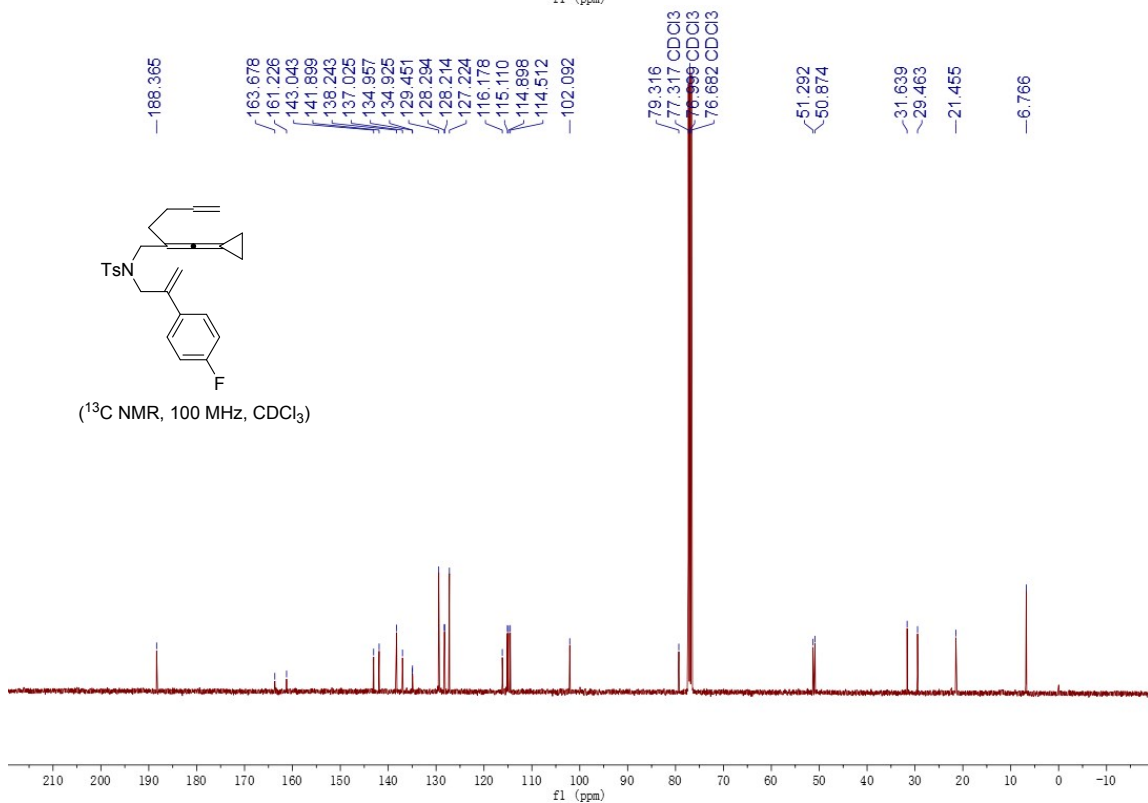

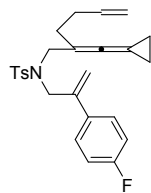

(<sup>19</sup>F NMR, 376 MHz, CDCl<sub>3</sub>)

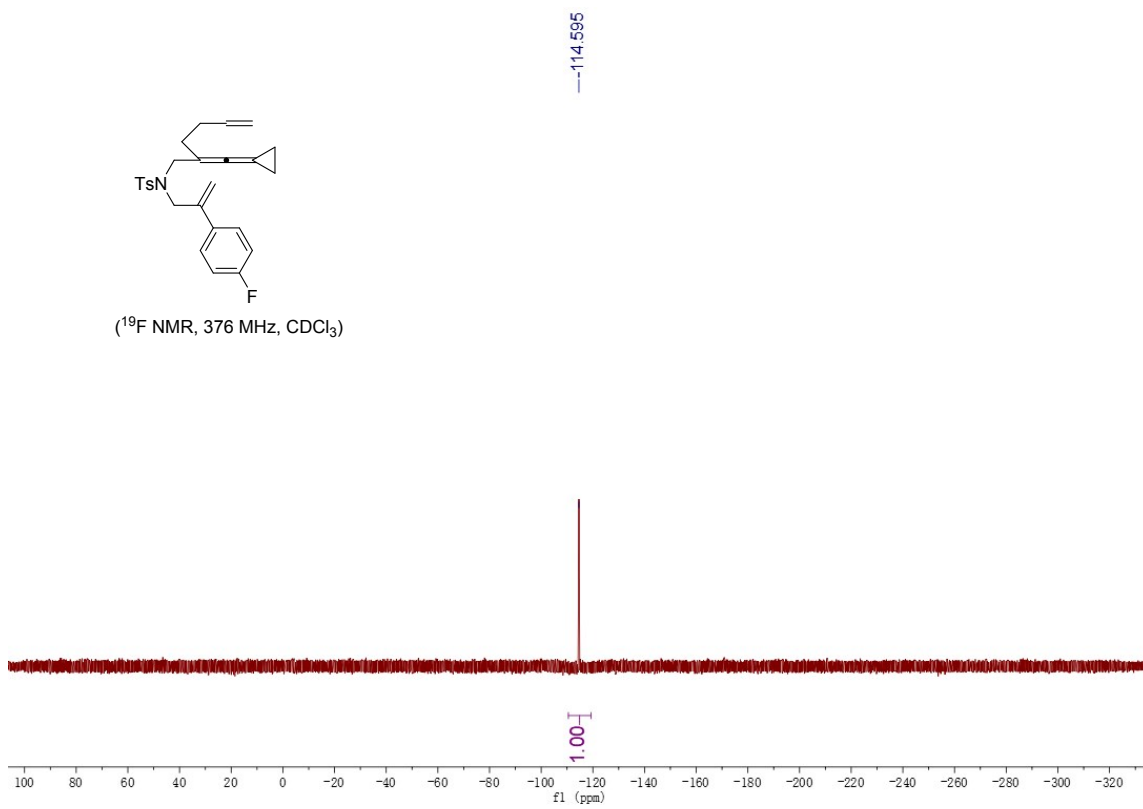

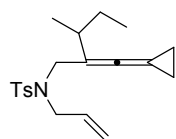

(<sup>1</sup>H NMR, 400 MHz, CDCl<sub>3</sub>)

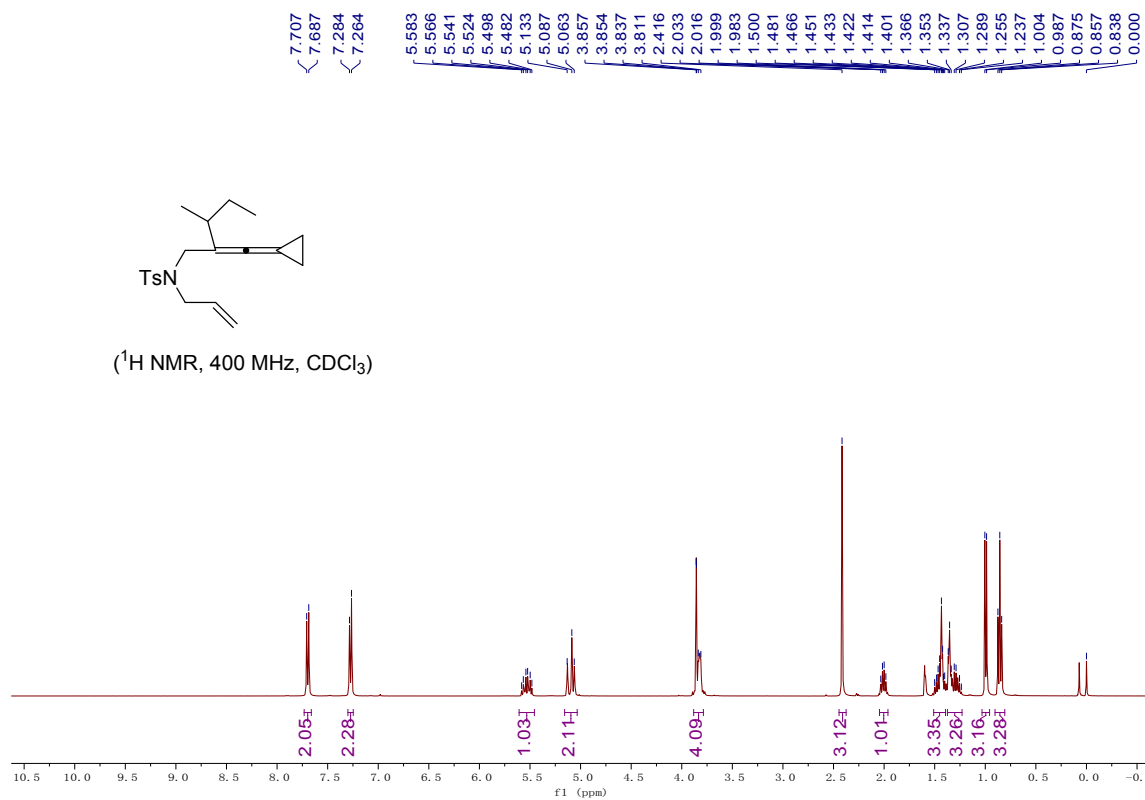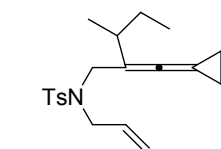

(<sup>13</sup>C NMR, 100 MHz, CDCl<sub>3</sub>)

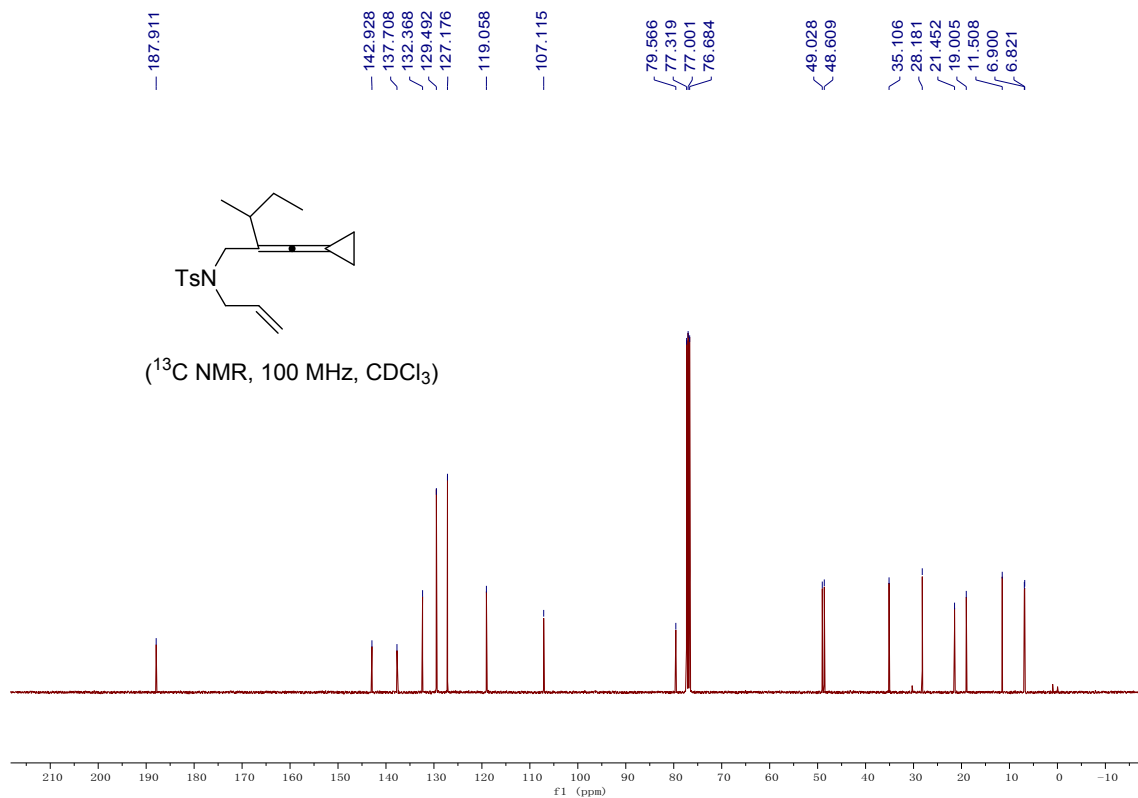

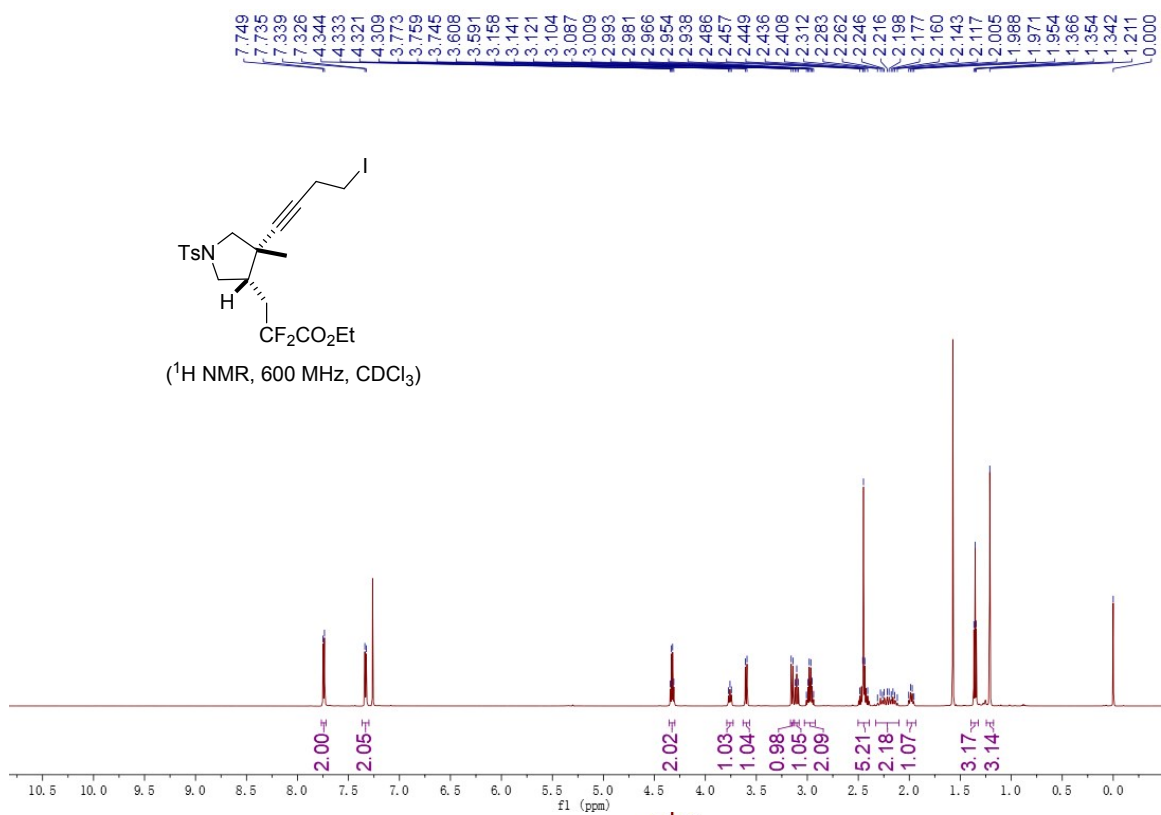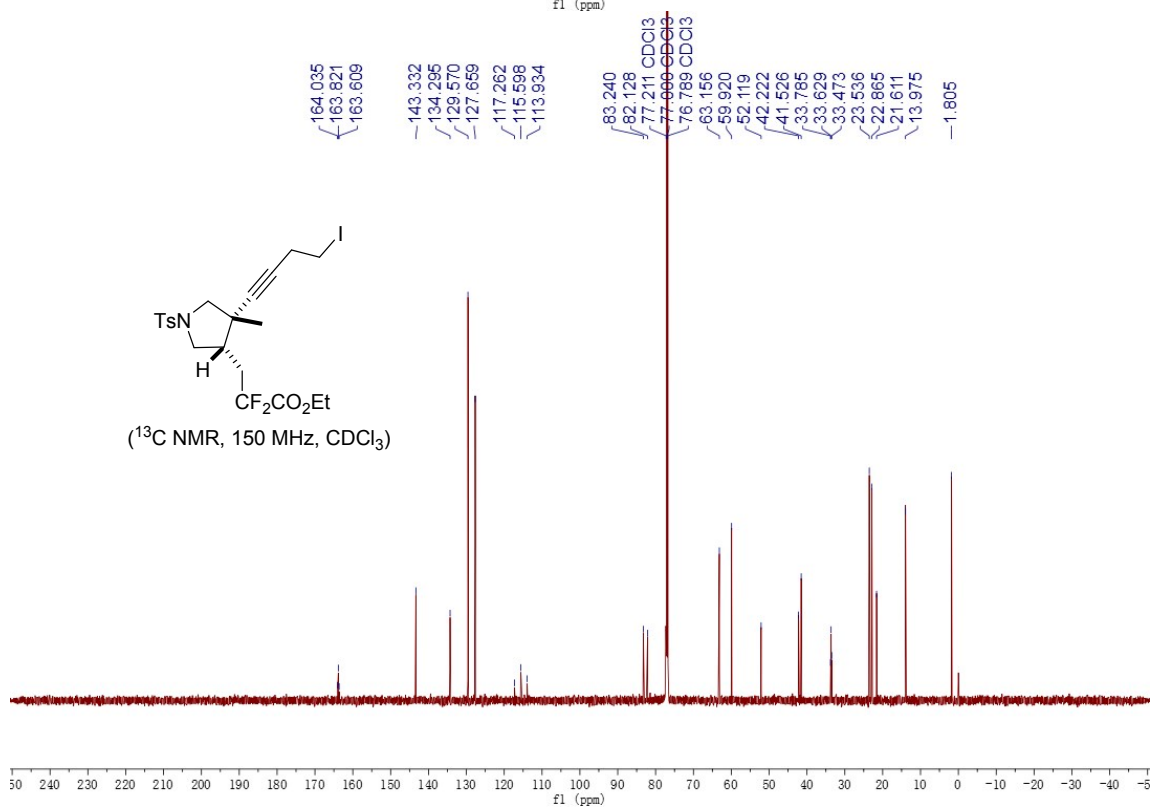

-103.255  
-103.273  
-103.298  
-103.316

-103.717  
-103.759  
-103.778  
-103.782

-105.779  
-105.804  
-105.822  
-105.847

-106.246  
-106.270  
-106.283  
-106.308

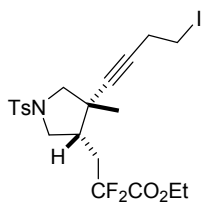

(<sup>19</sup>F NMR, 564 MHz, CDCl<sub>3</sub>)

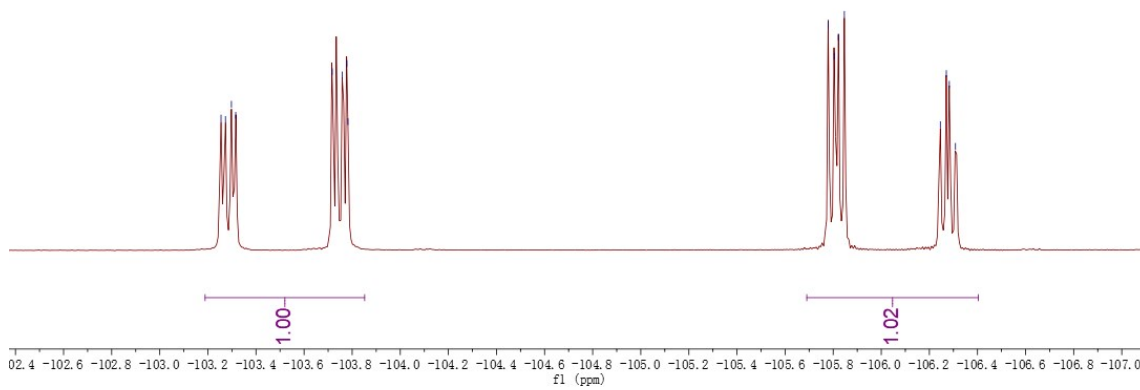

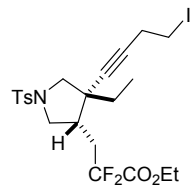

(<sup>1</sup>H NMR, 400 MHz, CDCl<sub>3</sub>)

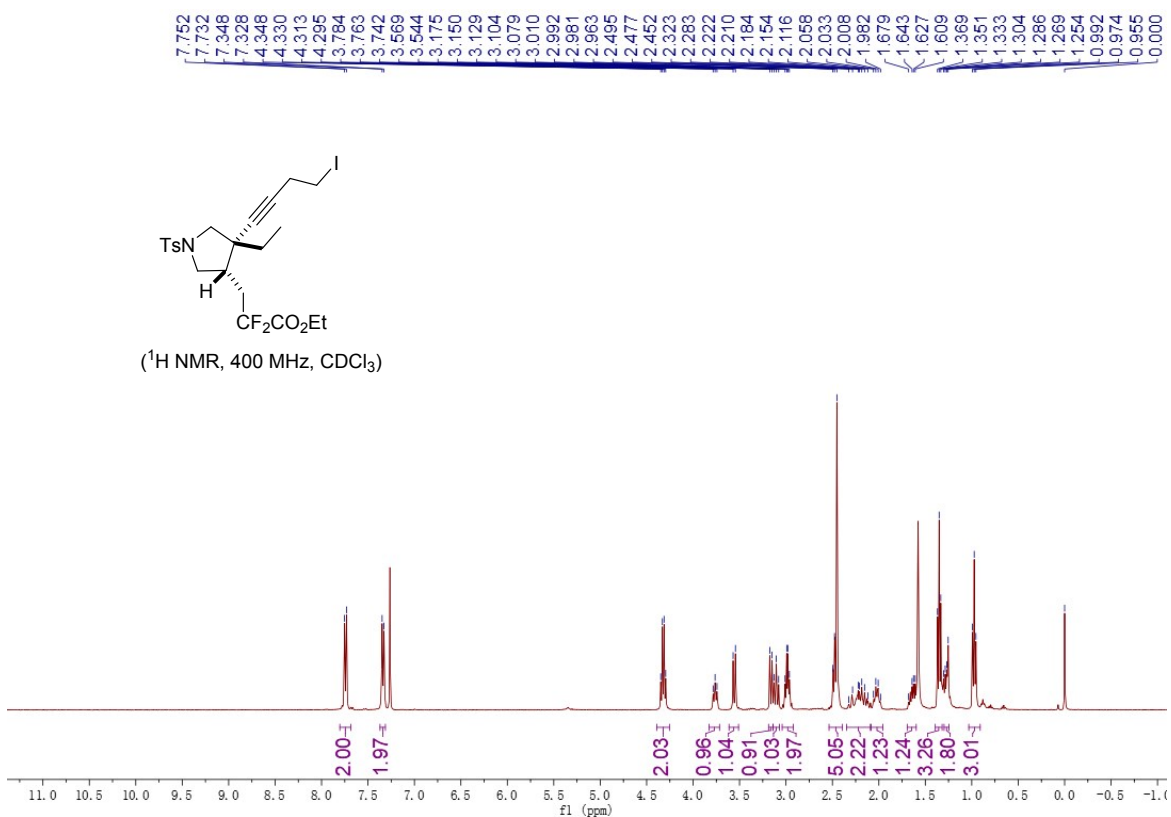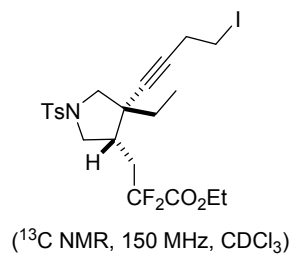

(<sup>13</sup>C NMR, 150 MHz, CDCl<sub>3</sub>)

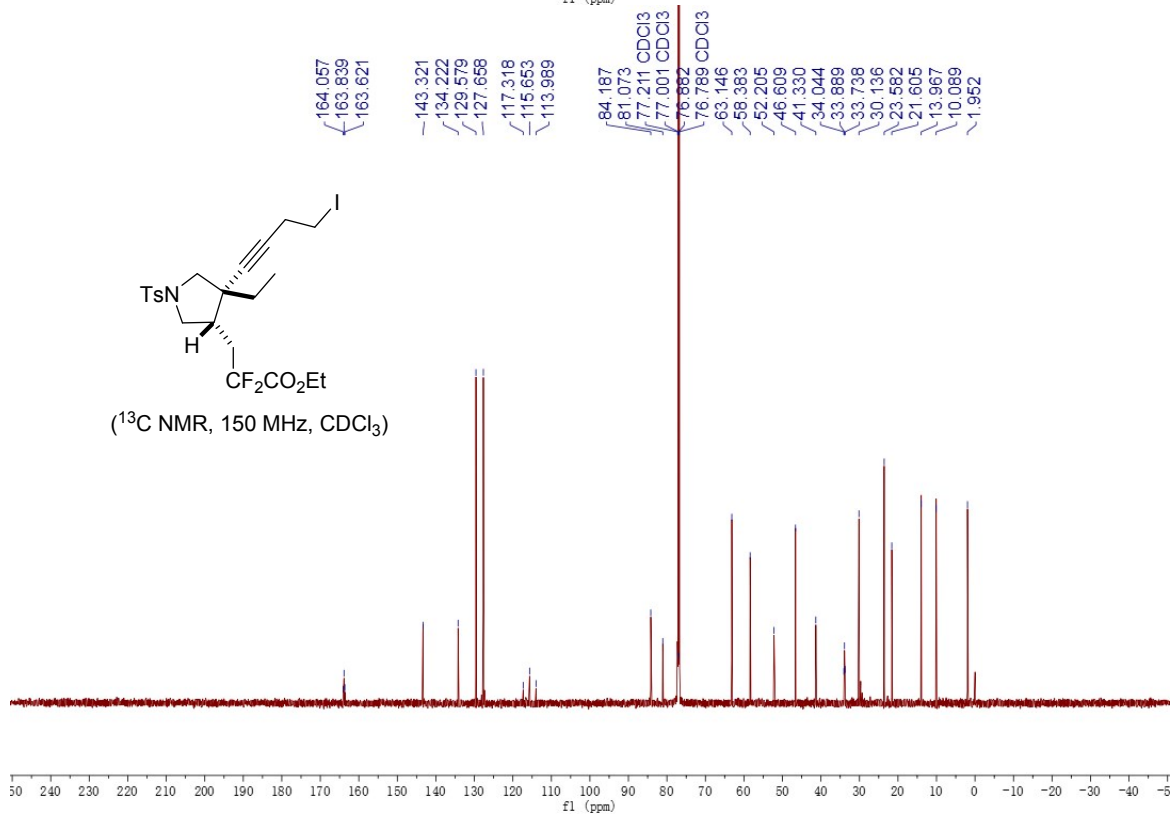

-102.986  
-103.004  
-103.030  
-103.049  
-103.450  
-103.468  
-103.494  
-103.512

-105.796  
-105.823  
-105.836  
-105.864  
-106.260  
-106.286  
-106.300  
-106.327

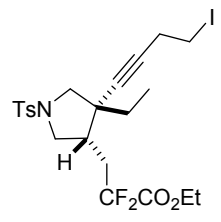

(<sup>19</sup>F NMR, 564 MHz, CDCl<sub>3</sub>)

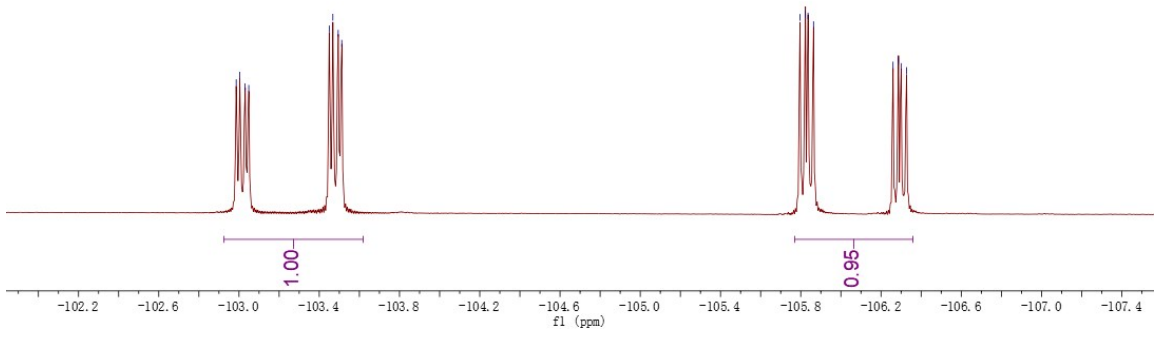



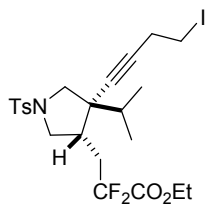

(<sup>1</sup>H NMR, 400 MHz, CDCl<sub>3</sub>)

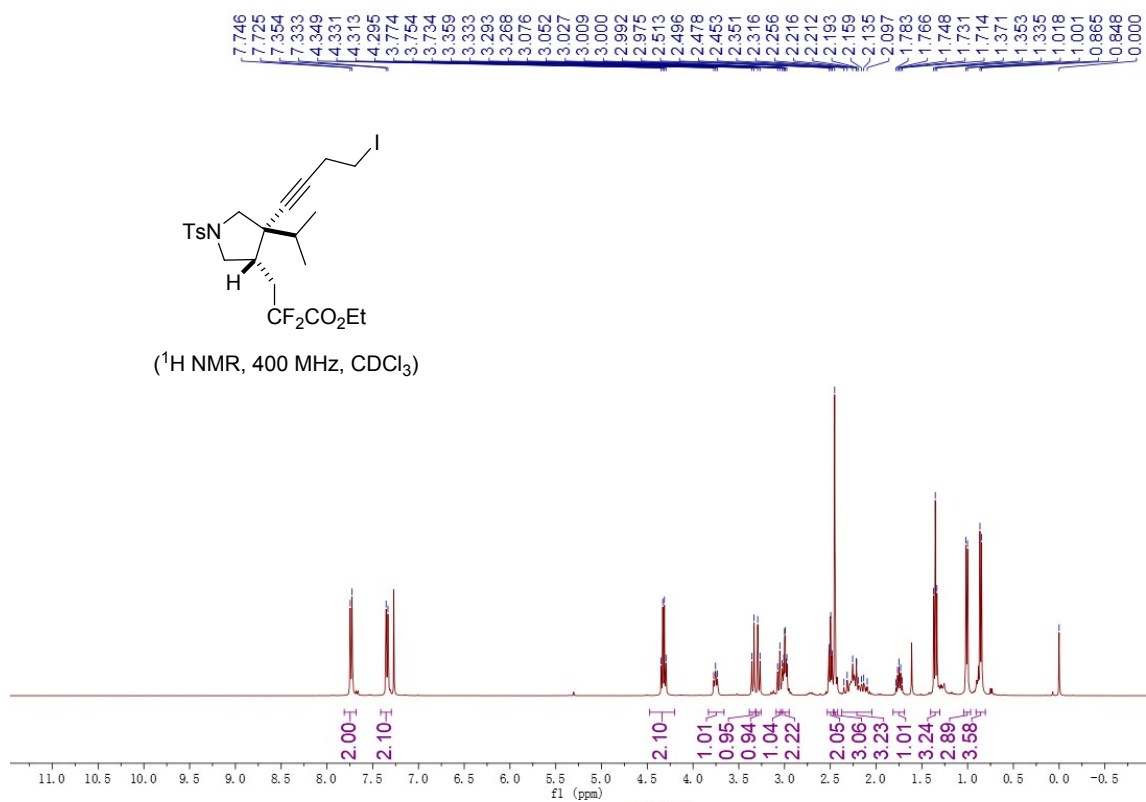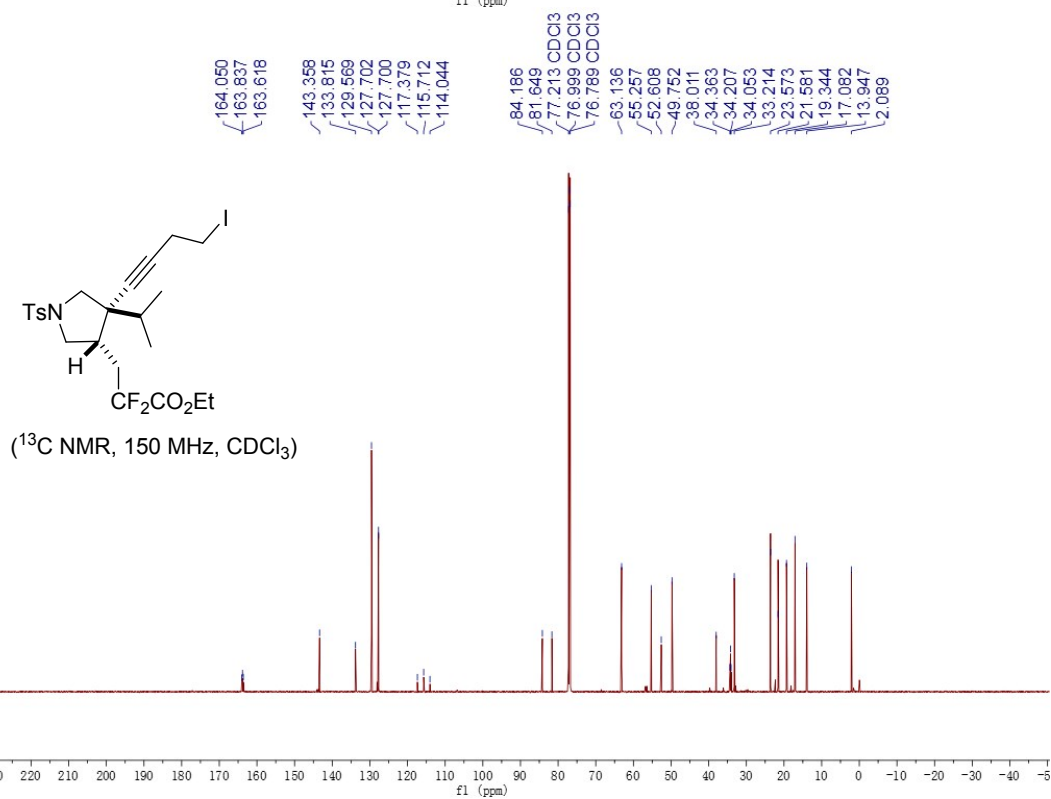

-102.711  
-102.728  
-102.752  
-102.770  
-103.174  
-103.189  
-103.216  
-103.234

-105.837  
-105.877  
-105.905  
-105.925  
-106.301  
-106.328  
-106.341  
-106.368

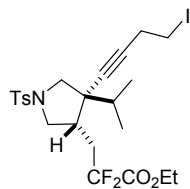

(<sup>19</sup>F NMR, 564 MHz, CDCl<sub>3</sub>)

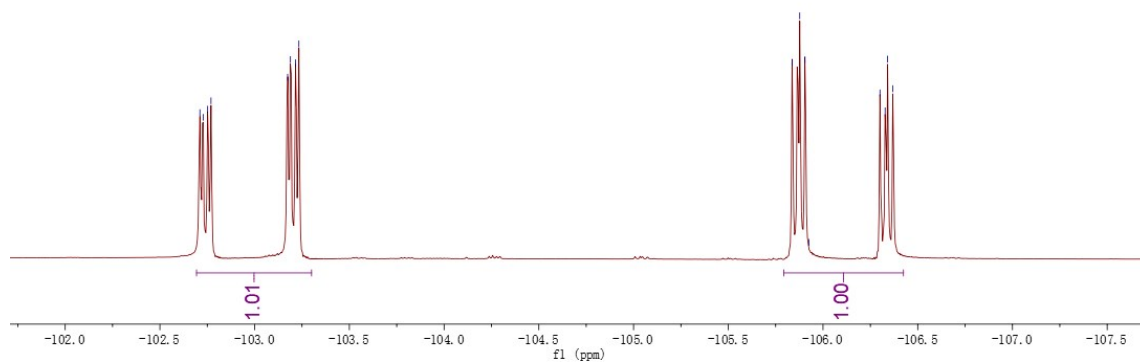

7.740  
7.720  
7.350  
7.330  
4.349  
4.332  
4.314  
4.296  
3.765  
3.744  
3.720  
3.385  
3.360  
3.293  
3.288  
3.082  
3.057  
3.043  
3.018  
3.000  
2.982  
2.955  
2.519  
2.501  
2.484  
2.451  
2.371  
2.327  
2.253  
2.272  
2.230  
2.198  
2.165  
2.113  
1.406  
1.372  
1.354  
1.336  
0.998  
0.962  
0.920  
0.897  
0.879  
0.861  
0.803  
0.786  
-0.000

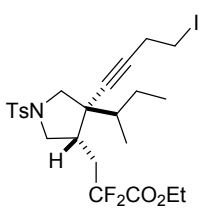

(<sup>1</sup>H NMR, 400 MHz, CDCl<sub>3</sub>)

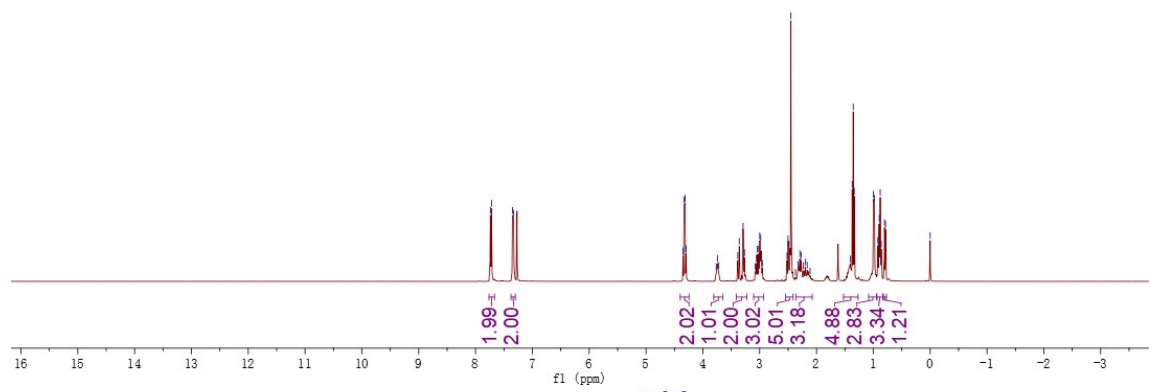

164.042  
163.829  
163.610  
143.359  
143.304  
133.936  
133.734  
129.561  
127.695  
117.381  
115.716  
114.052  
84.187  
83.875  
82.312  
81.916  
77.211 CDCl<sub>3</sub>  
77.000 CDCl<sub>3</sub>  
76.789 CDCl<sub>3</sub>  
63.131  
55.930  
54.294  
52.553  
50.147  
49.899  
40.220  
39.237  
37.587  
37.450  
34.437  
25.916  
23.784  
23.572  
23.545  
21.577  
15.319  
13.930  
12.624  
12.247  
12.221  
2.100  
0.000

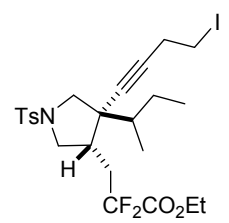

(<sup>13</sup>C NMR, 150 MHz, CDCl<sub>3</sub>)

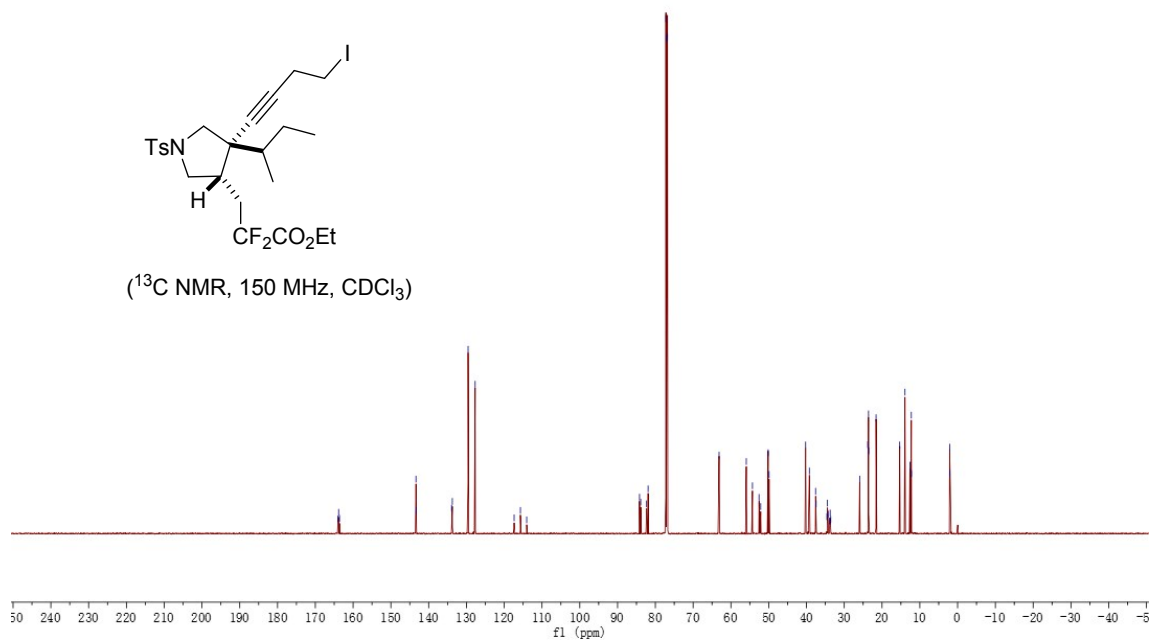

-102.663  
-102.674  
-102.689  
-102.702  
-102.716  
-102.732  
-103.137  
-103.153  
-103.167  
-103.179  
-103.193

-105.738  
-105.766  
-105.778  
-105.806  
-105.823  
-105.863  
-105.891  
-105.900  
-106.202  
-106.229  
-106.242  
-106.269  
-106.287  
-106.314  
-106.327  
-106.355

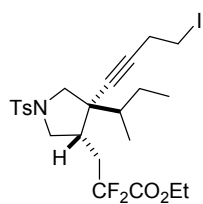

(<sup>19</sup>F NMR, 564 MHz, CDCl<sub>3</sub>)

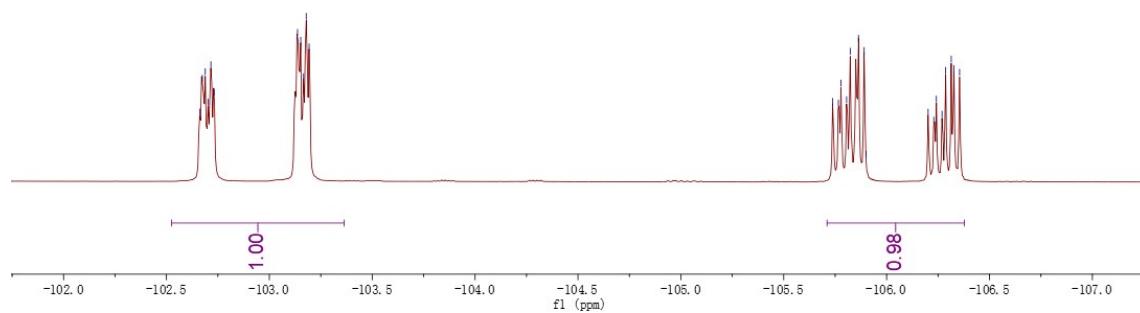

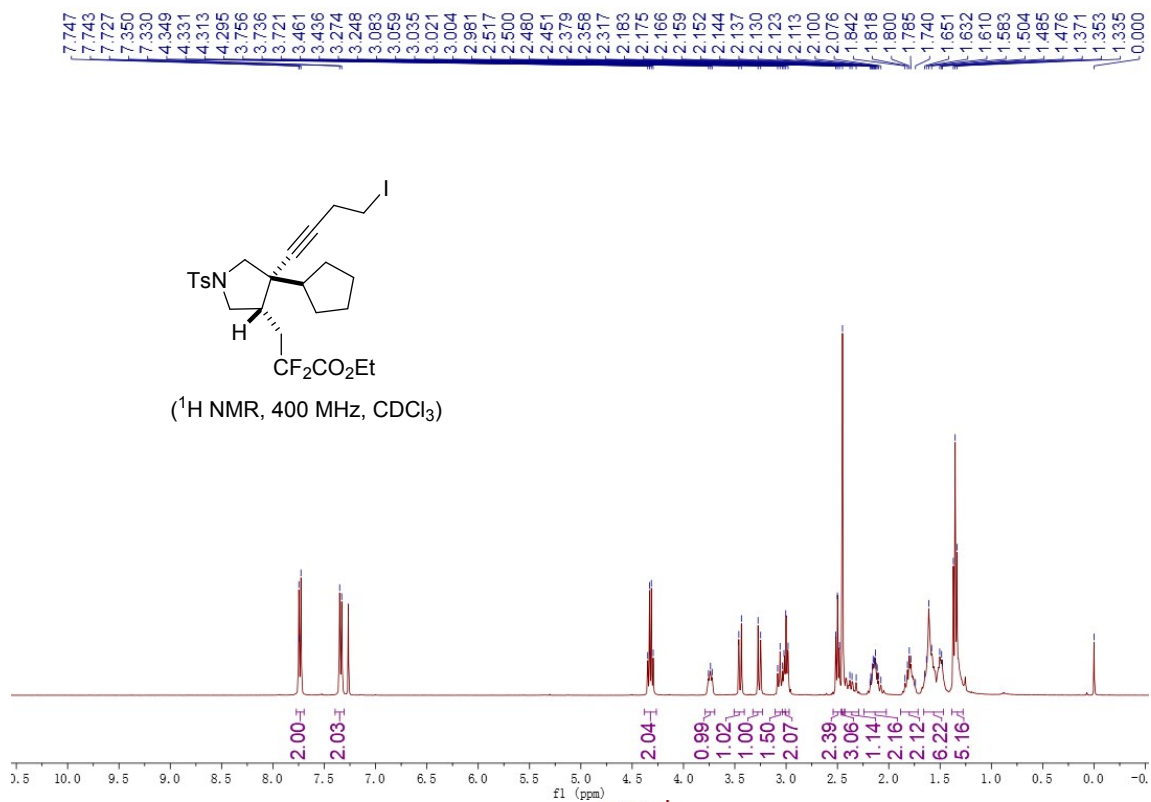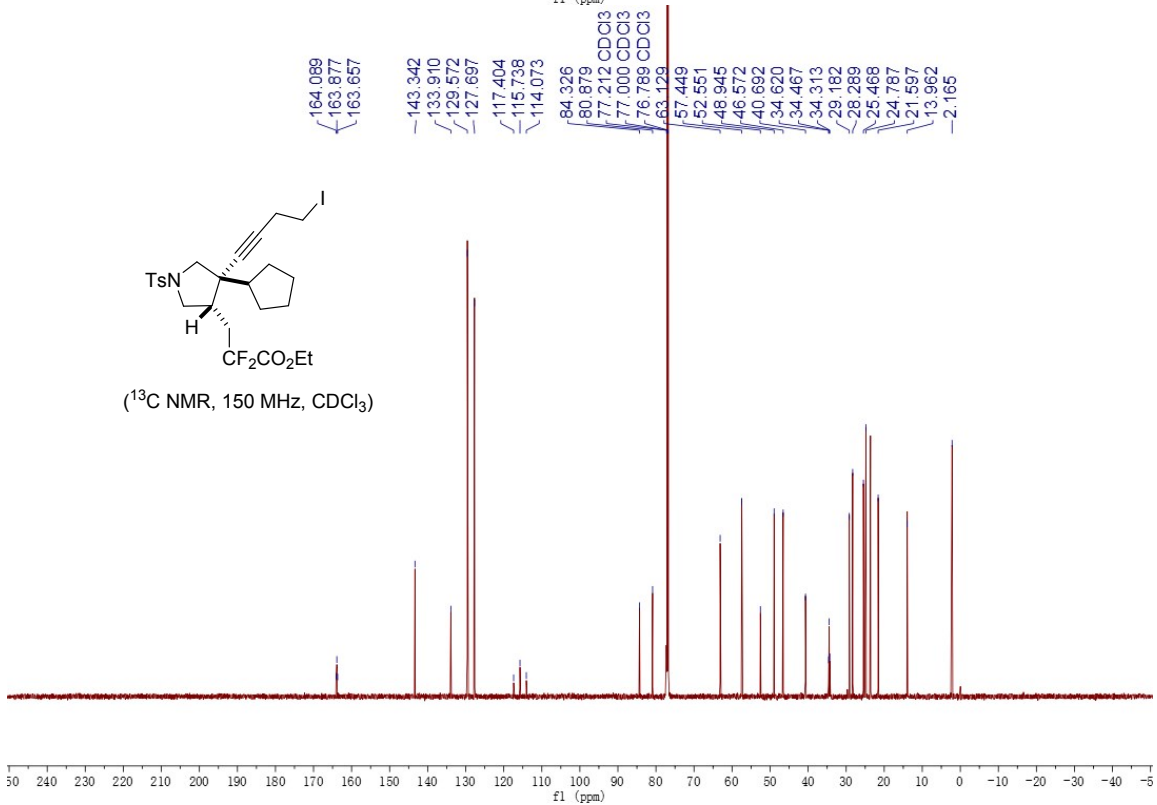

-102.653  
-102.666  
-102.697  
-102.711  
-103.112  
-103.130  
-103.158  
-103.173

-105.963  
-106.000  
-106.001  
-106.031  
-106.427  
-106.465  
-106.466  
-106.494

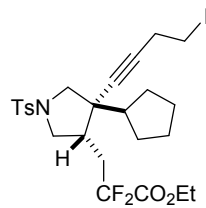

(<sup>19</sup>F NMR, 564 MHz, CDCl<sub>3</sub>)

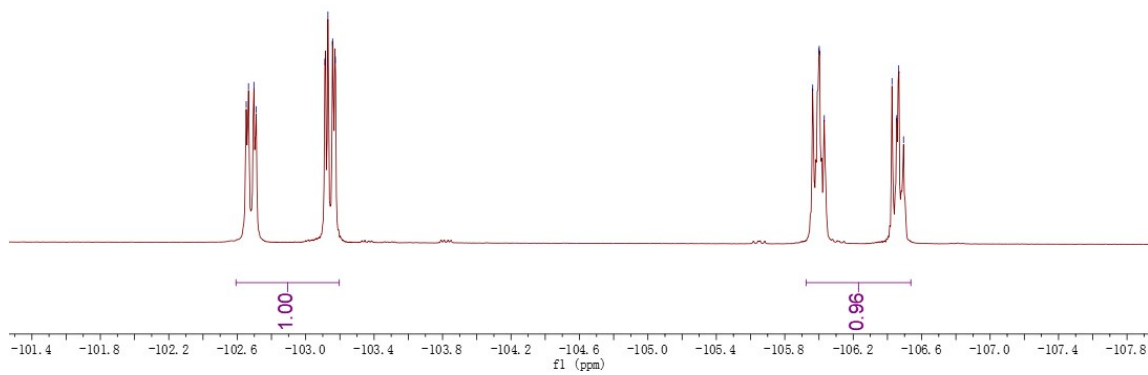

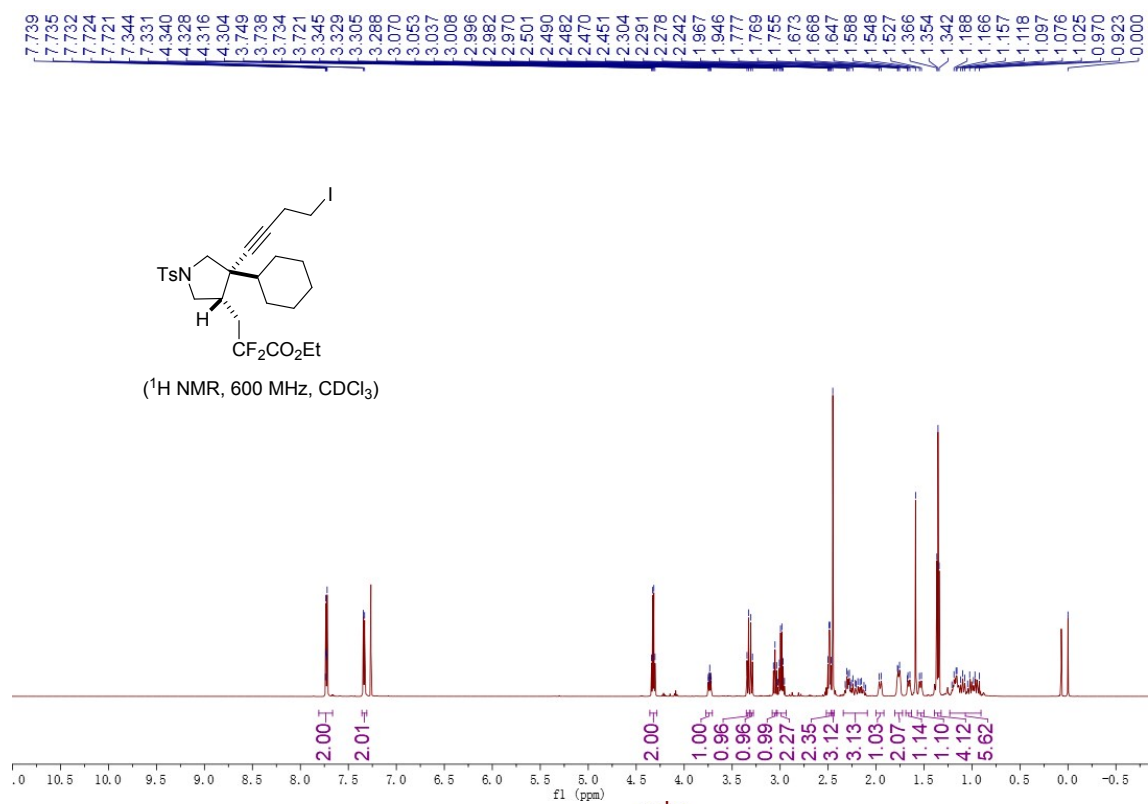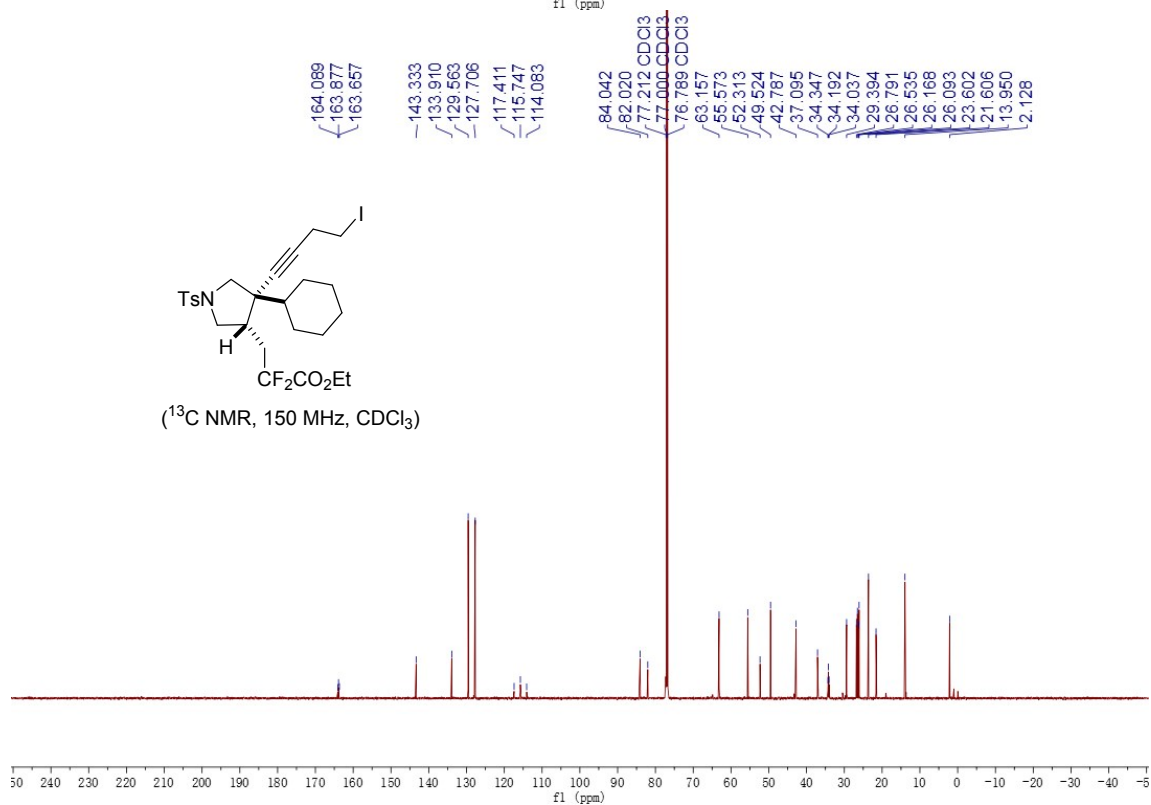

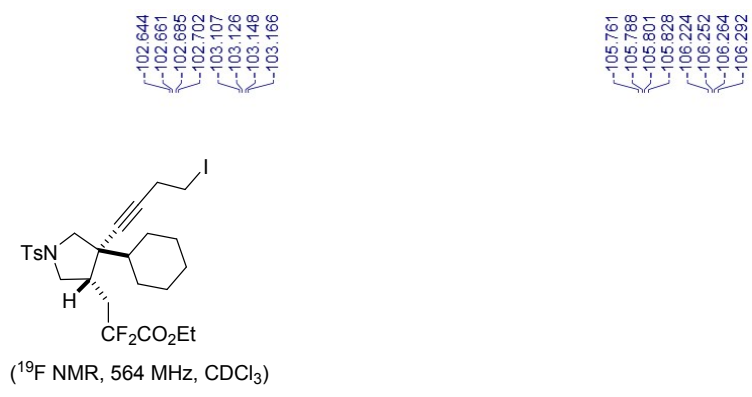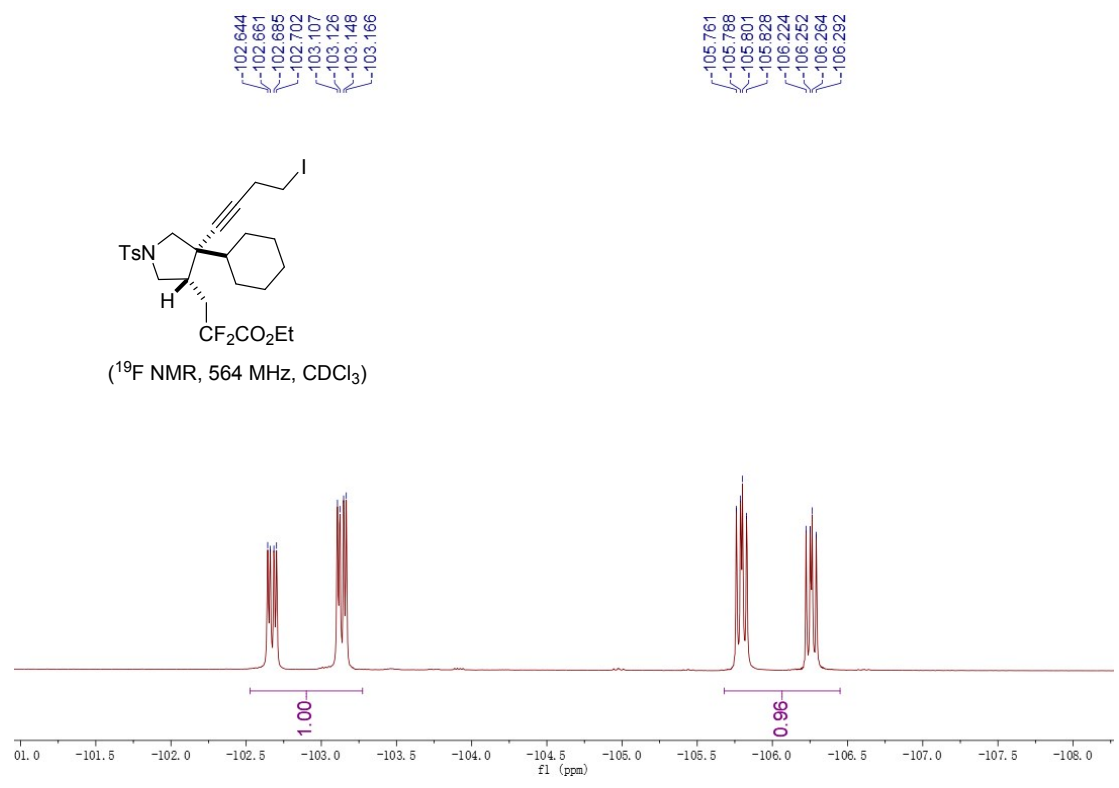



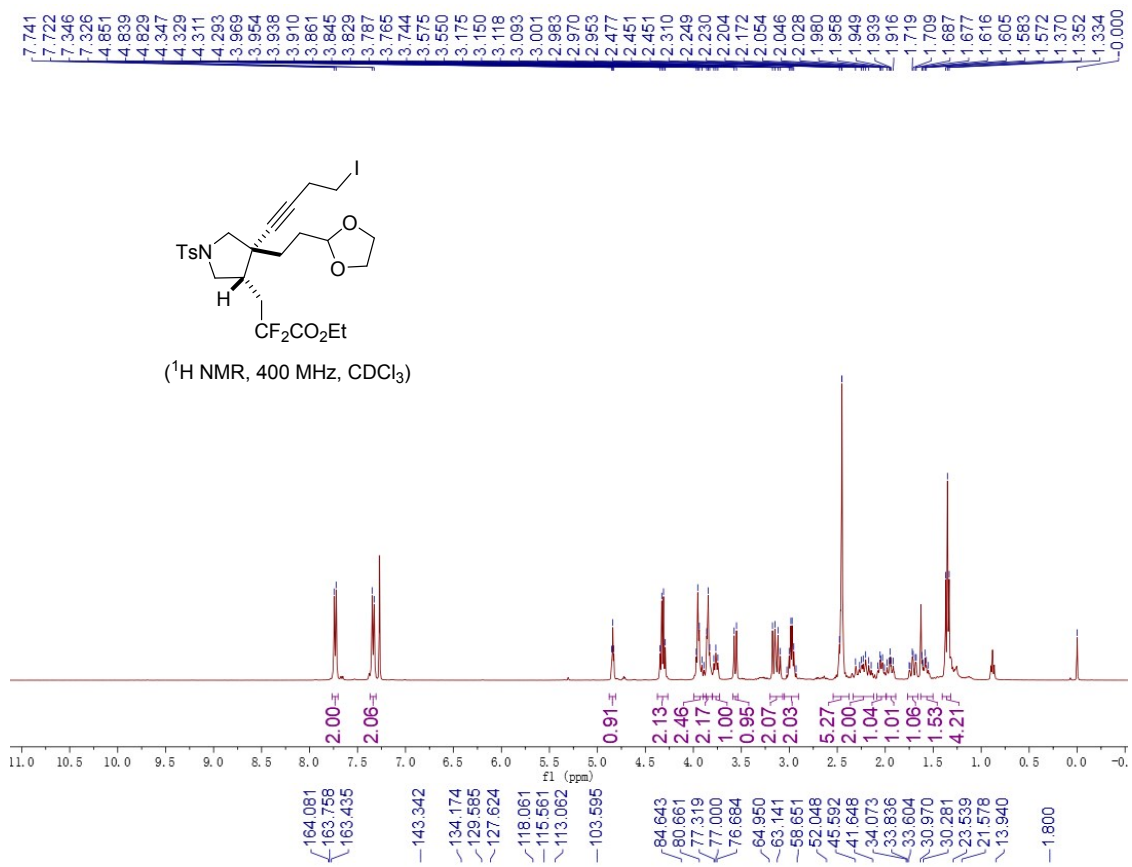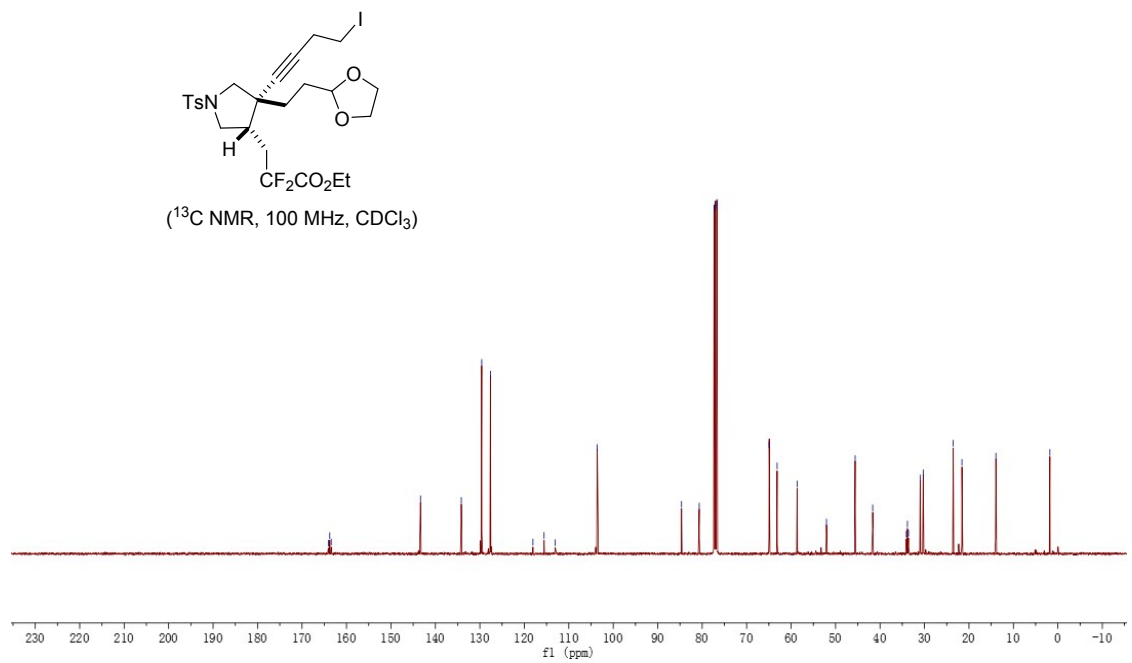

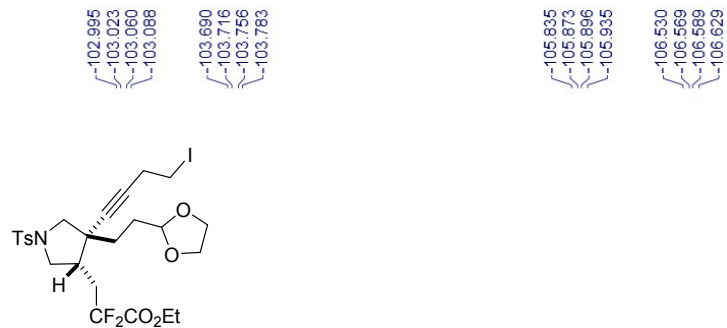

( $^{19}\text{F}$  NMR, 376 MHz,  $\text{CDCl}_3$ )

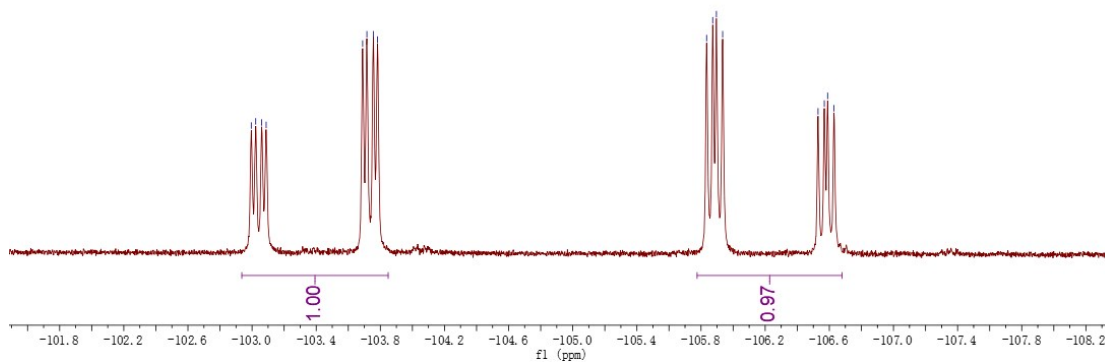

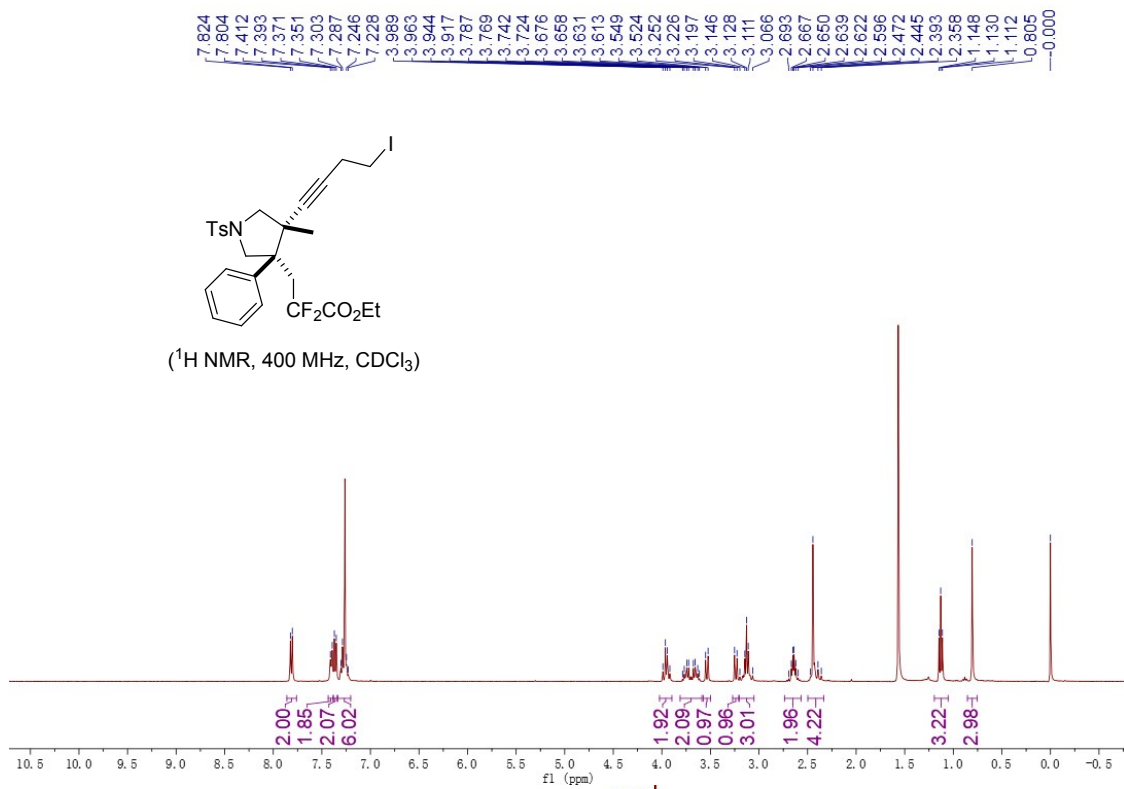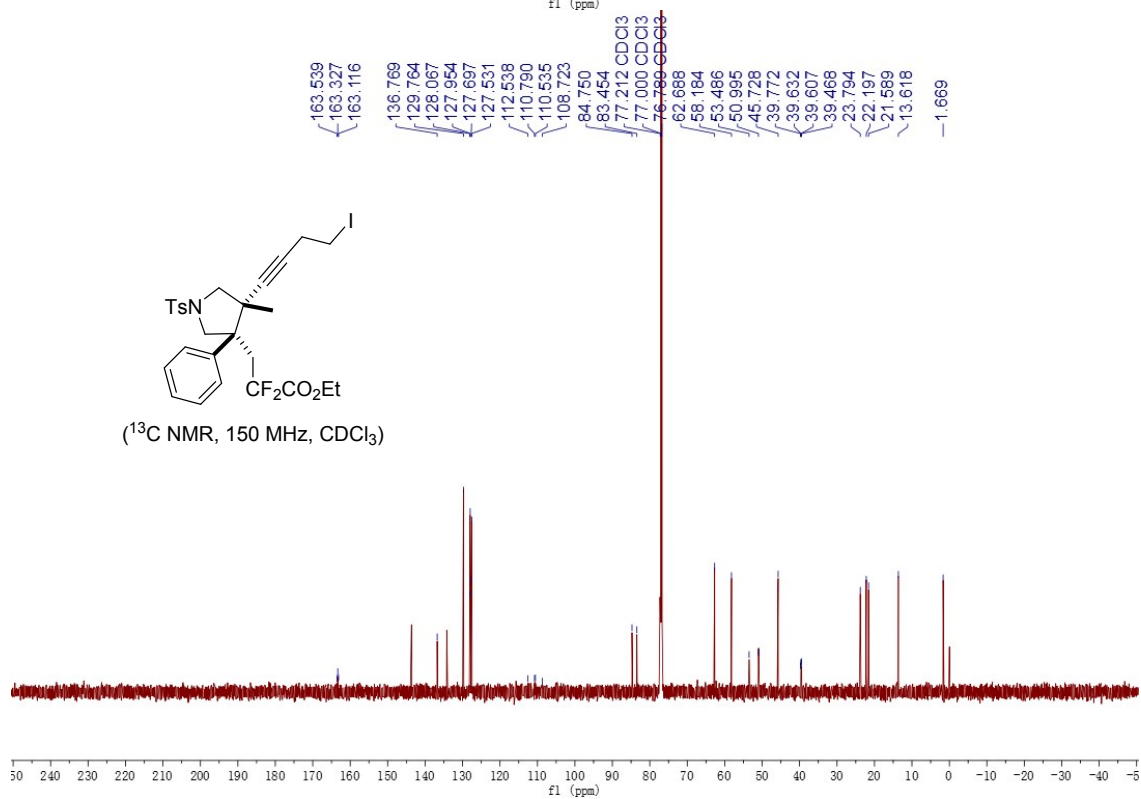

-92.817  
-92.839  
-92.861  
-93.285  
-93.308  
-93.330

-105.202  
-105.225  
-105.250  
-105.271  
-105.670  
-105.693  
-105.719  
-105.742

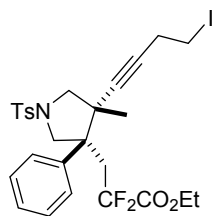

(<sup>19</sup>F NMR, 564 MHz, CDCl<sub>3</sub>)

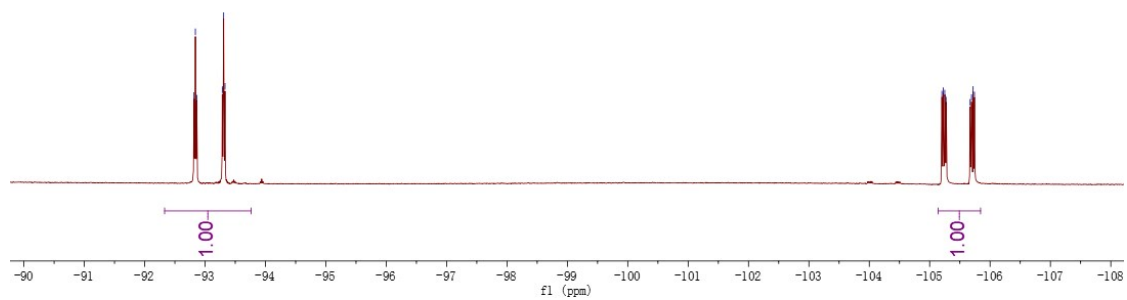

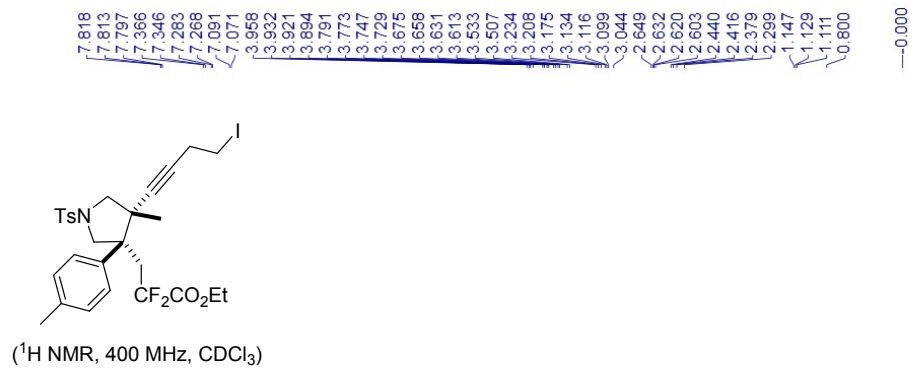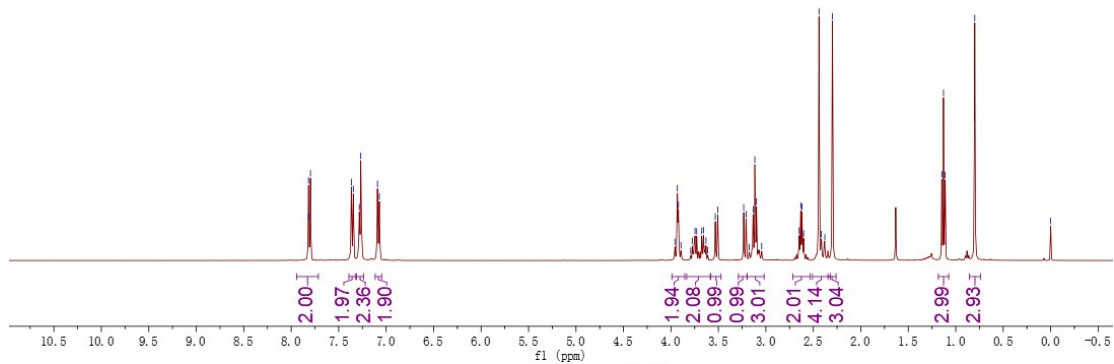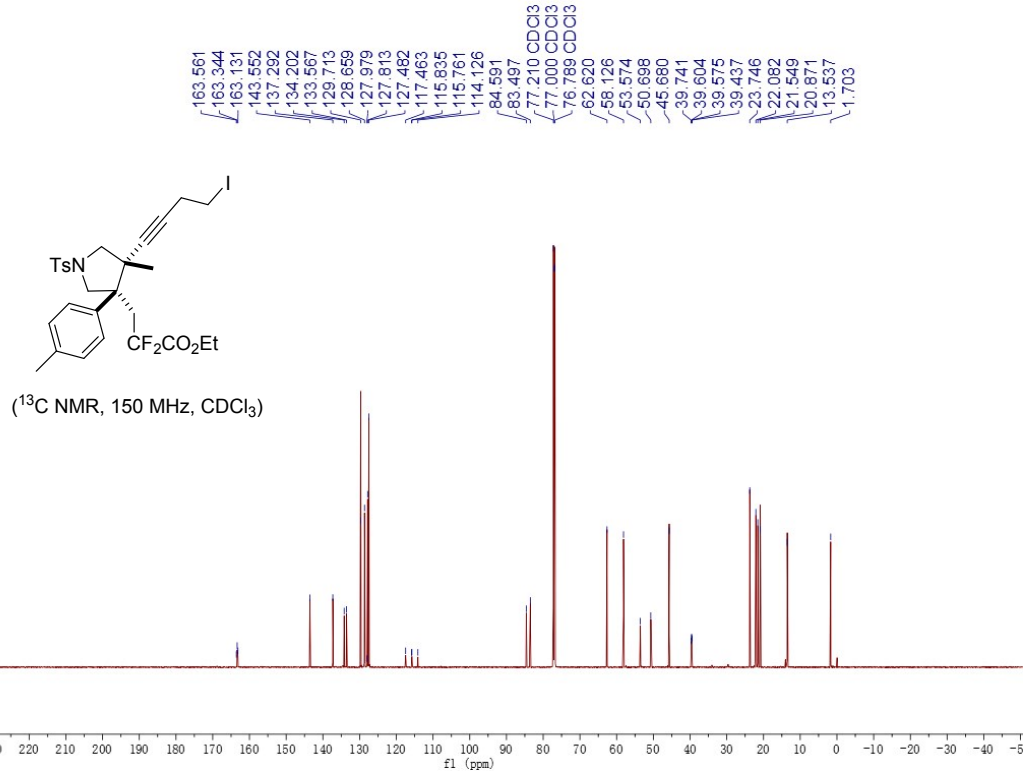

-92.799  
-92.821  
-92.841  
-93.267  
-93.289  
-93.309

-105.279  
-105.301  
-105.328  
-105.350  
-105.747  
-105.770  
-105.796  
-105.819

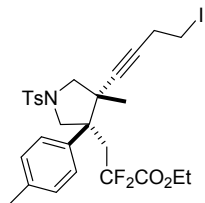

(<sup>19</sup>F NMR, 564 MHz, CDCl<sub>3</sub>)

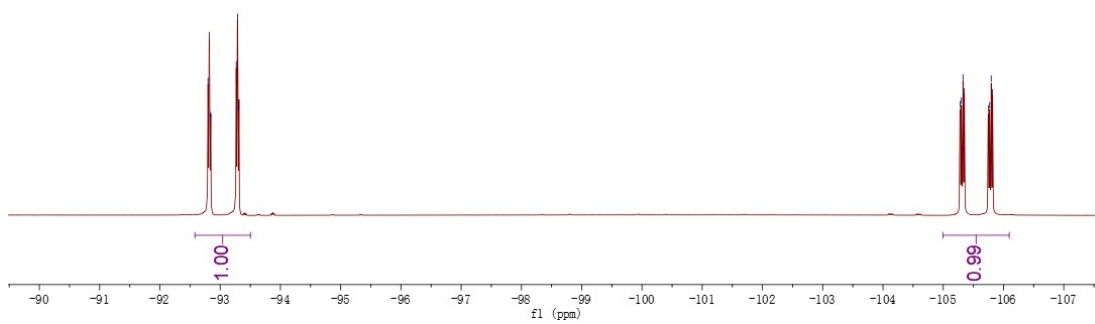

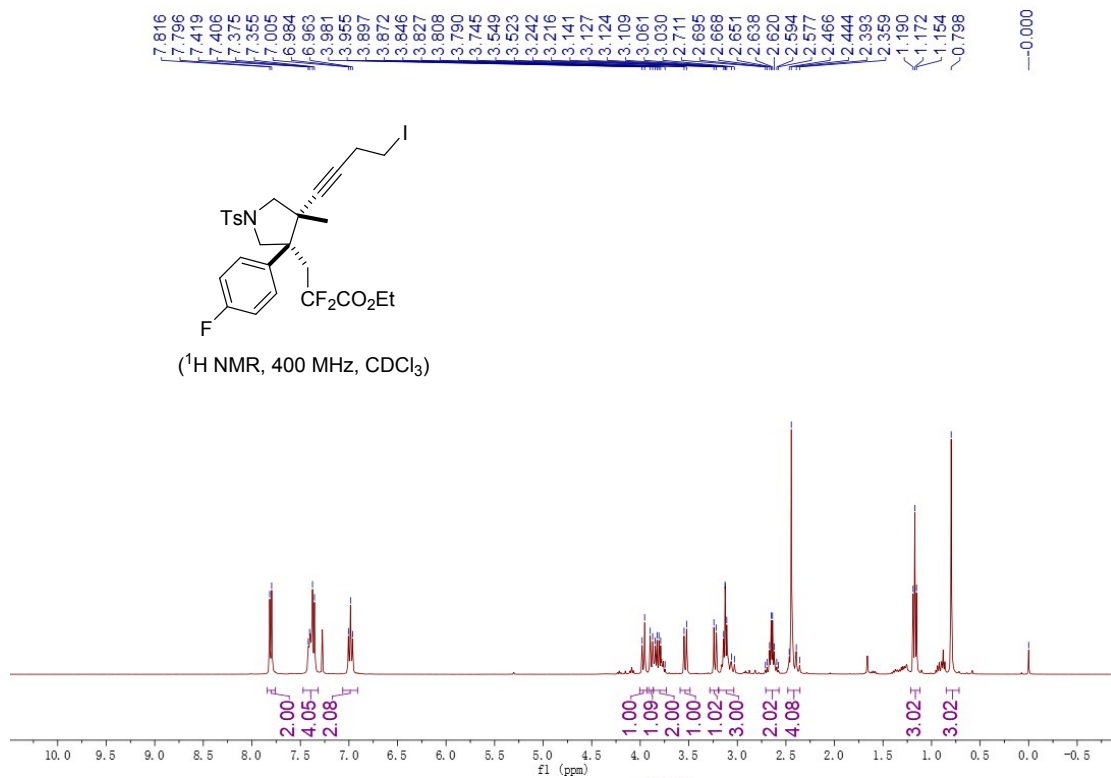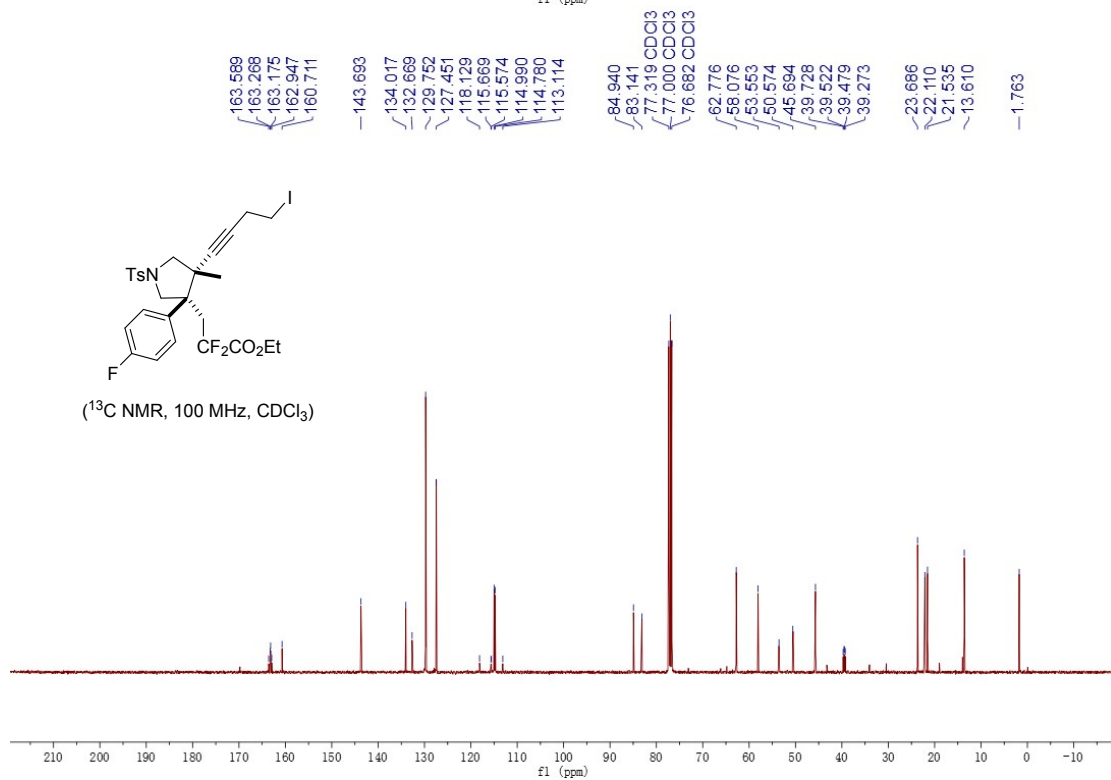

-93.710  
-93.744  
-93.778  
-94.416  
-94.449  
-94.484

-104.827  
-104.864  
-104.893  
-104.929  
-105.532  
-105.569  
-105.597  
-105.634

-114.130  
-114.145  
-114.148  
-114.152  
-114.166  
-114.177  
-114.187  
-114.202

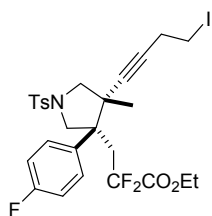

(<sup>19</sup>F NMR, 376 MHz, CDCl<sub>3</sub>)

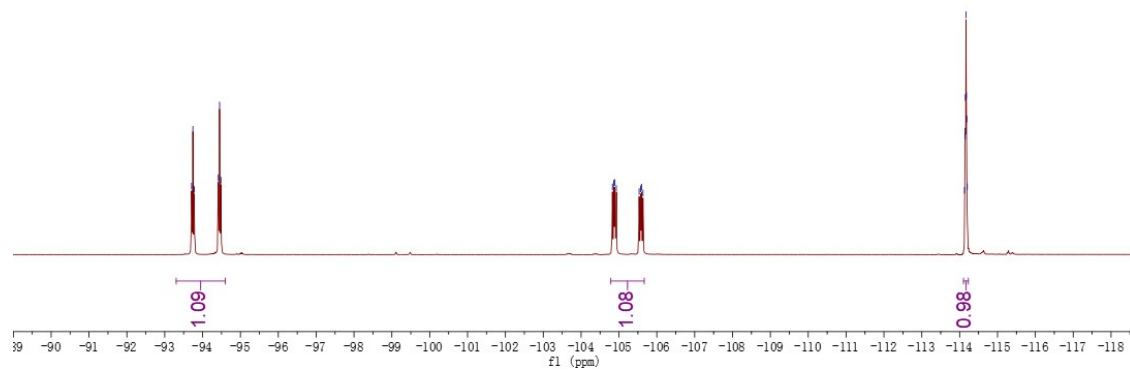



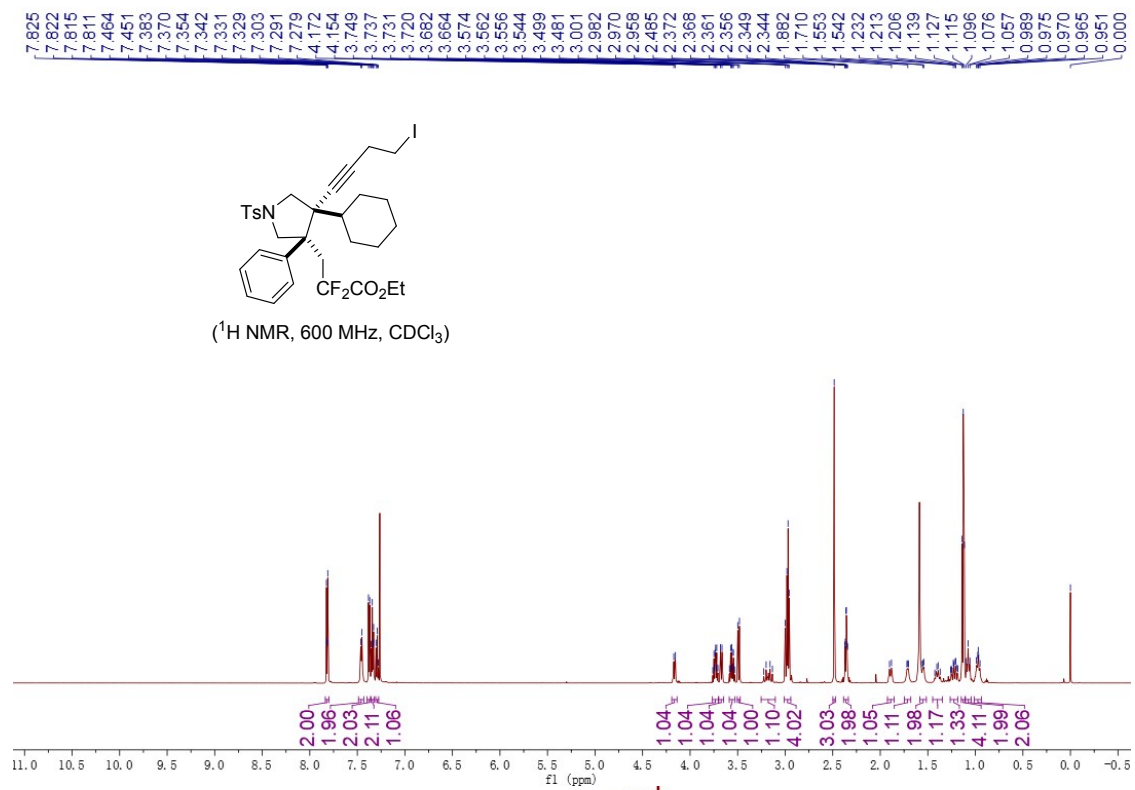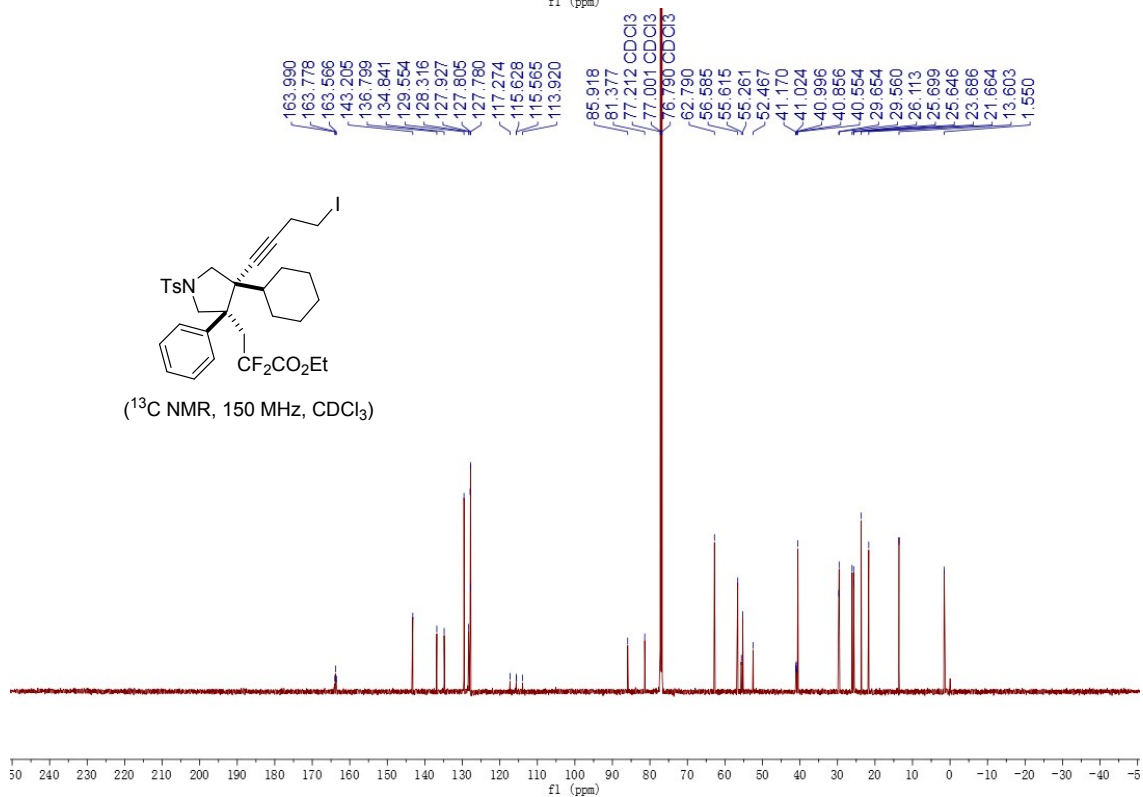

-94.276  
-94.297  
-94.318  
-94.730  
-94.749  
-94.772

-103.033  
-103.061  
-103.076  
-103.106  
-103.487  
-103.514  
-103.531  
-103.559

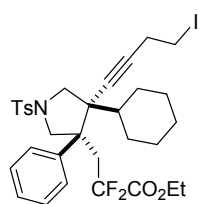

(<sup>19</sup>F NMR, 564 MHz, CDCl<sub>3</sub>)

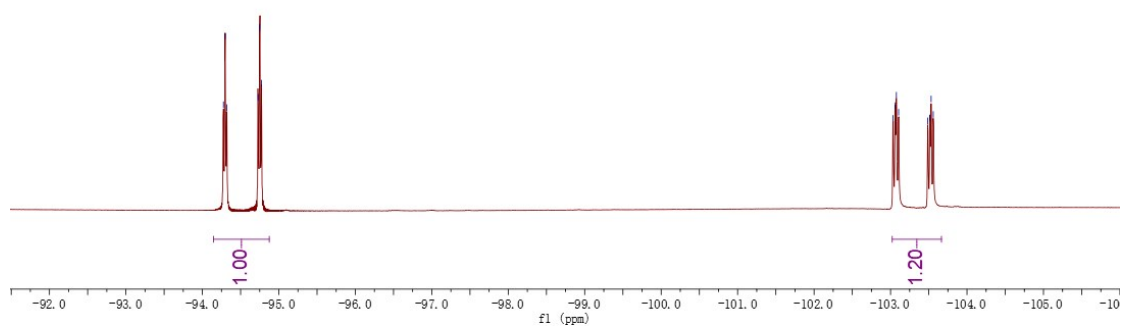

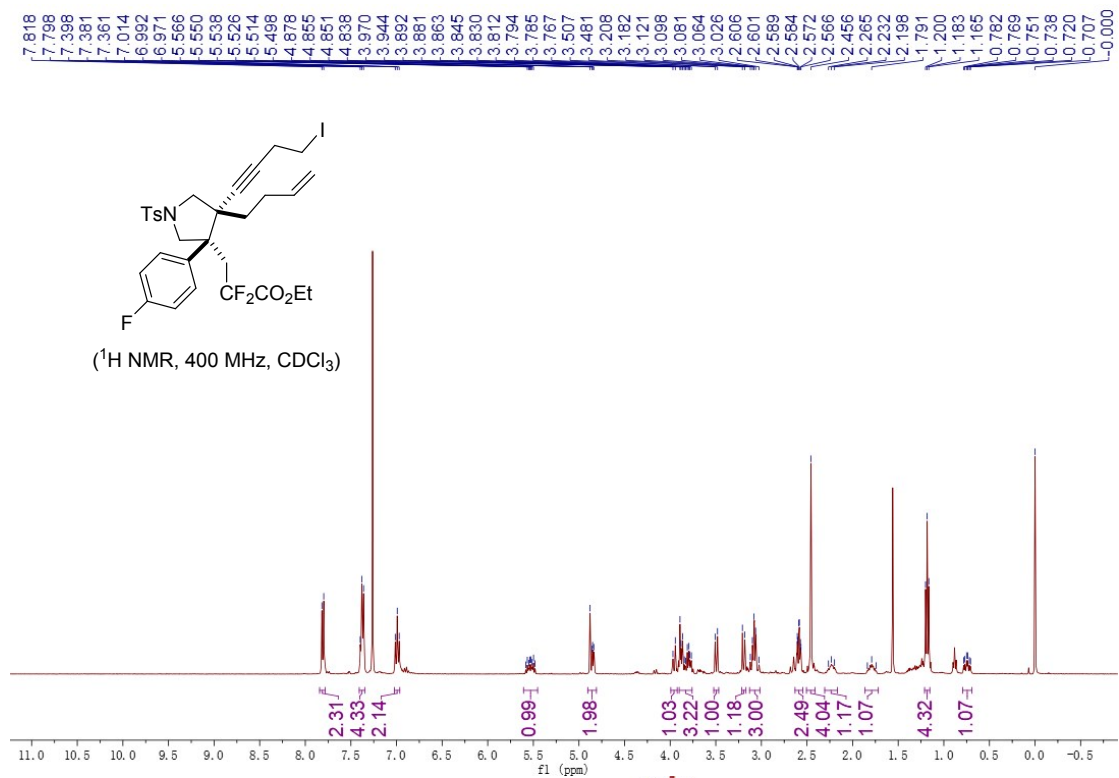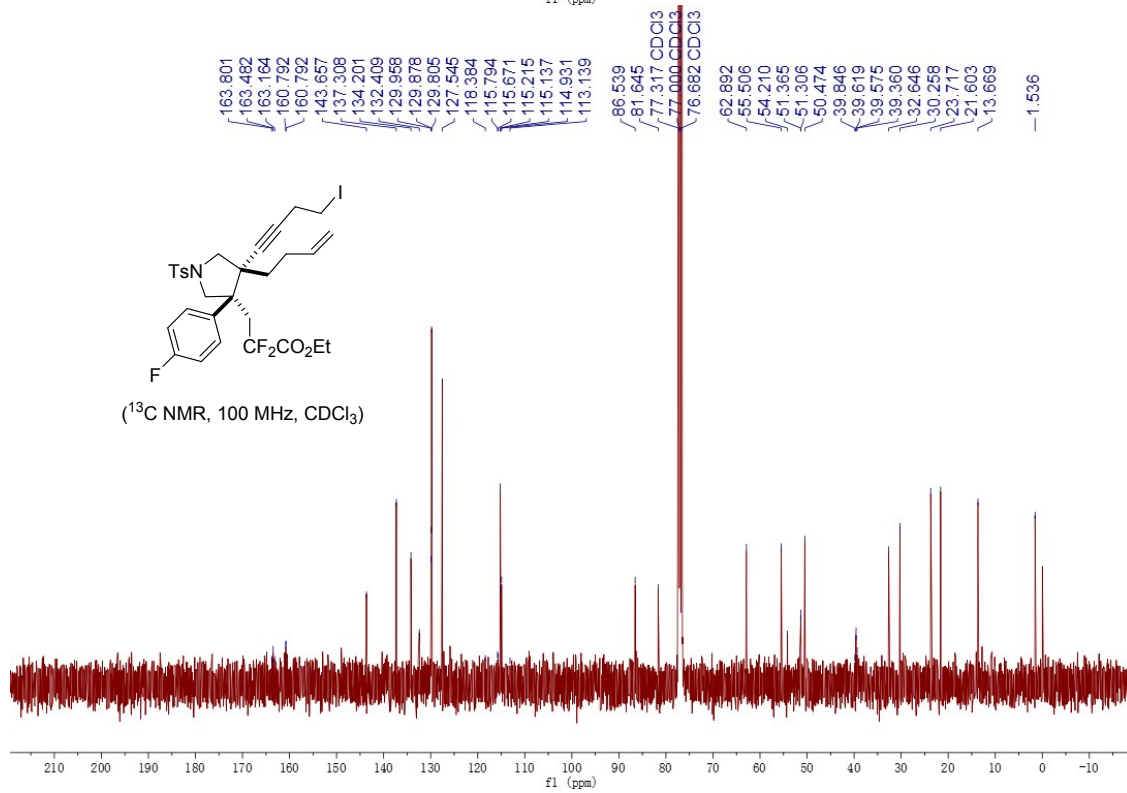

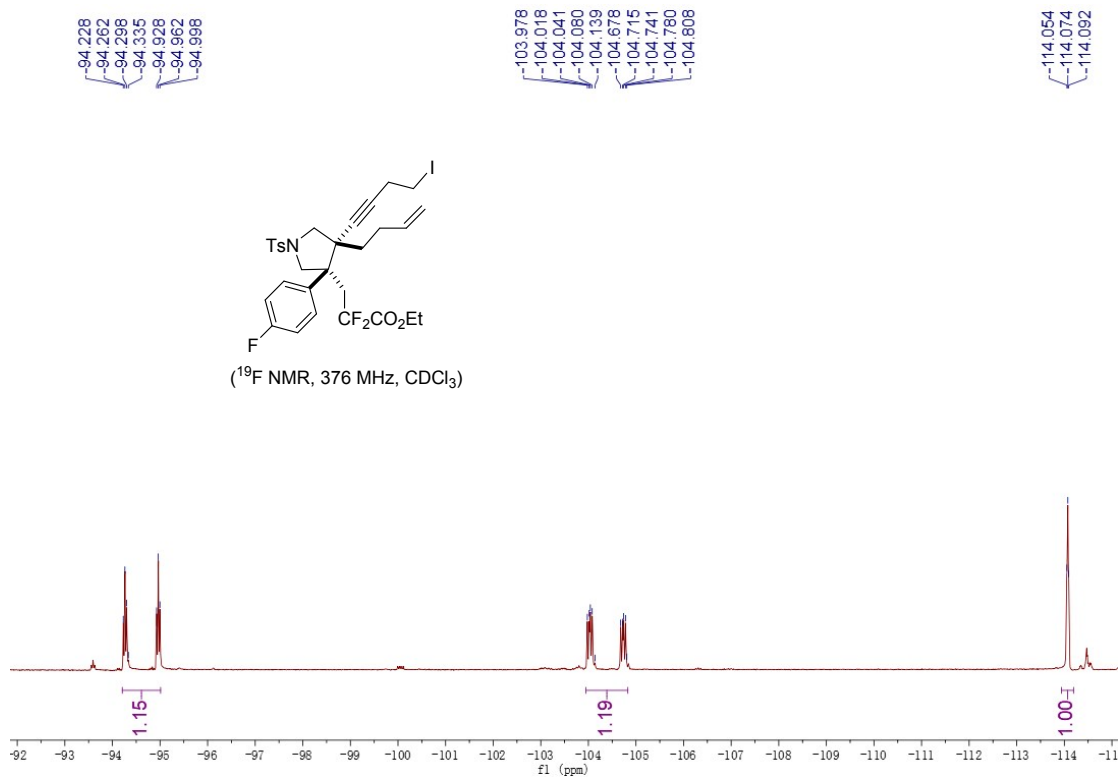

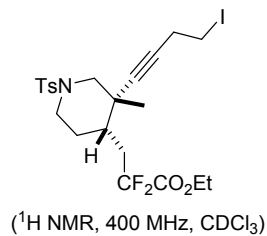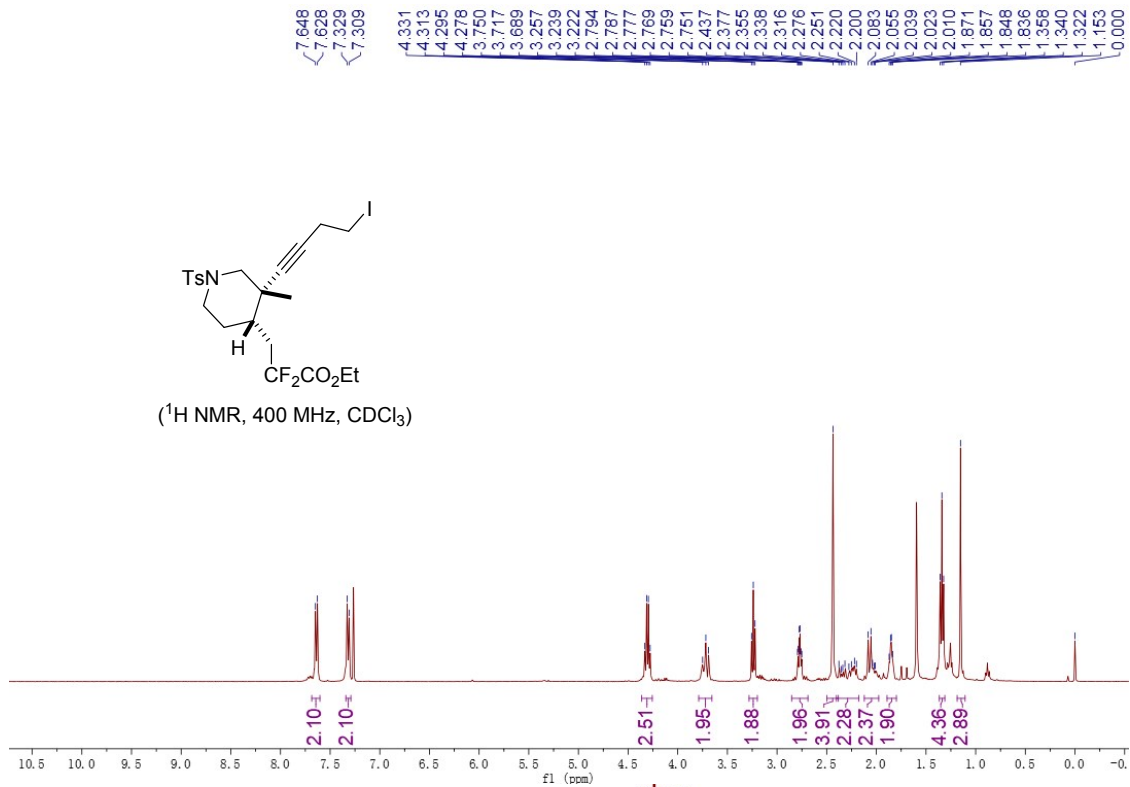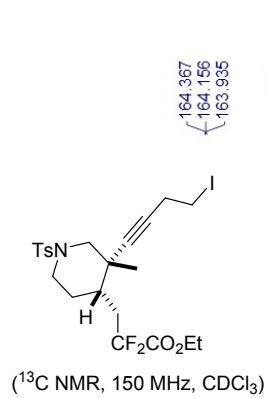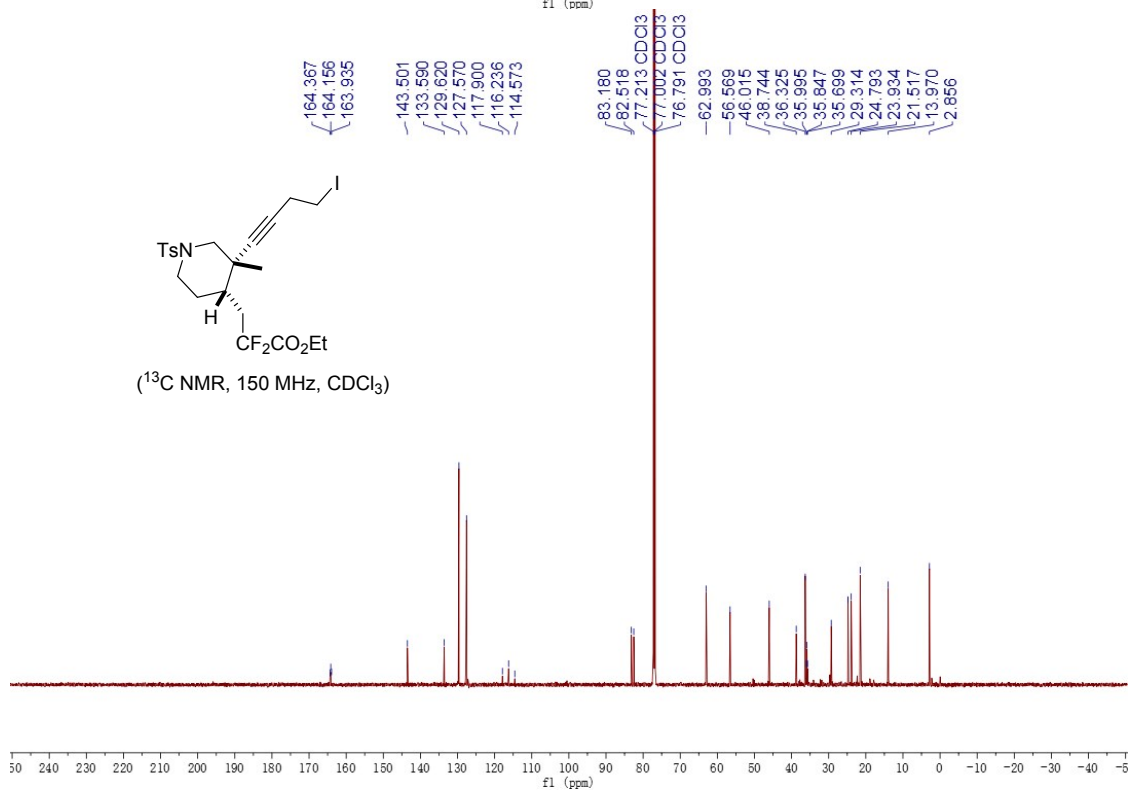

-103.130  
-103.152  
-103.174  
-103.193

-103.589  
-103.611  
-103.630  
-103.652

-105.134  
-105.164  
-105.174  
-105.203

-105.594  
-105.621  
-105.634  
-105.661

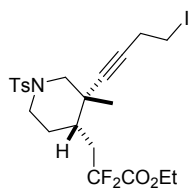

(<sup>19</sup>F NMR, 564 MHz, CDCl<sub>3</sub>)

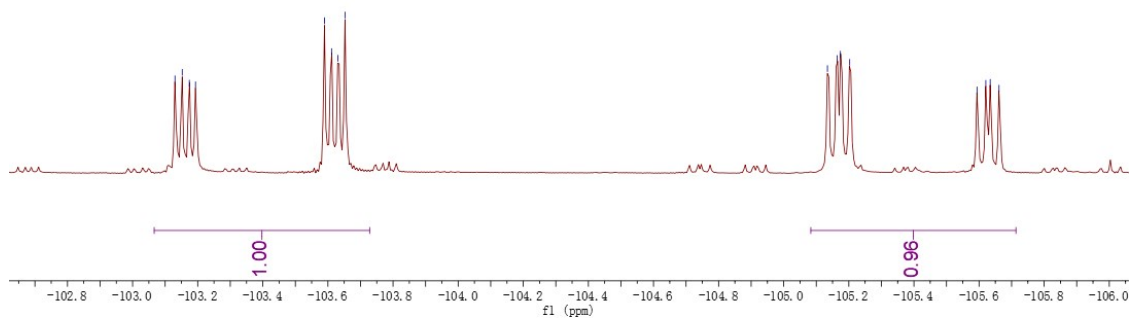

7.744  
7.739  
7.722  
7.692  
7.676  
7.671  
7.671  
4.358  
4.340  
4.322  
4.305  
3.796  
3.775  
3.755  
3.591  
3.566  
3.178  
3.153  
3.120  
3.095  
3.081  
3.069  
3.057  
3.041  
3.033  
3.016  
3.000  
2.976  
2.549  
2.532  
2.489  
2.473  
2.457  
2.439  
2.395  
2.318  
2.311  
2.276  
2.259  
2.250  
2.220  
2.193  
2.167  
2.130  
2.068  
2.042  
2.017  
1.991  
1.374  
1.356  
1.338  
1.232  
0.000

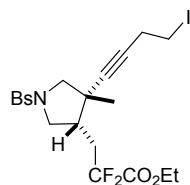

(<sup>1</sup>H NMR, 400 MHz, CDCl<sub>3</sub>)

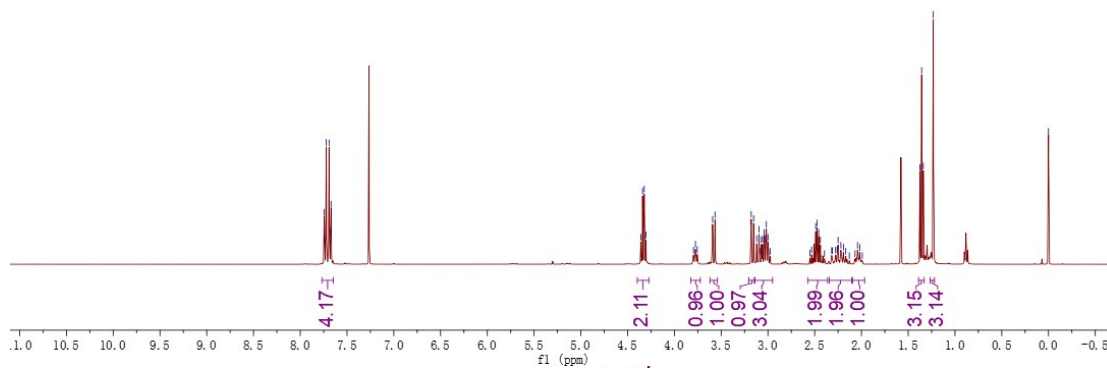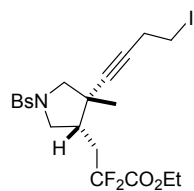

(<sup>13</sup>C NMR, 150 MHz, CDCl<sub>3</sub>)

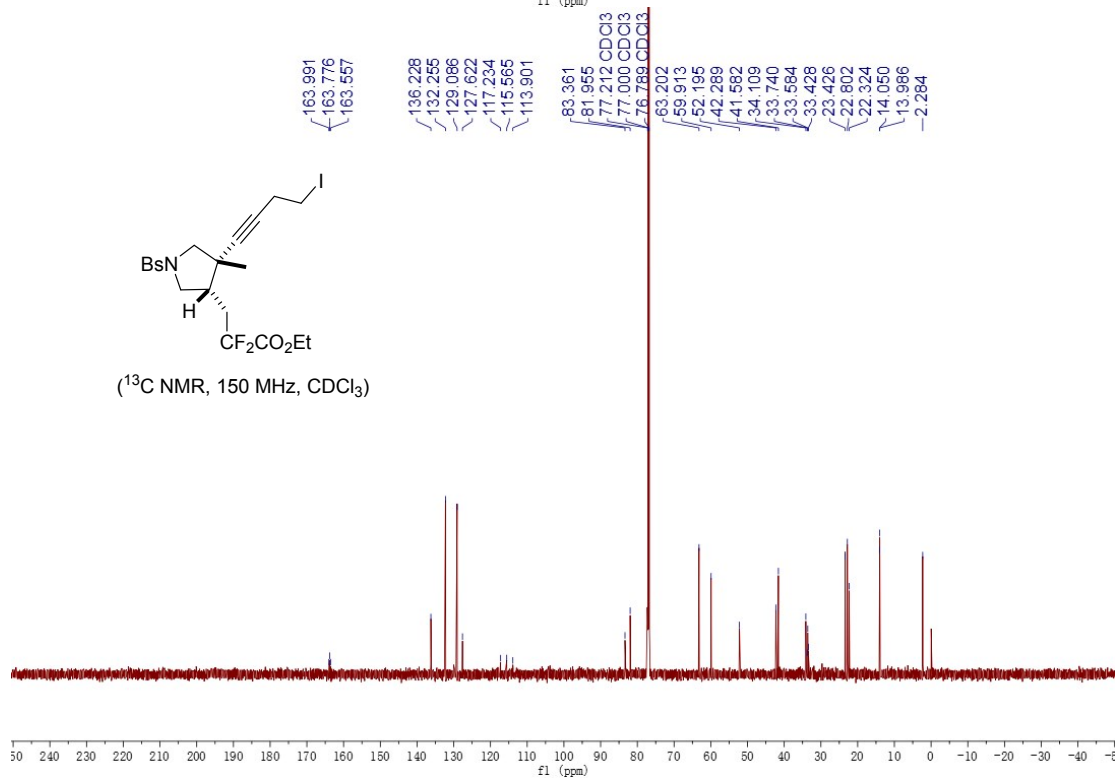

-103.203  
-103.220  
-103.247  
-103.265

-103.666  
-103.684  
-103.711  
-103.729

-105.855  
-105.882  
-105.896  
-105.922

-106.318  
-106.346  
-106.359  
-106.386

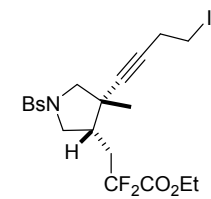

(<sup>19</sup>F NMR, 564 MHz, CDCl<sub>3</sub>)

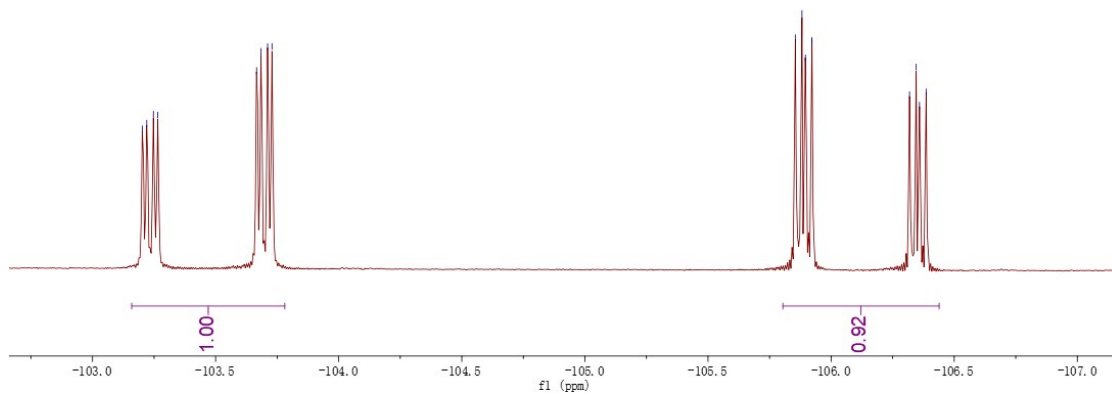



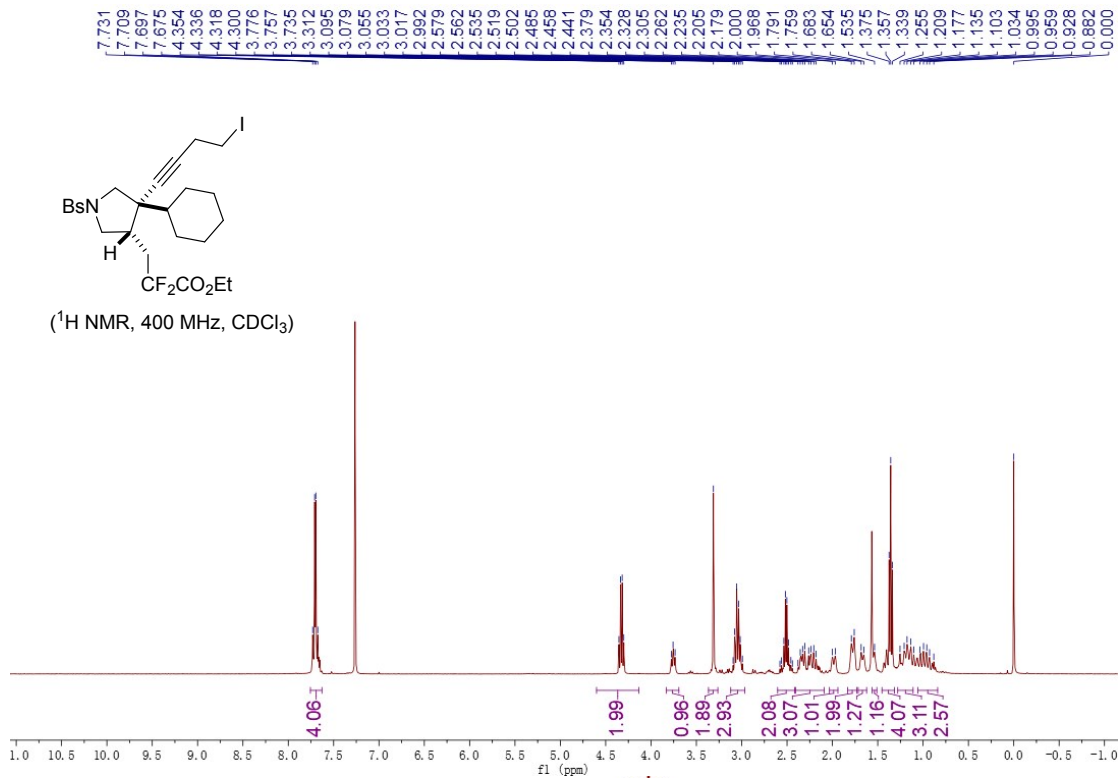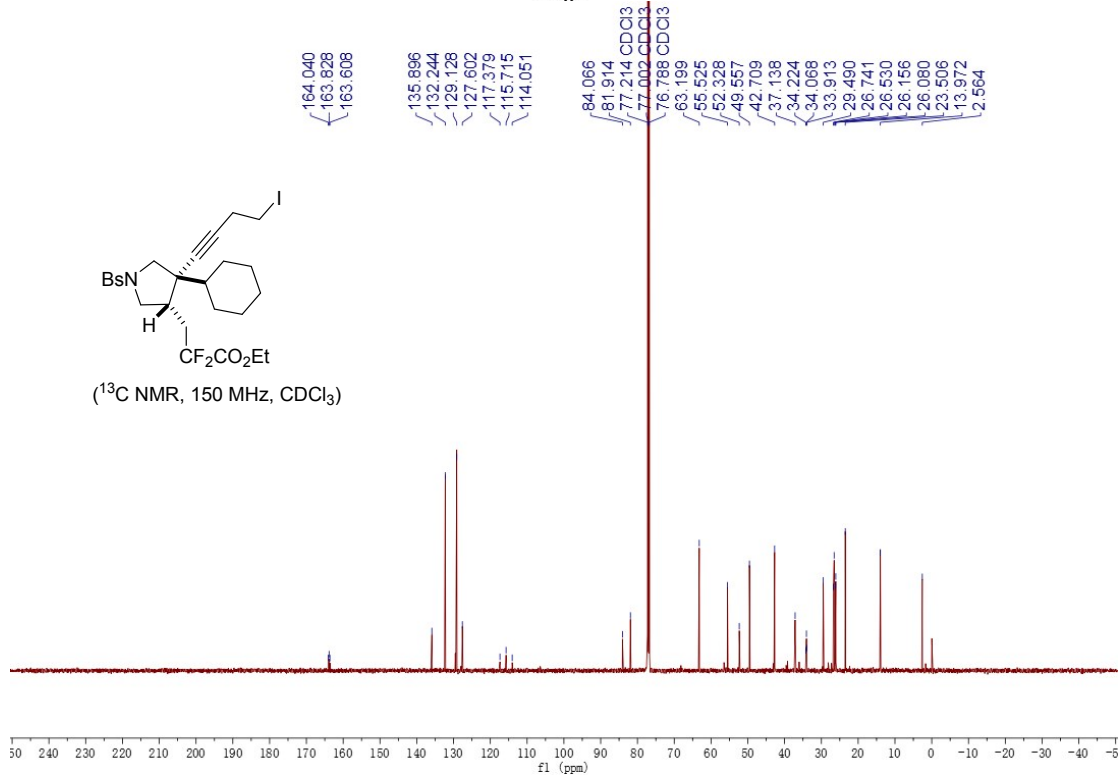

-102.572  
-102.590  
-102.616  
-102.631  
-103.036  
-103.053  
-103.080  
-103.095

-105.823  
-105.860  
-105.863  
-105.891  
-105.903  
-105.936  
-106.286  
-106.314  
-106.328  
-106.354  
-106.384

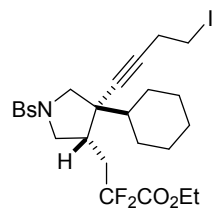

(<sup>19</sup>F NMR, 564 MHz, CDCl<sub>3</sub>)

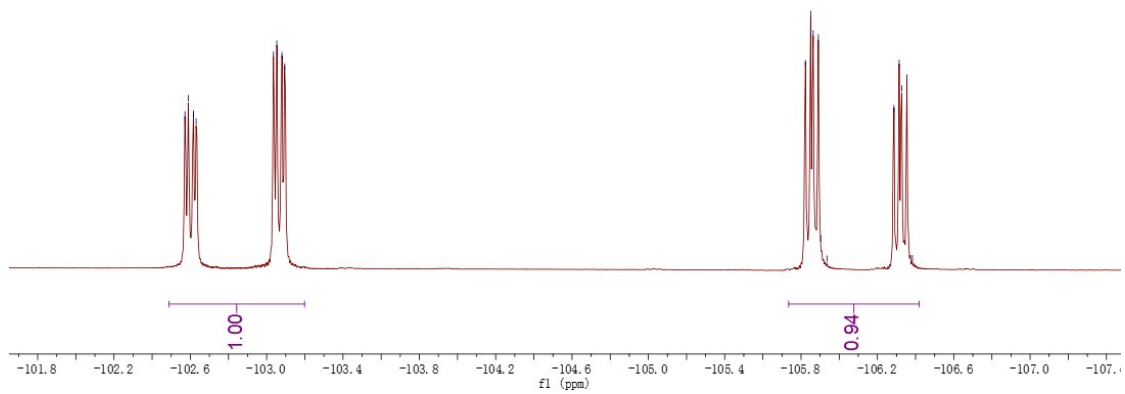

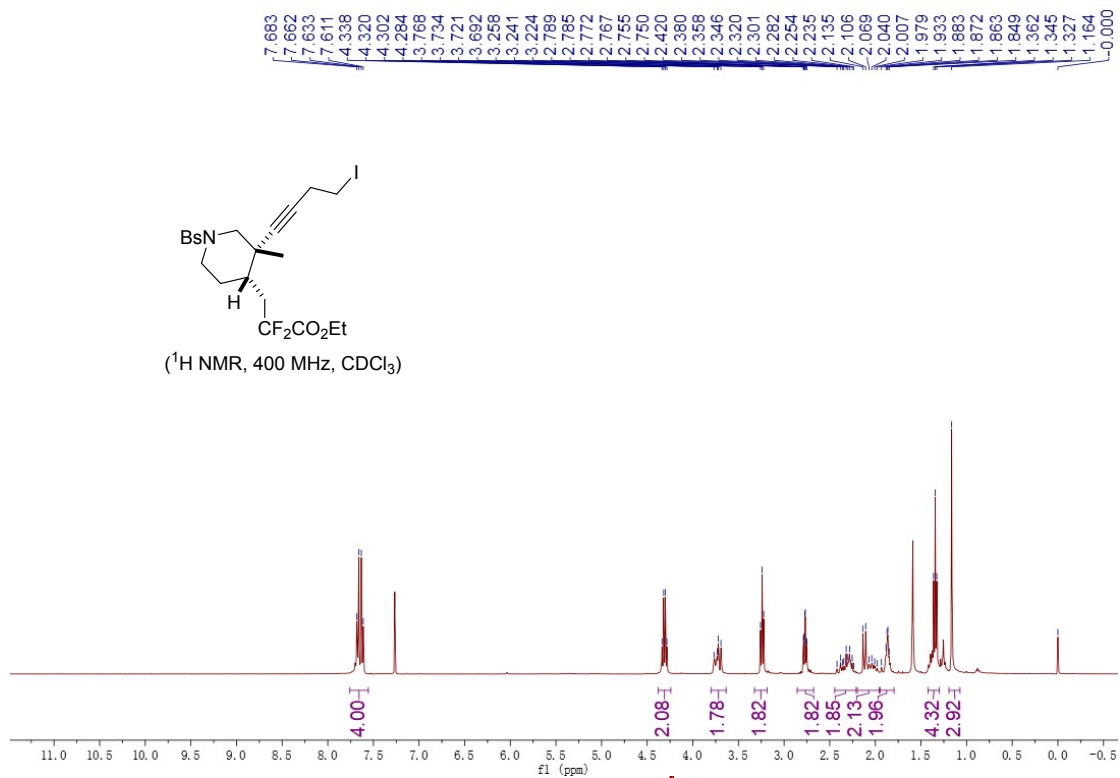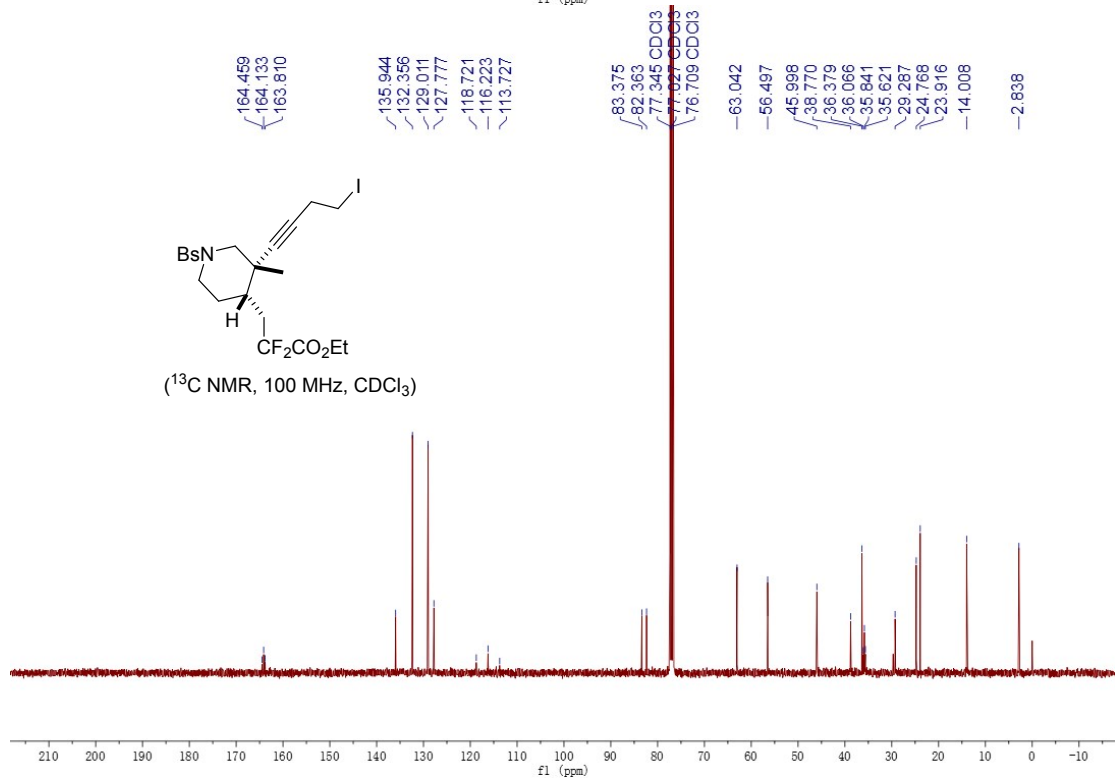

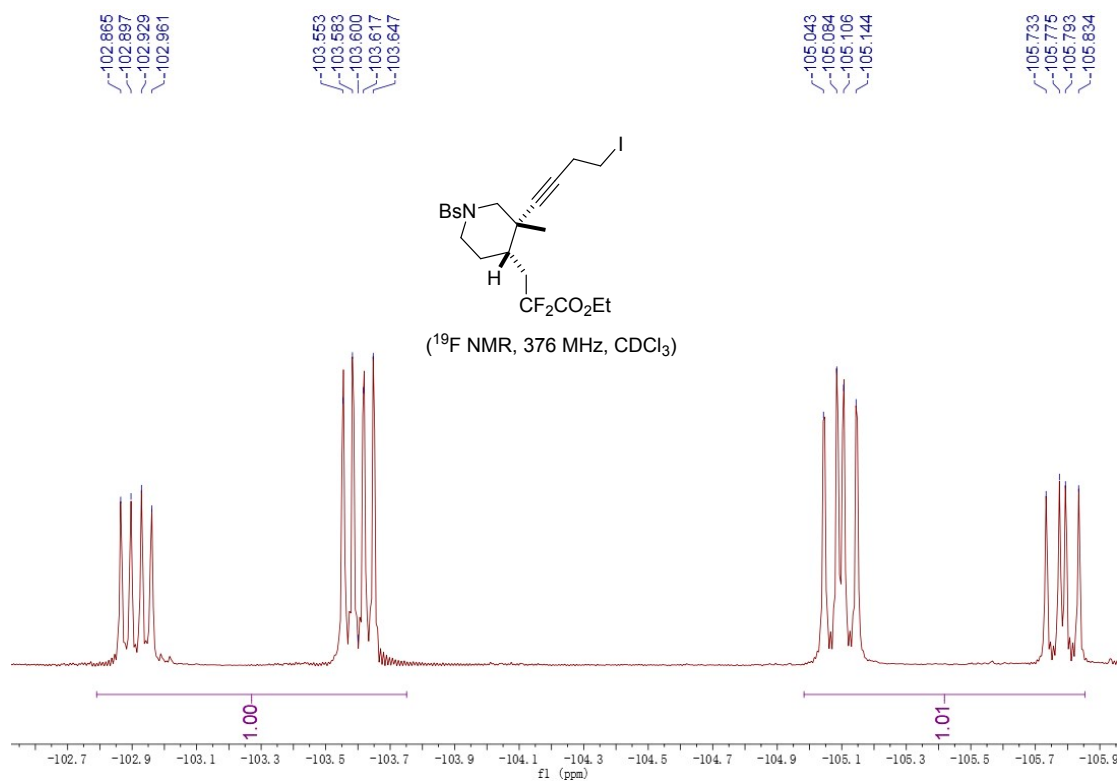

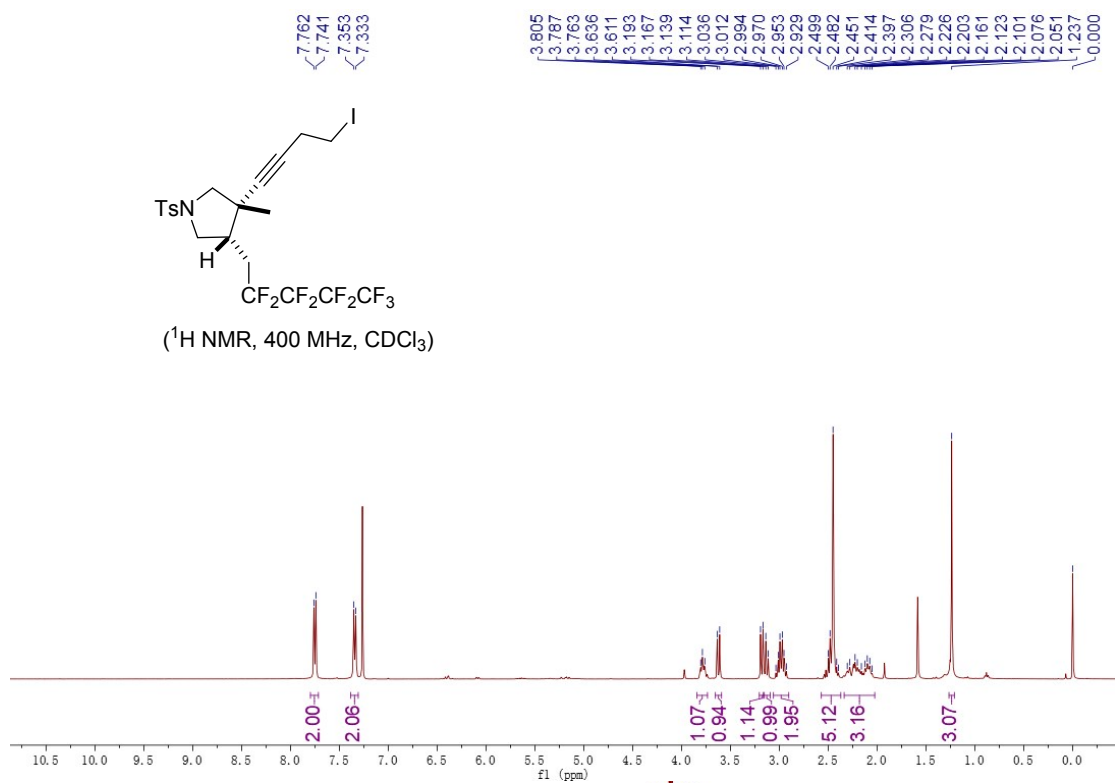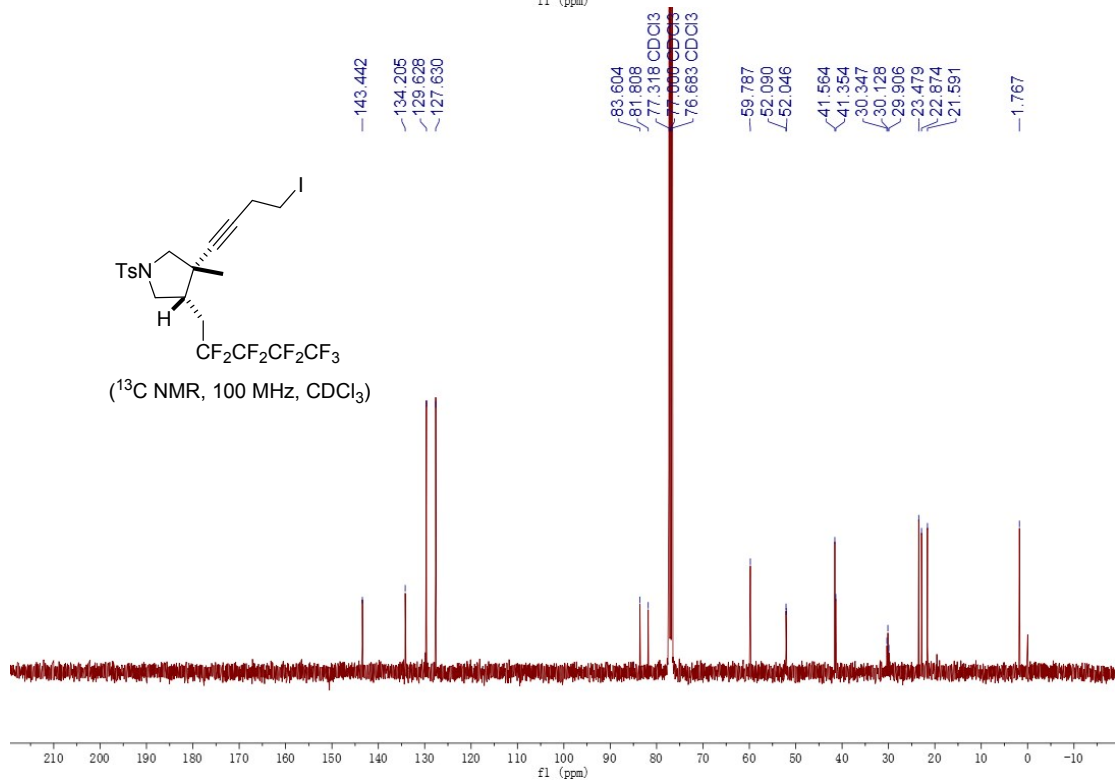

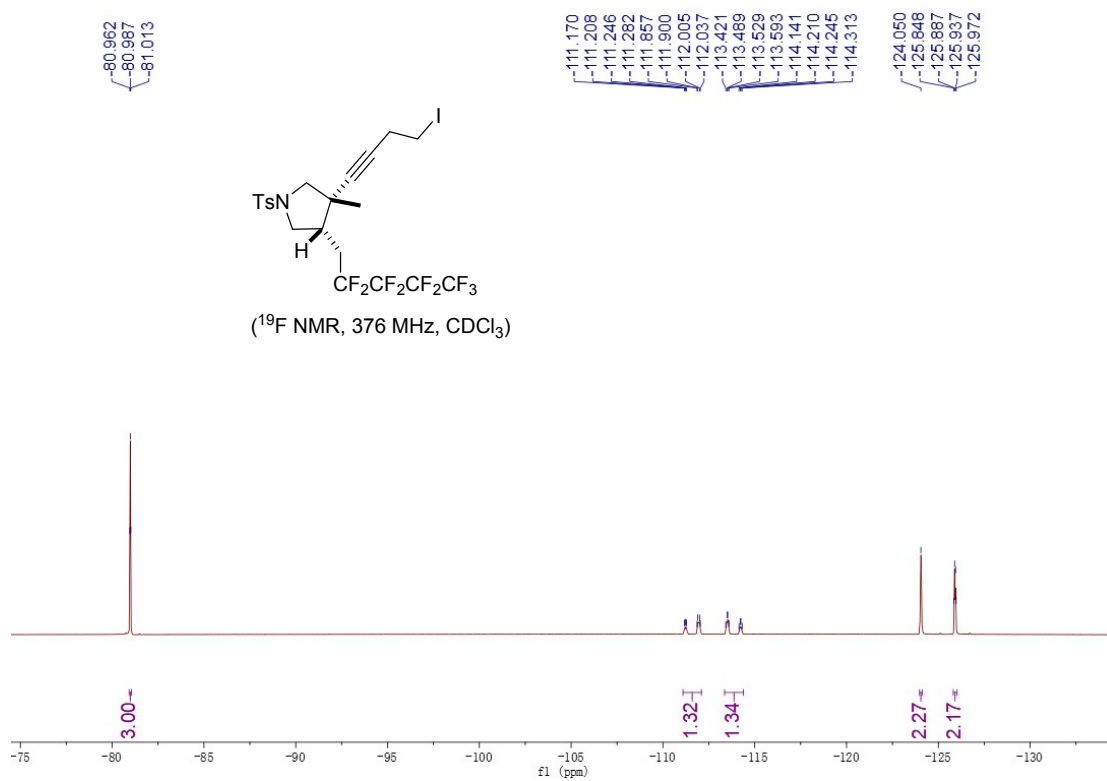

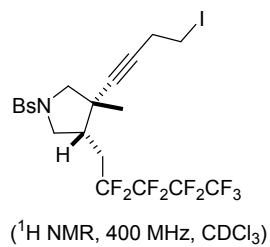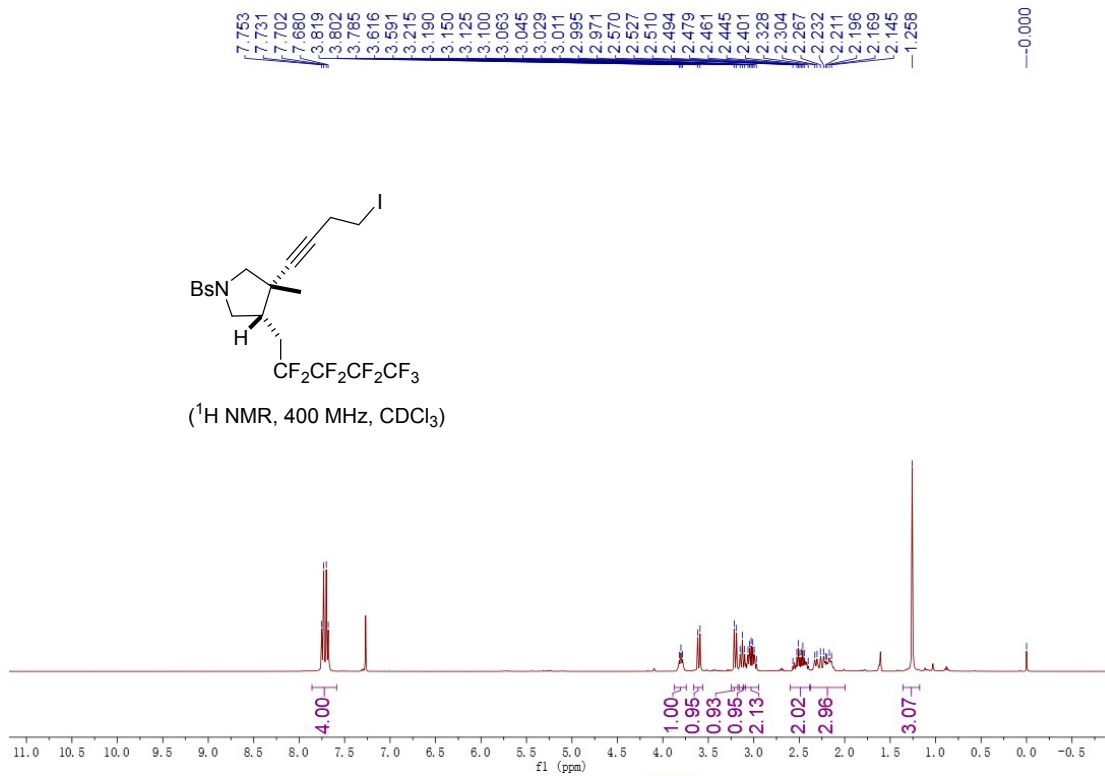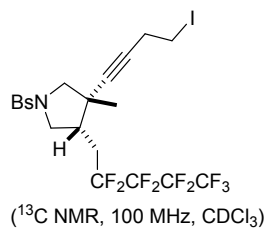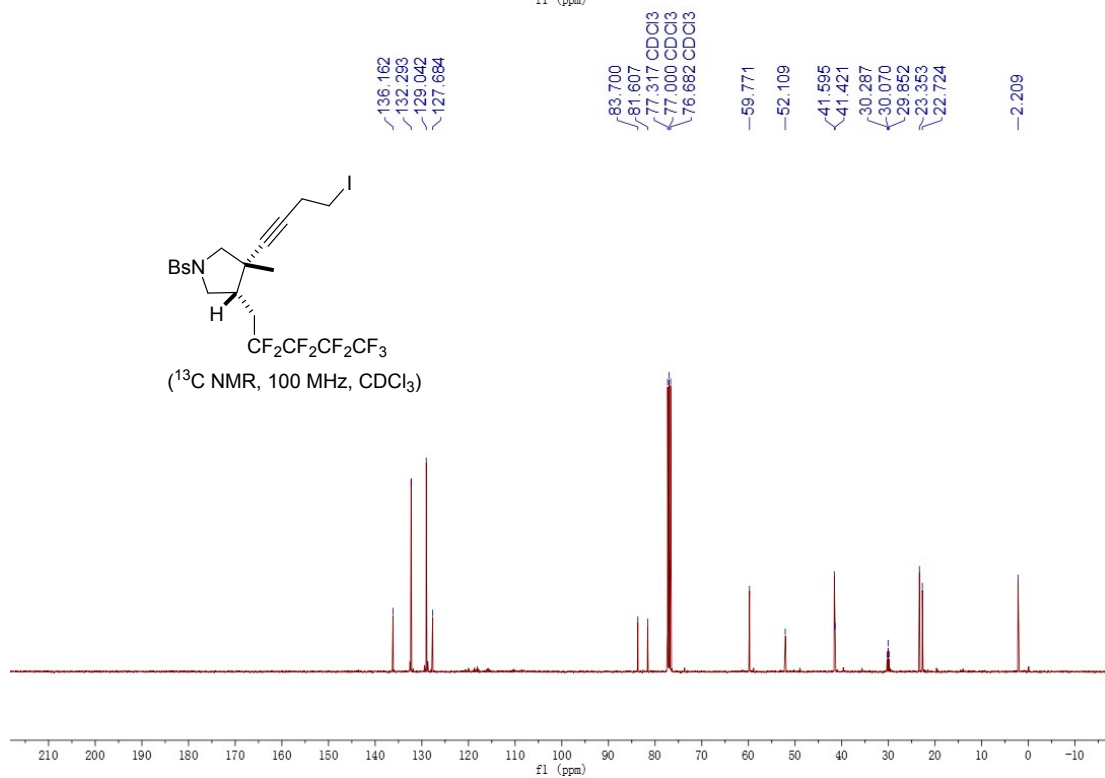

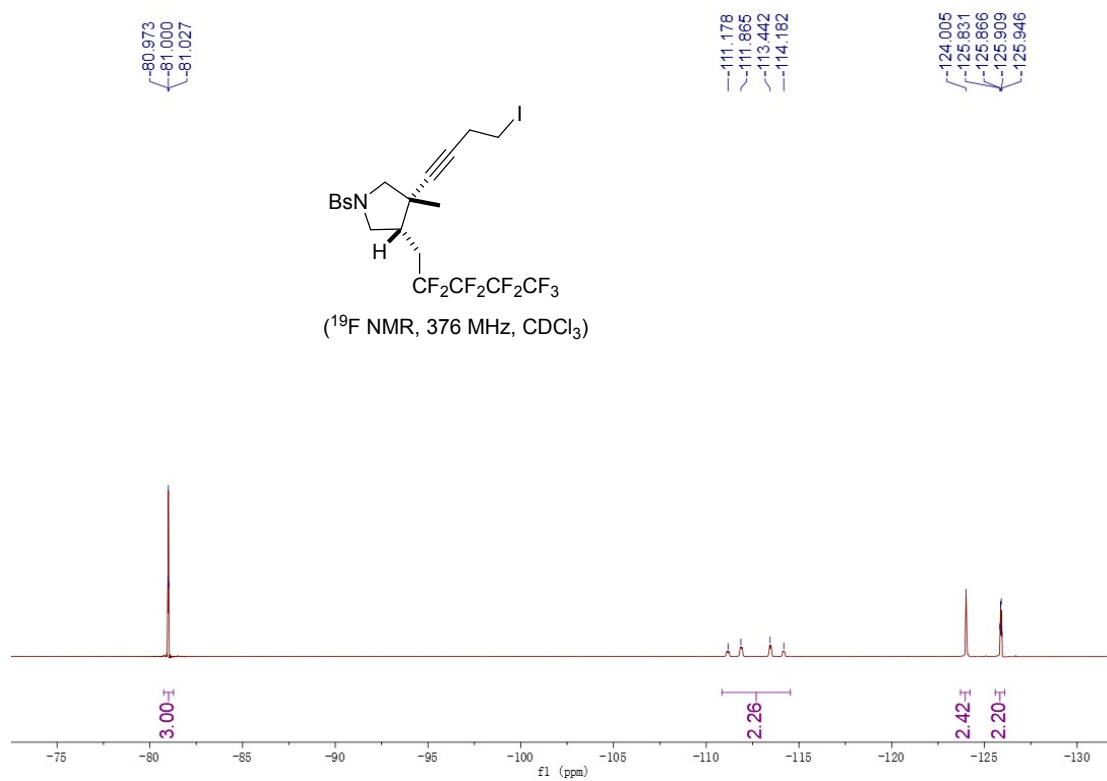



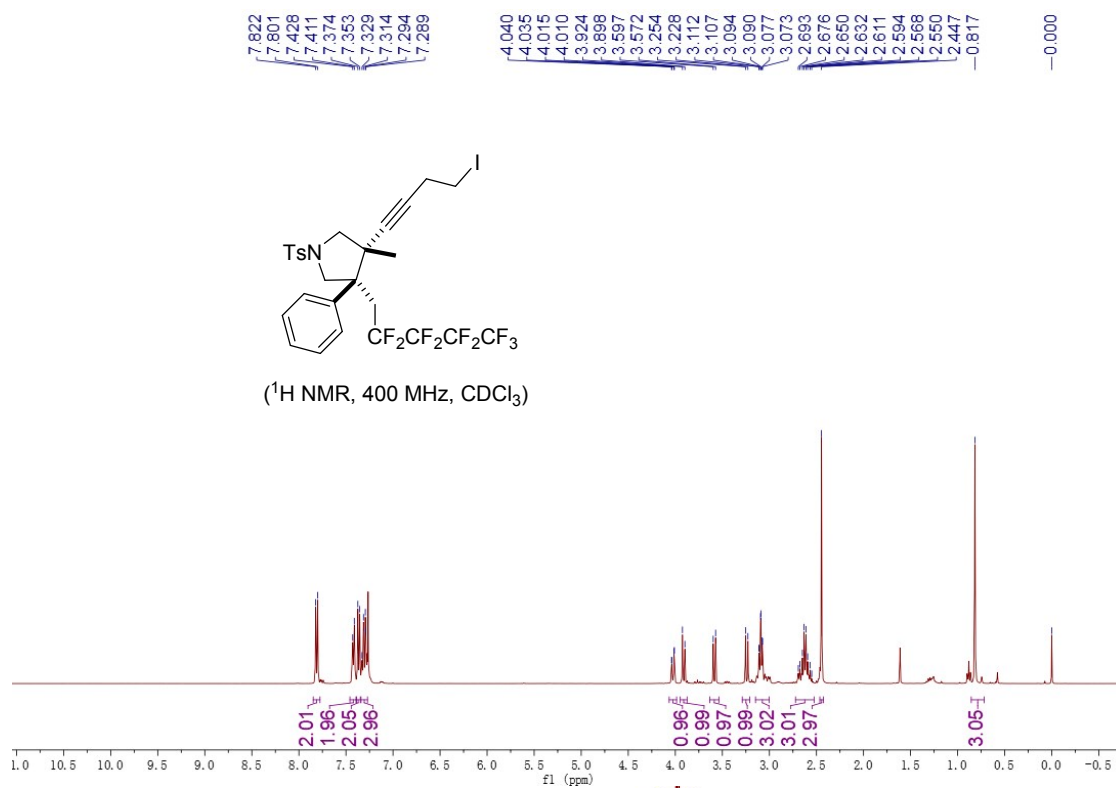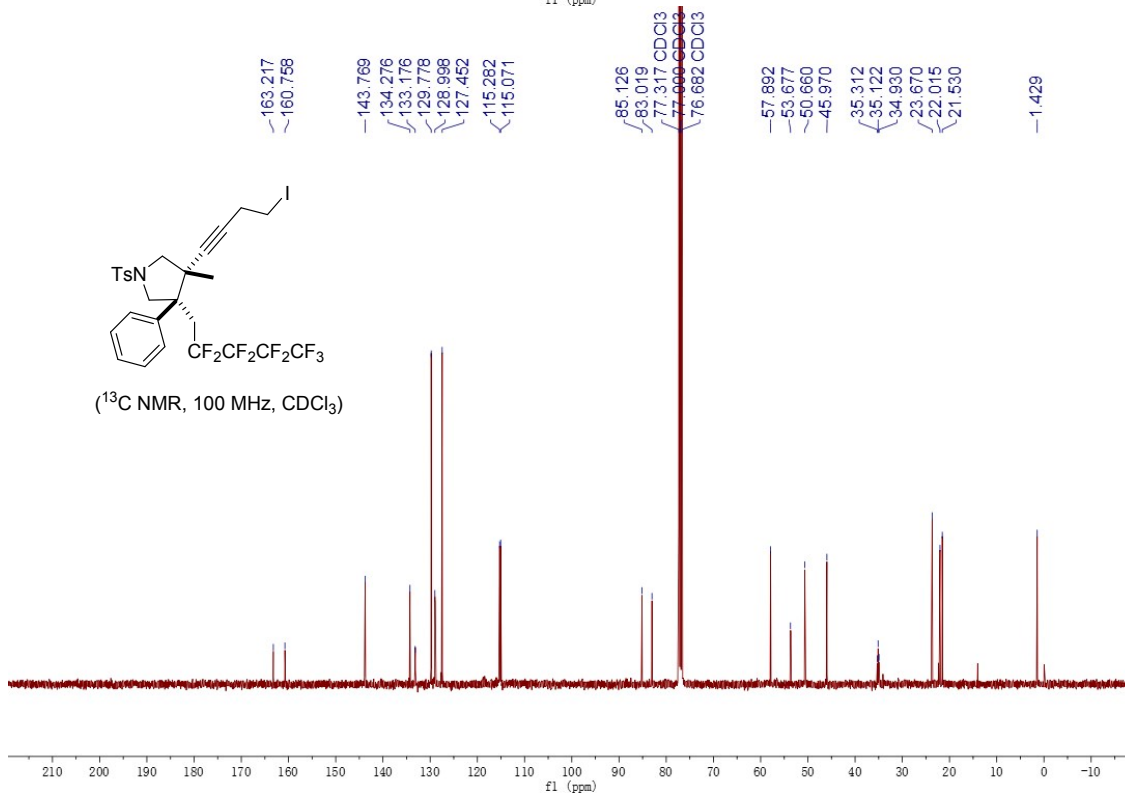

-81.047  
-81.074  
-81.101

-109.094  
-109.812  
-110.749  
-111.468

-124.118  
-125.836

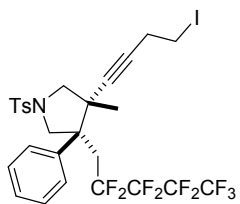

(<sup>19</sup>F NMR, 376 MHz, CDCl<sub>3</sub>)

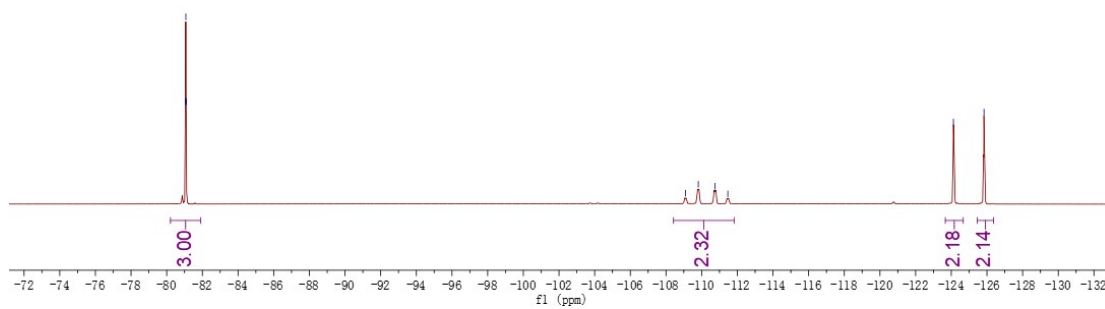

7.815  
7.795  
7.367  
7.348  
7.295  
7.275  
7.117  
7.097  
4.022  
4.017  
3.997  
3.992  
3.885  
3.859  
3.574  
3.549  
3.233  
3.208  
3.098  
3.060  
3.060  
2.657  
2.630  
2.612  
2.593  
2.574  
2.549  
2.447  
2.320  
-0.815  
-0.000

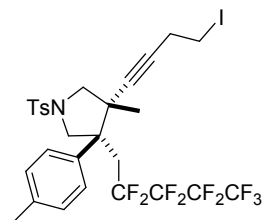

( $^1\text{H}$  NMR, 400 MHz,  $\text{CDCl}_3$ )

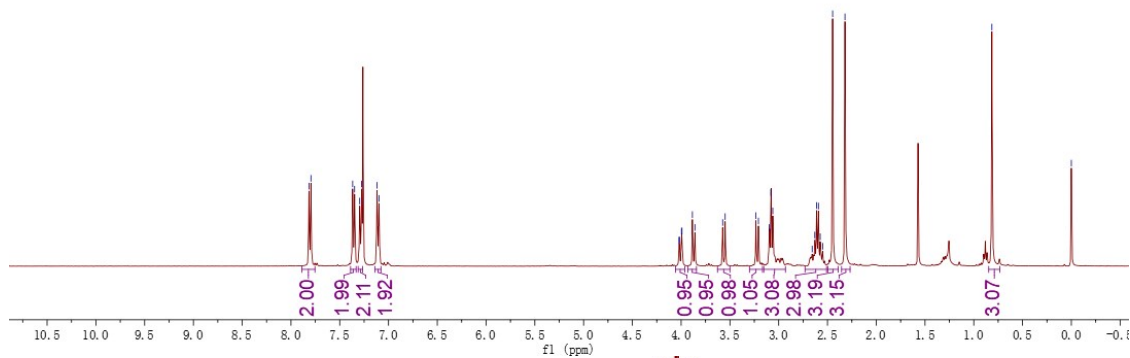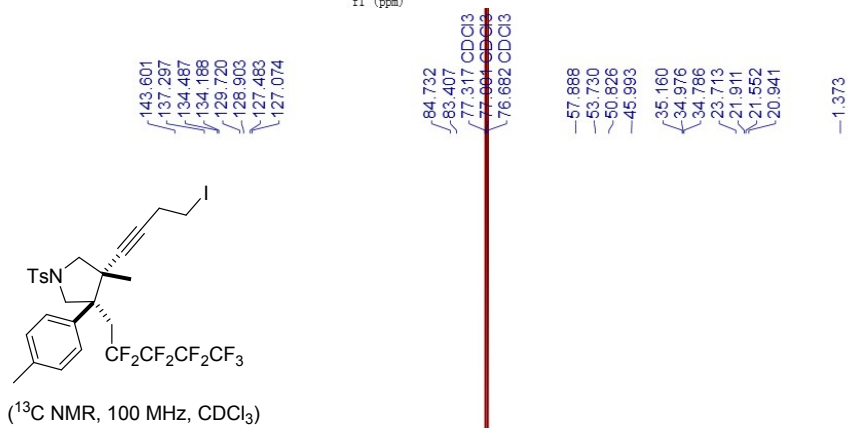

( $^{13}\text{C}$  NMR, 100 MHz,  $\text{CDCl}_3$ )

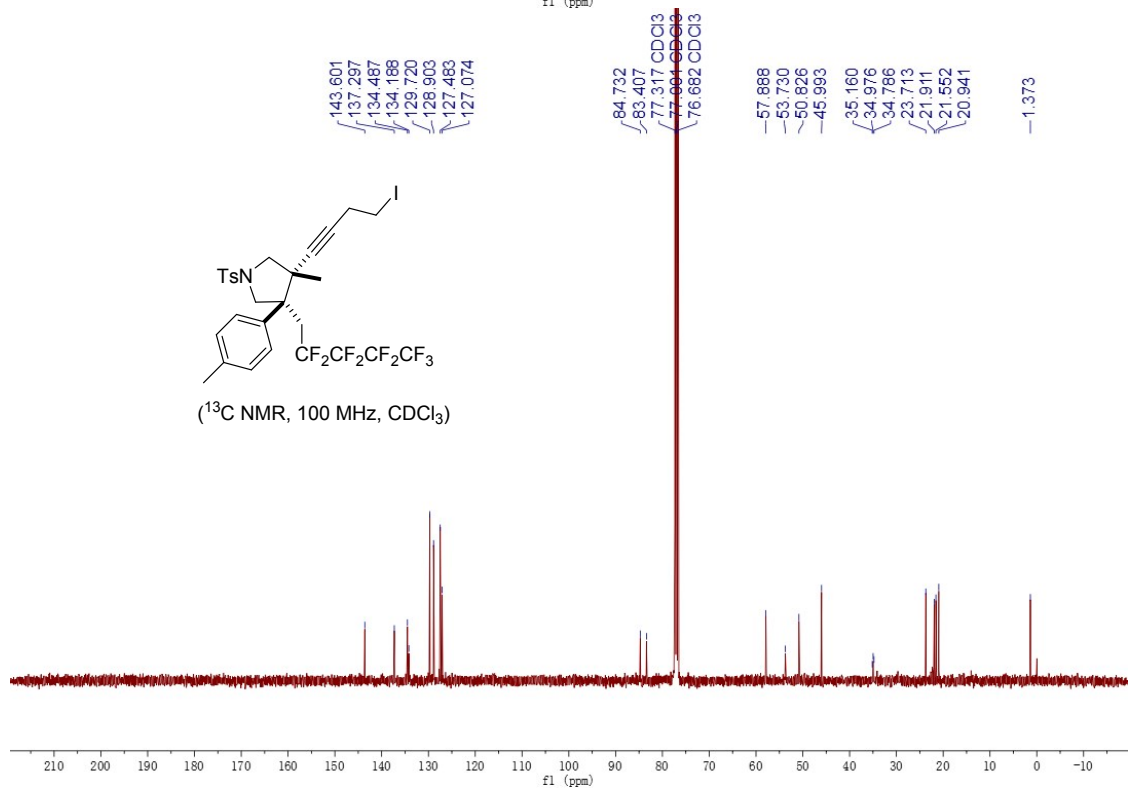

-81.038  
-81.064  
-81.089

-109.072  
-109.791  
-110.745  
-111.463

-124.125  
-125.792

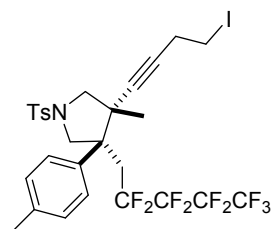

(<sup>19</sup>F NMR, 376 MHz, CDCl<sub>3</sub>)

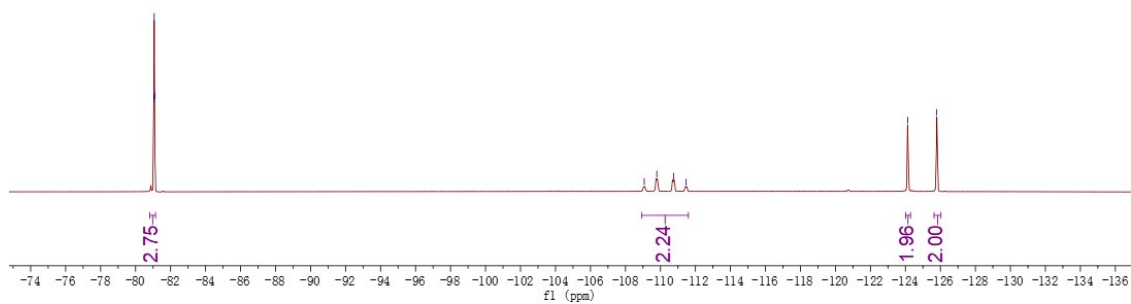

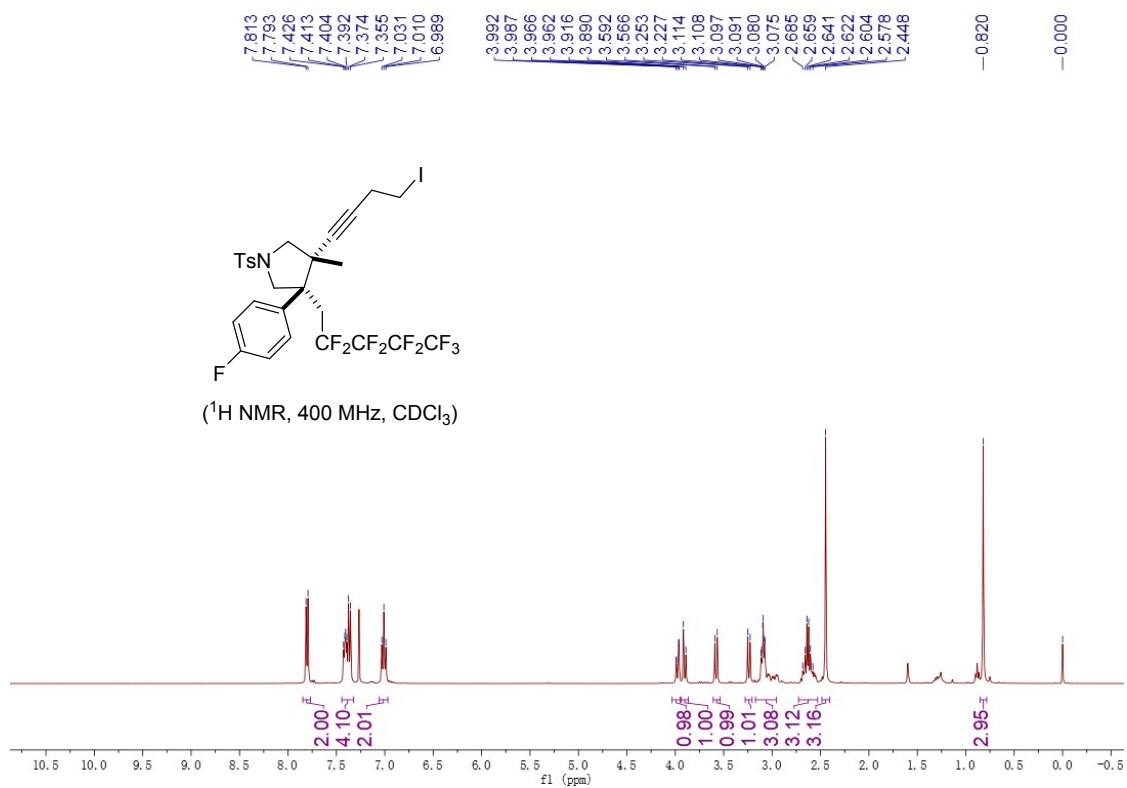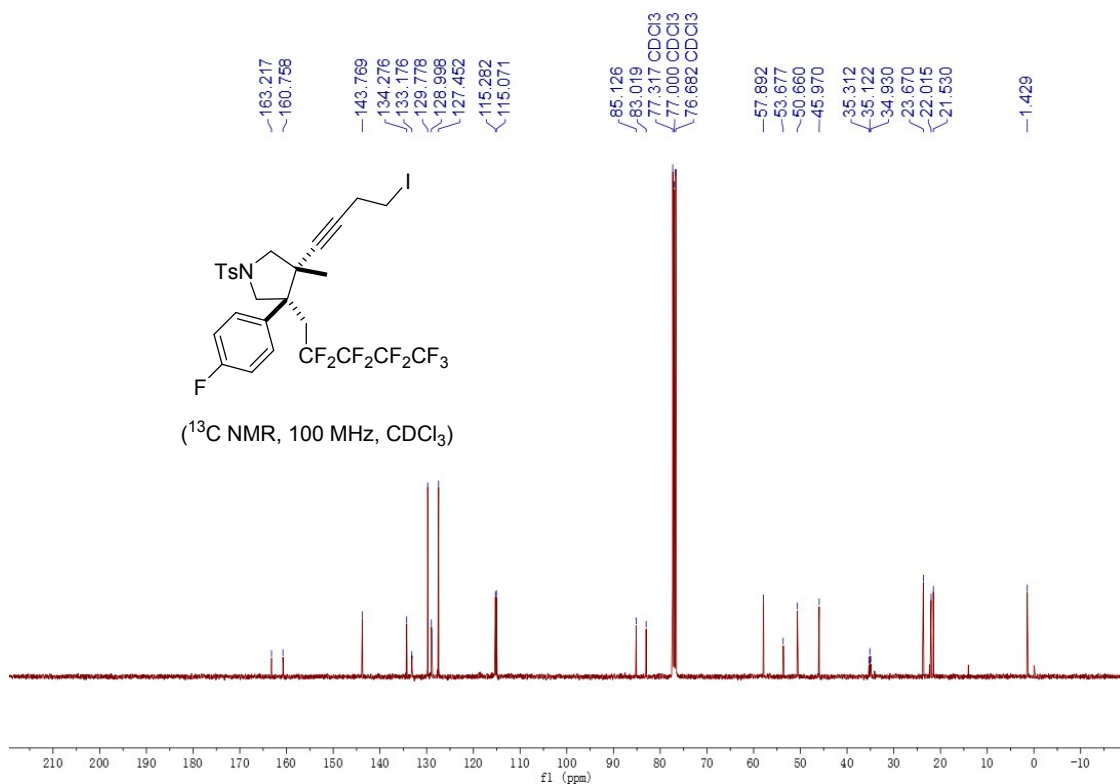

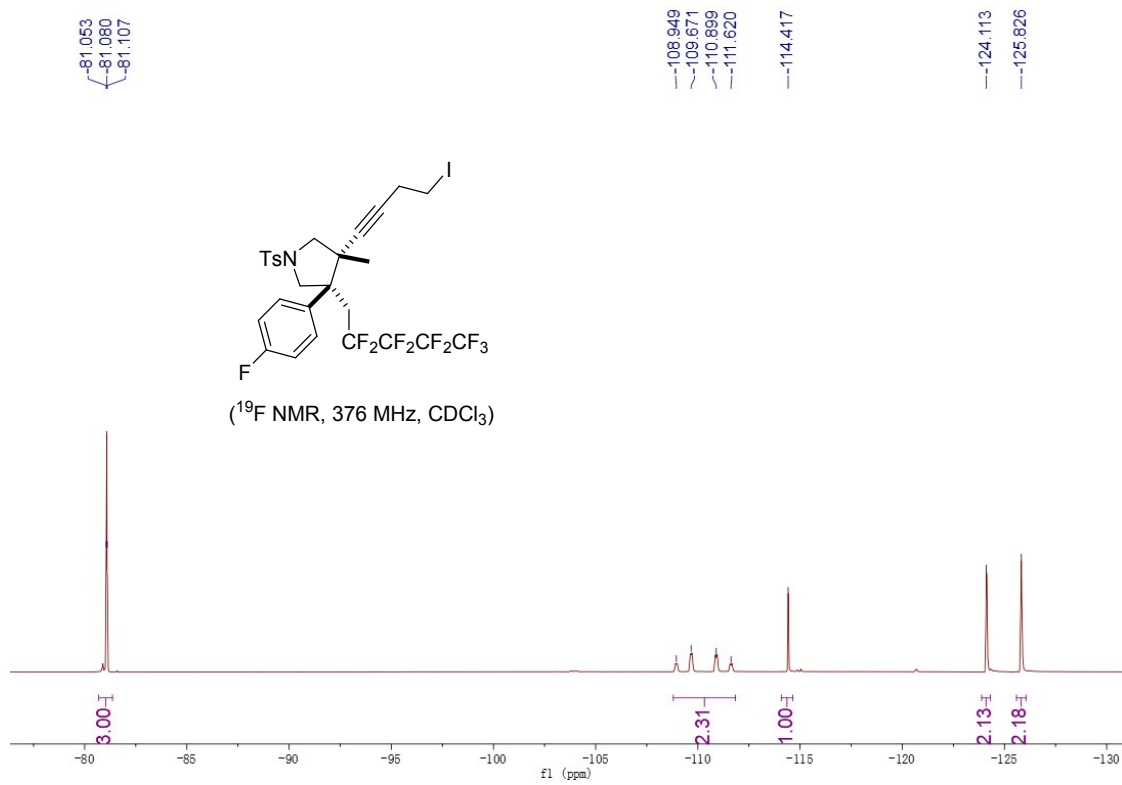

7.832  
7.811  
7.443  
7.426  
7.394  
7.374  
7.347  
7.327  
7.307  
4.175  
4.167  
4.150  
4.142  
3.724  
3.719  
3.699  
3.693  
3.551  
3.525  
3.287  
3.253  
3.164  
3.081  
3.055  
3.025  
3.003  
2.980  
2.962  
2.945  
2.929  
2.913  
2.486  
2.417  
2.400  
2.382  
2.363  
1.854  
1.822  
1.734  
1.709  
1.617  
1.578  
1.546  
1.435  
1.406  
1.375  
1.278  
1.255  
1.220  
1.190  
1.167  
1.101  
1.077  
1.052  
1.023  
1.002  
0.974  
0.959  
0.000

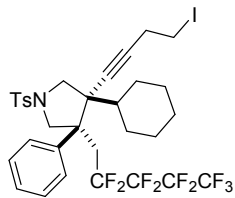

(<sup>1</sup>H NMR, 400 MHz, CDCl<sub>3</sub>)

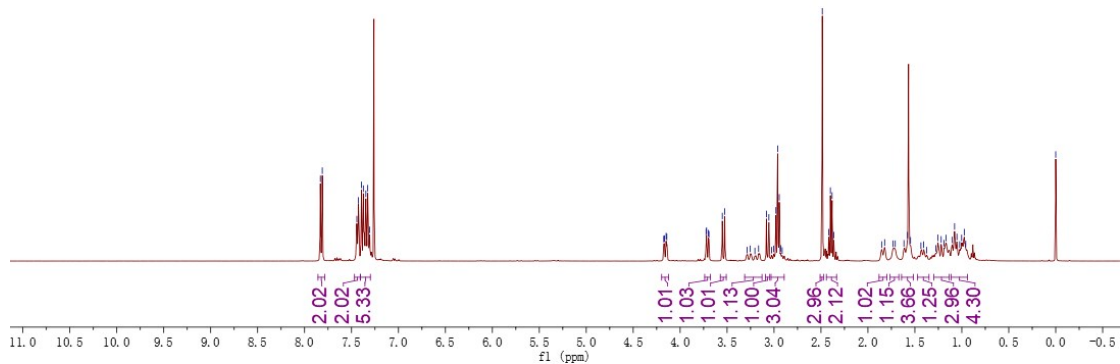

143.312  
137.540  
134.940  
129.623  
128.467  
127.739  
127.708  
127.090

86.145  
81.281  
77.319  
77.000  
76.684

56.454  
55.933  
55.329  
52.603  
40.576  
36.361  
36.167  
35.976  
29.574  
26.058  
25.623  
23.641  
21.661

-1.202

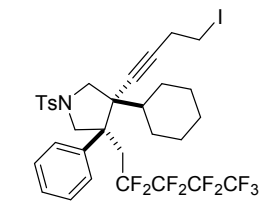

(<sup>13</sup>C NMR, 100 MHz, CDCl<sub>3</sub>)

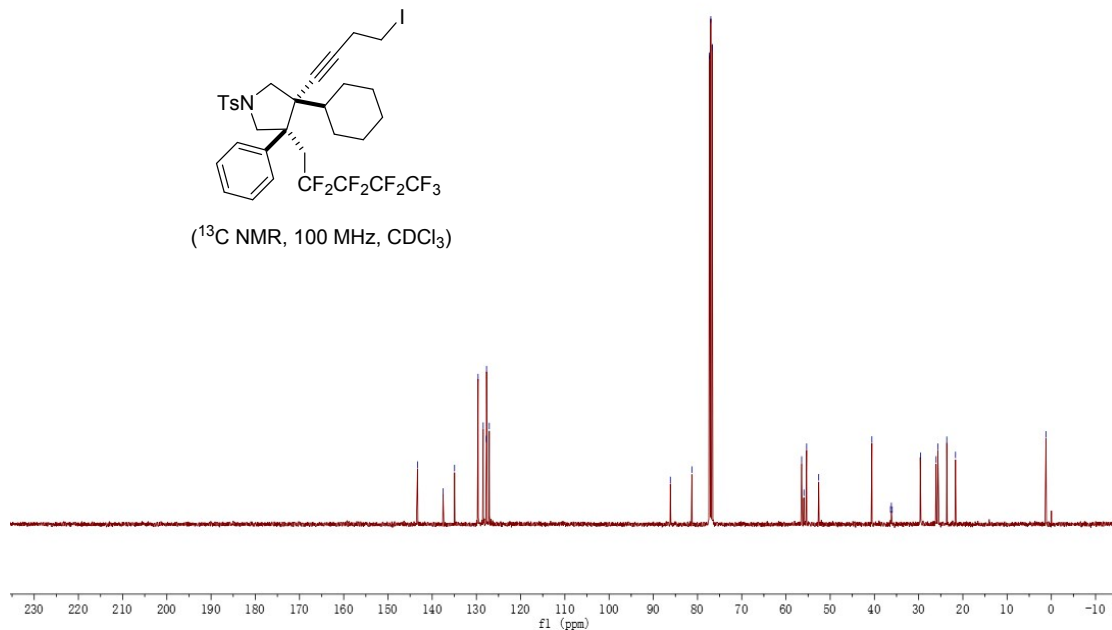

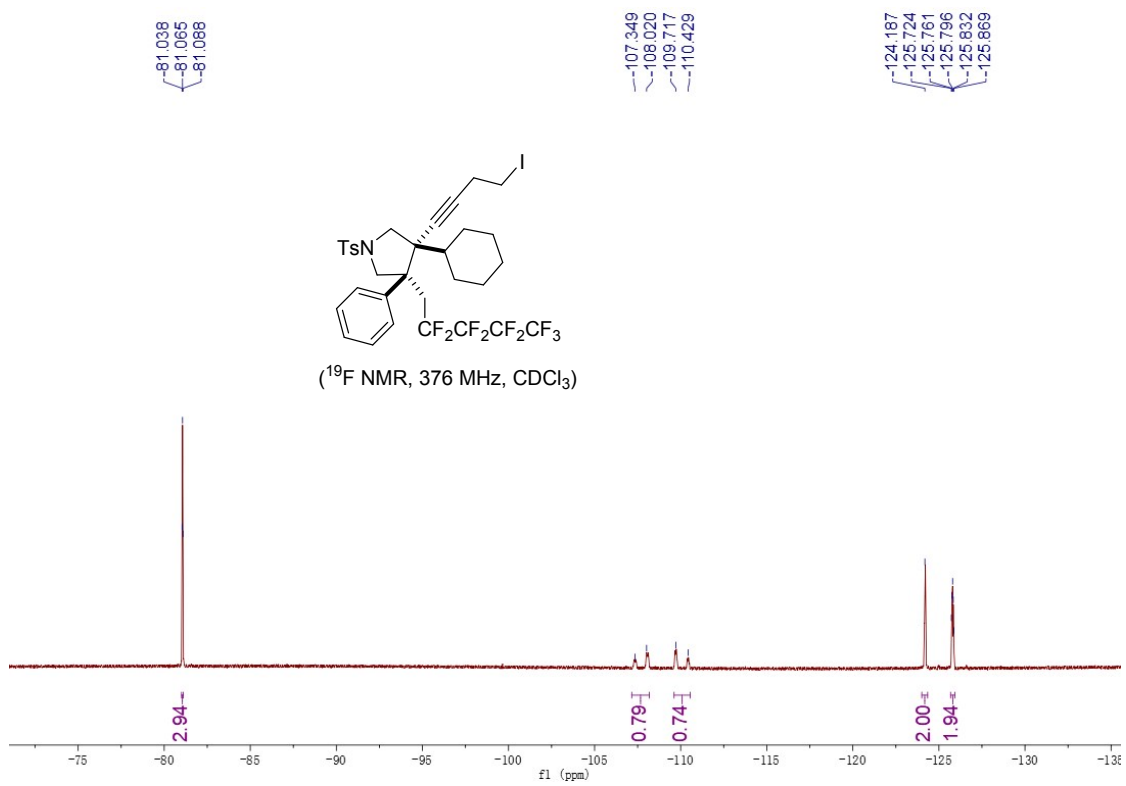



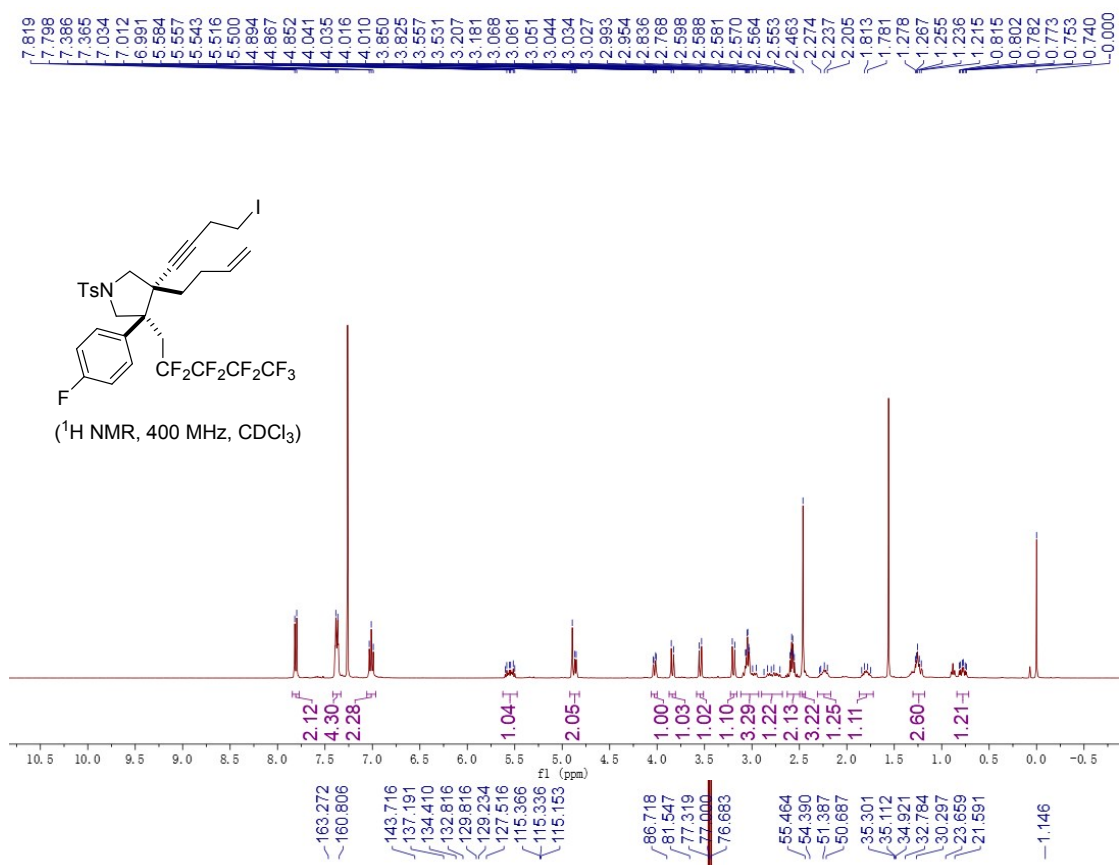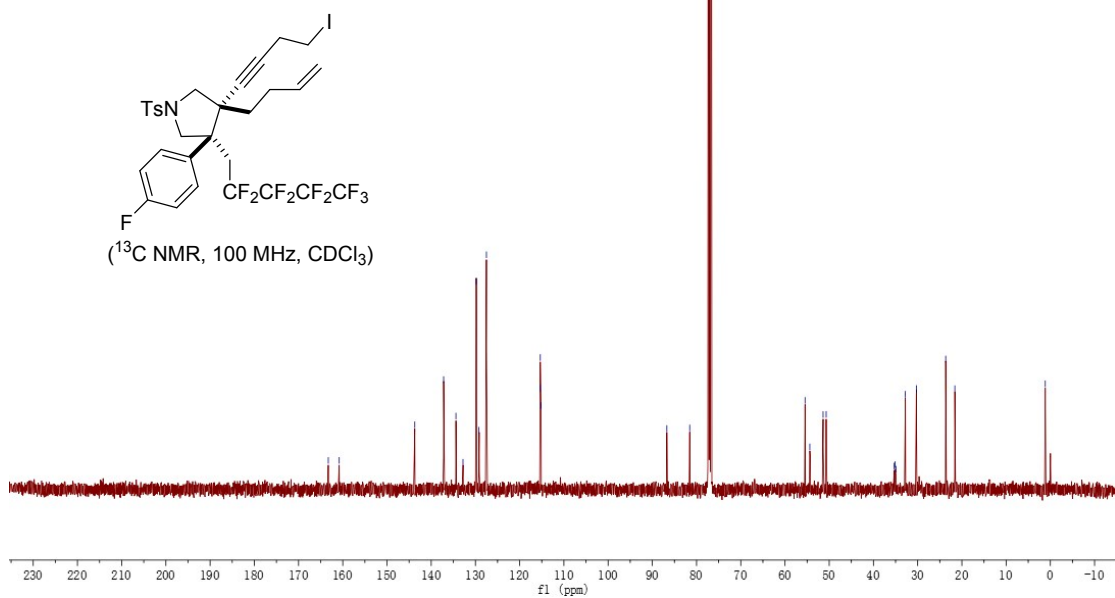

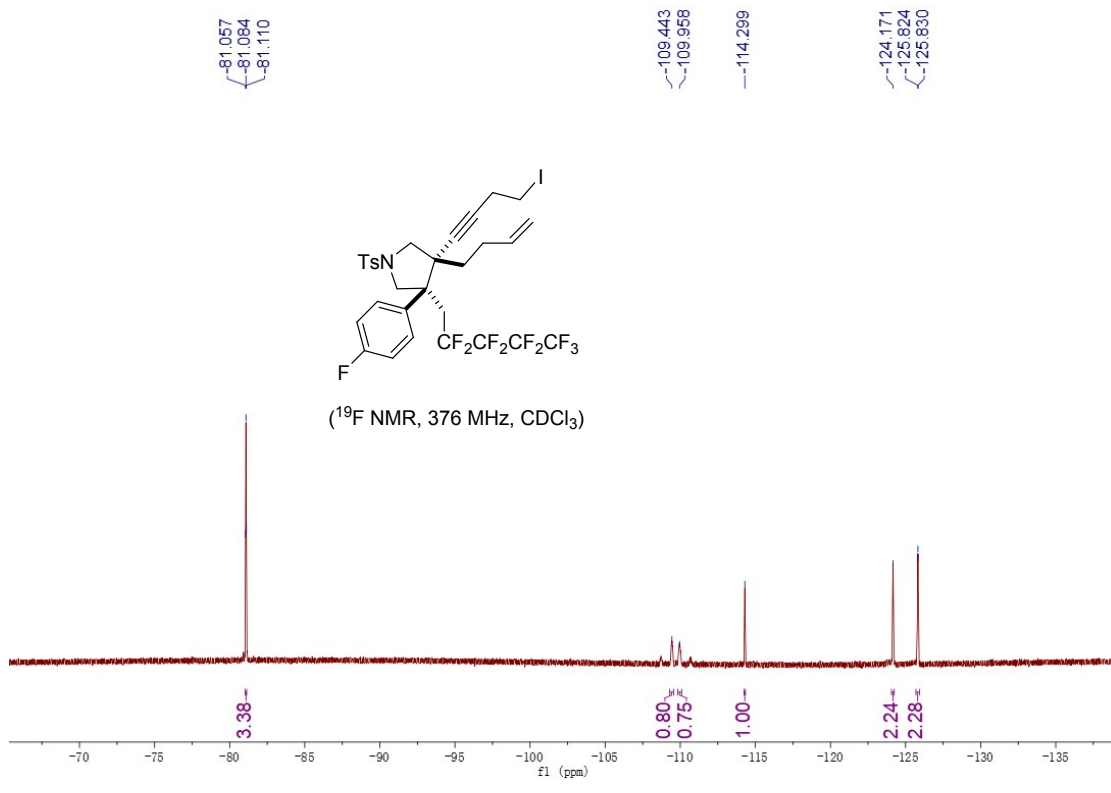

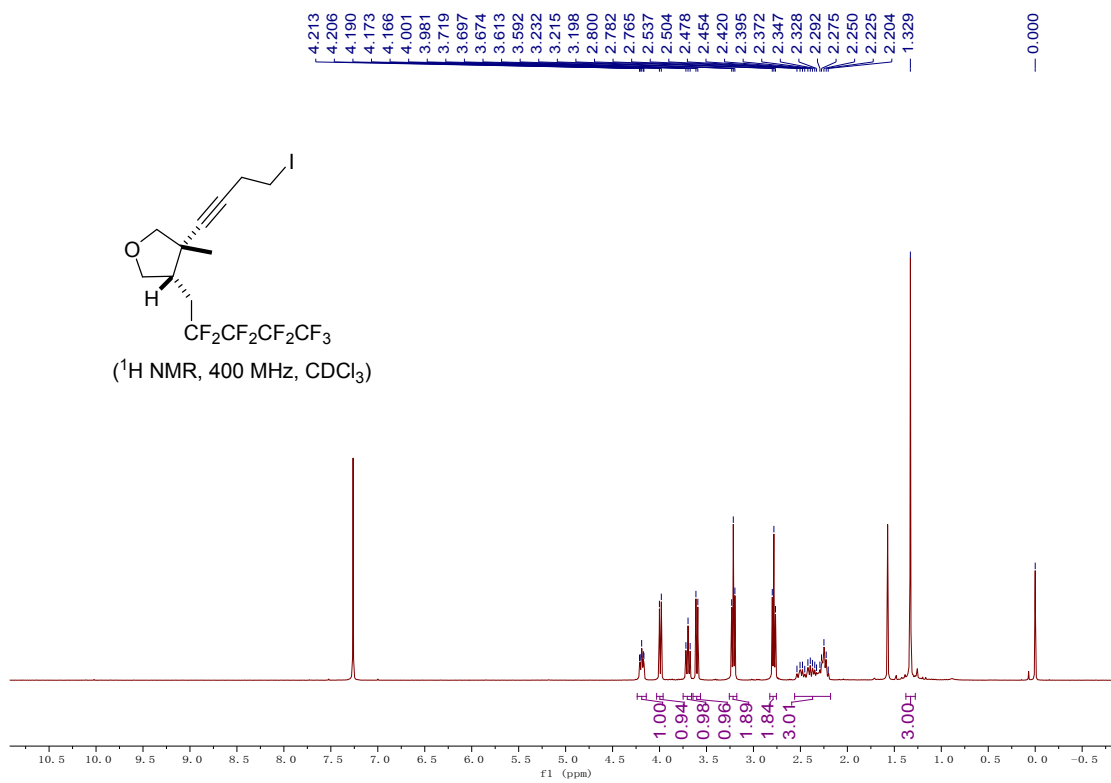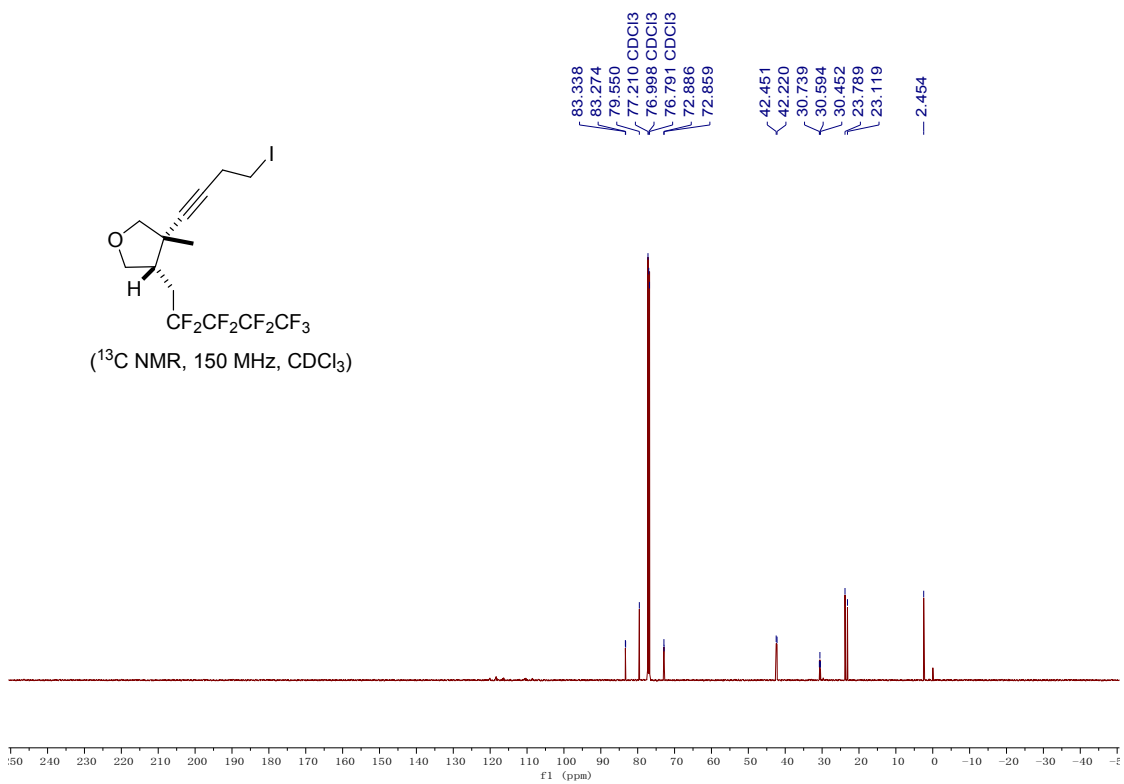

Supplement: d1qo00540e1.pdf [file d1qo00540e1.pdf]
